# Supplementary material for: Selective cobalt nanoparticles for catalytic transfer hydrogenation of N-heteroarenes
Source: PubMed Central journal article supplement (PMC5628387; doi:10.1039/c7sc02062g), 2017-07-12
Supplement: SC-008-C7SC02062G-s001.pdf [file SC-008-C7SC02062G-s001.pdf]

# Selective Cobalt Nanoparticles for Catalytic Transfer Hydrogenation of N-Heteroarenes

Feng Chen,<sup>a</sup> Basudev Sahoo,<sup>a</sup> Carsten Kreyenschulte,<sup>a</sup> Henrik Lund,<sup>a</sup> Min Zeng,<sup>b</sup> Lin He,<sup>b</sup> Kathrin Junge,<sup>a</sup> and Matthias Beller\*<sup>a</sup>

E-Mail: [Matthias.Beller@catalysis.de](mailto:Matthias.Beller@catalysis.de)

<sup>a</sup> Leibniz-Institut für Katalyse e.V. an der Universität Rostock, Albert-Einstein Straße 29a, Rostock, 18059, Germany.

<sup>b</sup> State Key Laboratory for Oxo Synthesis and Selective Oxidation, Suzhou Research Institute of LICP, Chinese Academy of Sciences, Lanzhou 730000, P. R. China.

## Table of Contents:

1. General Remarks
2. Procedure for the Preparation of Catalysts
3. General Procedure for the Hydrogenation of Quinolines
4. Procedure for Catalyst Recycling
5. STEM Measurements of Catalyst
6. XPS Measurements of Catalyst
7. Hydrogen Production under Different Catalytic Systems
8. Deuterated Experiments
9. Characterization Data for the Substrate and Products
10. <sup>1</sup>H NMR, <sup>13</sup>C NMR and <sup>19</sup>F NMR Spectra of Substrates and Products
11. References

## 1. General Remarks

Unless otherwise stated, reactions were performed in autoclaves. Solvents were used directly without further purification. NMR spectra were recorded on Bruker AV 300 and 400 spectrometers. All chemical shifts ( $\delta$ ) are reported in parts per million (ppm) and coupling constants ( $J$ ) in Hz. All chemical shifts are reported relative to tetramethylsilane ( $\delta = 0.0$  for  $^1\text{H}$  NMR in  $\text{CDCl}_3$ ) and  $d$ -solvent peaks ( $\delta = 77.00$  for  $^{13}\text{C}$  NMR, chloroform), respectively. Mass spectra were recorded on an AMD 402/3 or a HP 5973 mass selective detector.

XRD powder pattern were recorded either on a Panalytical X'Pert diffractometer equipped with a Xcelerator detector or on a Panalytical Empyrean diffractometer equipped with a PIXcel 3D detector system, both used with automatic divergence slits and Cu  $K\alpha$  radiation (40 kV, 40 mA). Cu  $\beta$ -radiation was excluded by using nickel filter foil. If applied, Cu  $K \alpha_2$  radiation was removed arithmetically using the Panalytical HighScore Plus software package. Peak positions and profile were fitted with Pseudo-Voigt function using the the Panalytical HighScore Plus software package Phase identification was done by using the PDF-2 database of the International Center of Diffraction Data (ICDD).

The TEM measurements were performed at 200kV with an aberration-corrected JEM-ARM200F (JEOL, Corrector: CEOS). The microscope is equipped with a JED-2300 (JEOL) energy-dispersive x-ray-spectrometer (EDXS) for chemical analysis.

The aberration corrected STEM imaging (High-Angle Annular Dark Field (HAADF) and Annular Bright Field (ABF)) were performed under the following conditions. HAADF and ABF both were done with a spot size of approximately 0.13nm, a convergence angle of 30-36° and collection semi-angles for HAADF and ABF of 90-170mrad and 11-22mrad respectively. Preparation of the TEM sample: The sample was deposited without any pretreatment on a holey carbon supported Cu-grid (mesh 300) and transferred to the microscope.

X-ray photoelectron spectra (XPS) were obtained using an ESCALAB250xi spectrometer equipped with a monochromatized Al  $K\alpha$  X-ray radiation source ( $h\nu = 1486.6$  eV) with 20 eV pass energy. All binding energies were calibrated using the C1s peak at 284.8 eV as the reference. The XPS peaks were analyzed using a Shirley-type background and a nonlinear leastsquare fitting of the experimental data based on a mixed Gaussian/Lorentzian peak shape.

The metal precursor  $\text{Co}(\text{OAc})_2 \cdot 4\text{H}_2\text{O}$  was obtained from Sigma-Aldrich. Melamine was purchased from Alfa Aesar. VXC72R was obtained from Cabot. All reagents were used directly without further purification prior to use.

## **2. Procedure for the Preparation of Catalyst Co/Melamine-2@C-700**

Co(OAc)<sub>2</sub>·4H<sub>2</sub>O (126.8 mg, 0.5 mmol) and melamine (127.0 mg, 1.0 mmol) (Co:melamine = 1:2 molar ratio) were stirred in water (30 mL) at 80 °C for 1 hour. The support VXC72R (746.2 mg) was then added and the mixture was stirred at 80 °C for 15 h. Then the water was removed in vacuum and leaving behind a black solid that was dried at the pump. The sample was grinded to a fine powder which was then transferred to a ceramic crucible and placed in the oven. The latter was evacuated to ca. 5 mbar and then flushed with argon three times. The furnace was heated to 700 °C at a rate of 25 °C per minute and held at 700 °C for 2 hours under argon atmosphere. After the heating was switched off the oven was allowed to reach room temperature. During the whole process argon was constantly passed through the oven.

### **3. General Procedure for the Hydrogenation of Quinolines**

The catalytic activity tests were performed in a 40 ml sealed tube. Quinolines **1** (0.5 mmol) formic acid (6-10 eq.) and cobalt catalyst (60 mg) were mixed with 1.5 mL toluene. The closed reaction tube was placed into the oil bath at 130 °C for 24 h. After completion of the reaction time, the sealed tube was cooled to room temperature. The crude reaction mixture was purified by flash chromatography on silicone gel (eluent: hexane / ethyl acetate) to afford corresponding products **2**.

### **4. Procedure for Catalyst Recycling**

In a reaction tube (40 mL), quinoline **1a** (0.5 mmol) with Co/Melamine-2@C-700 (60 mg) was mixed with 1.5 mL toluene. The closed reaction tube was placed into the oil bath at 130 °C for 24 h. After completion of the reaction time, the sealed tube was cooled to room temperature. 50  $\mu$ L dodecane was added into the solution and the yield was determined by GC analysis. The catalyst was isolated by centrifugation and reused for next reaction.

## 5. STEM Measurements of Catalyst

### 5.1 STEM Measurements of Co/Melamine-2@C-700

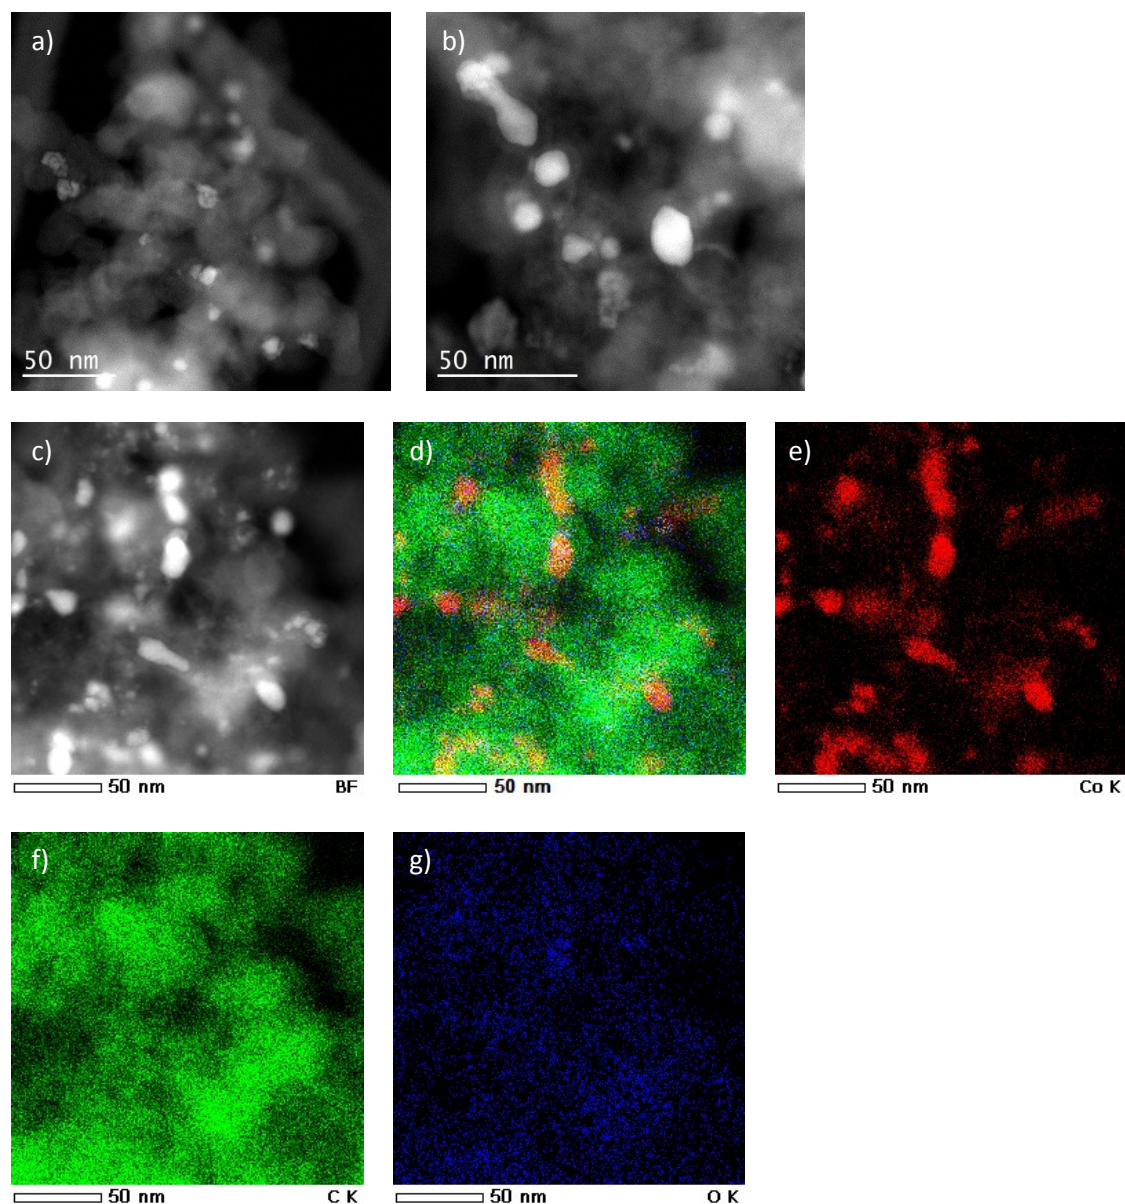

**Figure S2.** STEM measurements of Co/Melamine-2@C-700: a-c) HAADF images showing the variety of Co-containing particles such as metallic cobalt with graphene structure and cobalt oxide particles attached to the support, d-g) STEM-EDX mapping of the previous catalyst region showing the carbon/cobalt structure present in the fresh specimen: d) overlay of cobalt (red), carbon (green) and oxygen (blue) maps, e) cobalt map, f) carbon map, g) oxygen map.

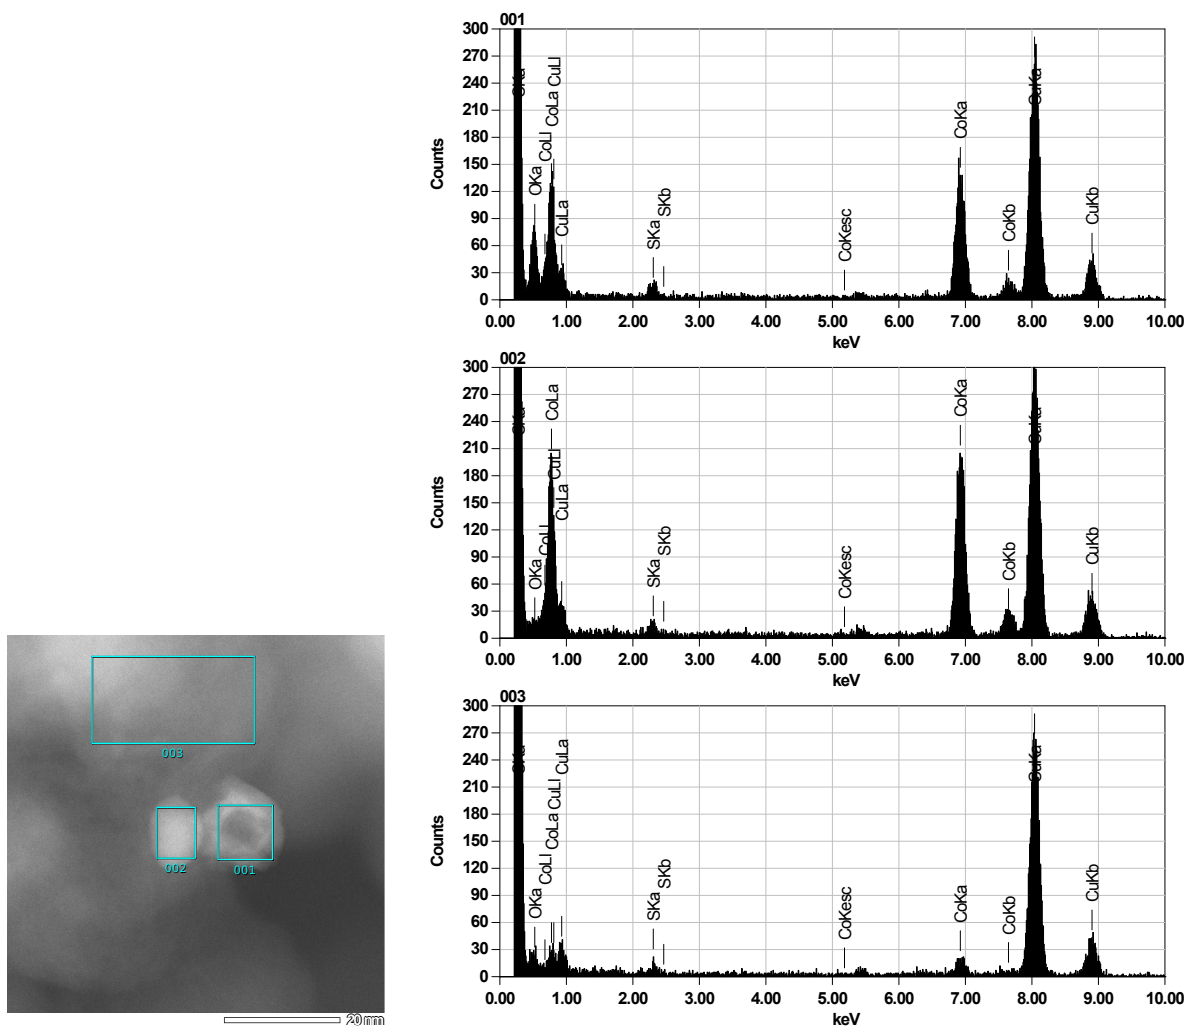

**Figure S3.** HAADF-STEM and EDX measurements of the indicated areas of Co/Melamine-2@C-700 show the spectral differences between the metallic and the oxidic Co particles (001 and 002) but also a remaining Co signal in an area of carbon support.

## 5.2 STEM Measurements of Co/Melamine-2@C-400

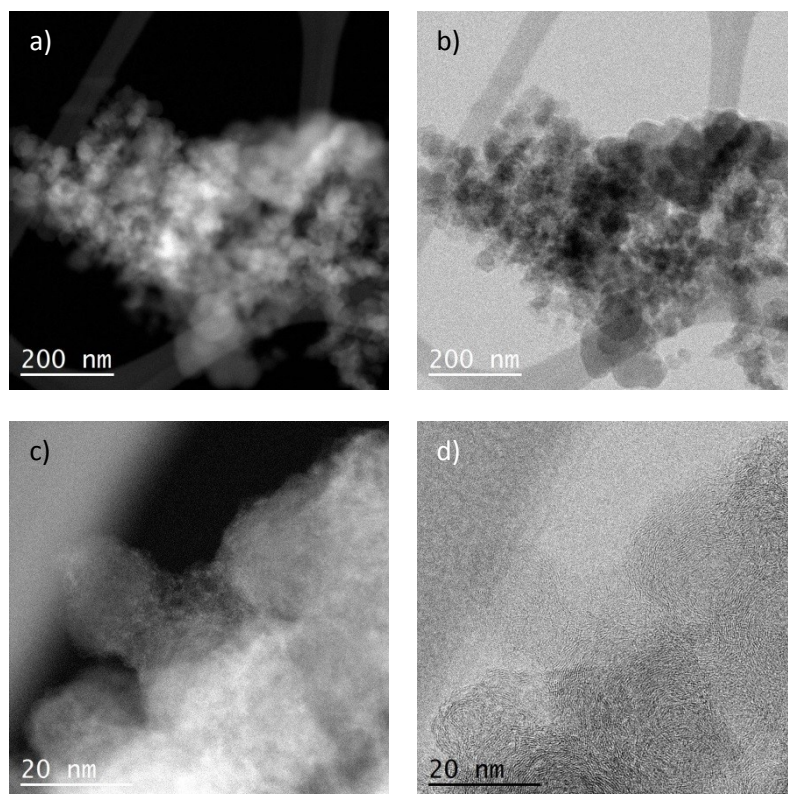

**Figure S4.** STEM measurements of Co/Melamine-2@C-400: a) high angle annular dark field (HAADF) overview of Co/Melamine-2@C-400, b) annular bright field (ABF) images of Co/Melamine-2@C-400, no cobalt particles were observed, c-d) images showing details of the carbon phase of Co/Melamine-2@C-400.

## Area 01

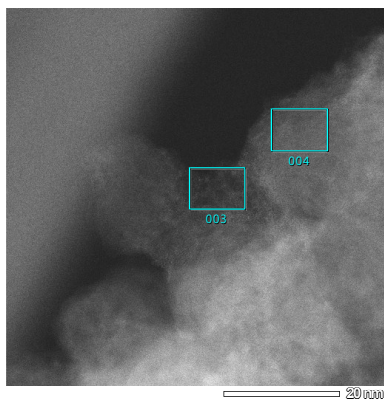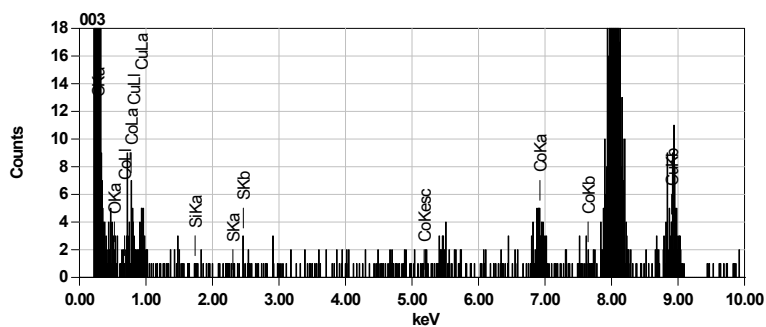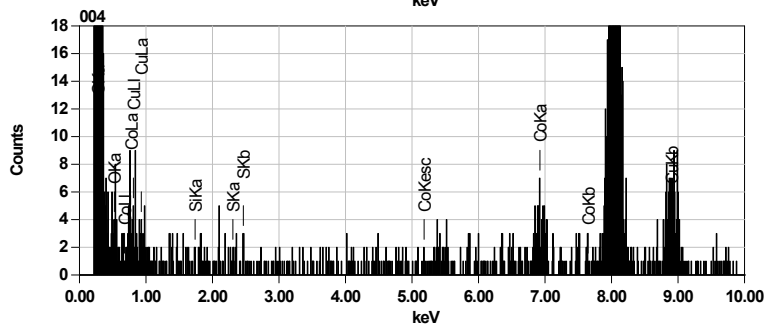

## Area 02

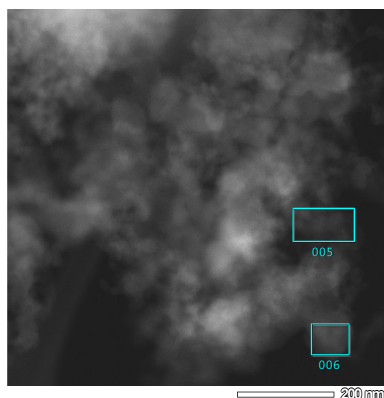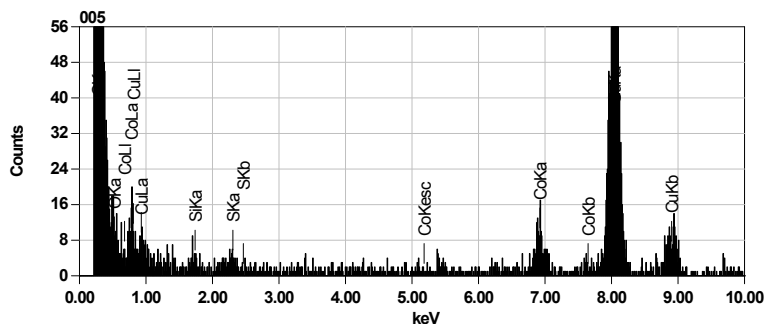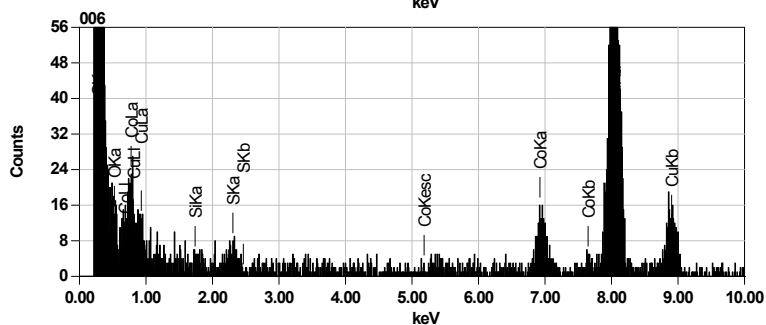

**Figure S5.** HAADF-STEM and EDX measurements of different areas of Co/Melamine-2@C-400 indicating the presence of finely distributed Co.



### 5.3 STEM Measurements of Co/Melamine-2@C-700 after 4 runs

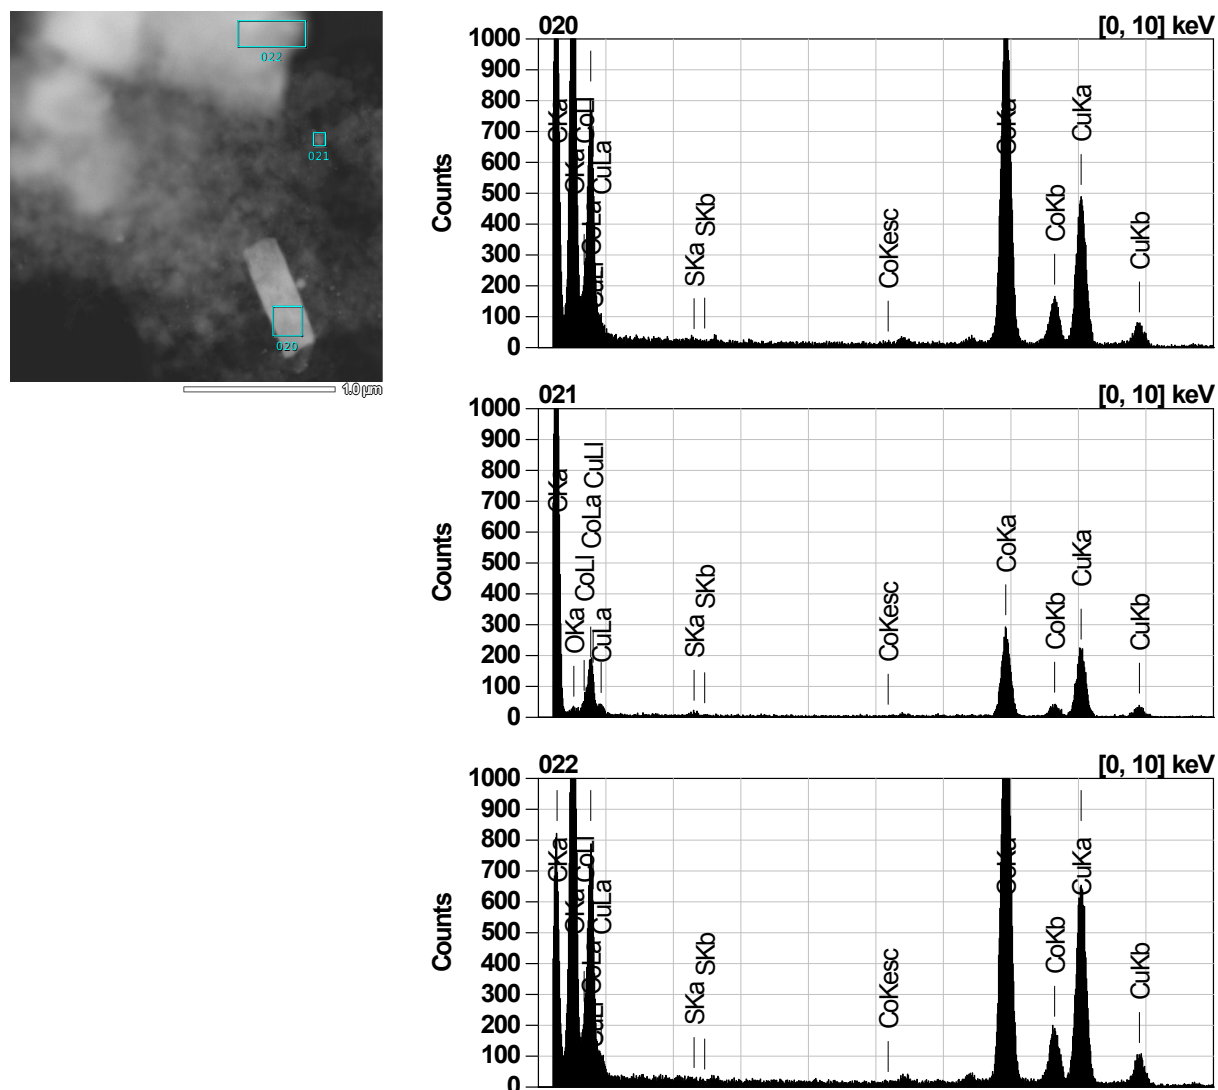

**Figure S6.** HAADF-STEM and EDX measurements of different areas of Co/Melamine-2@C-700 after 4 runs indicating the presence of large cobalt oxide particle.

## 6. XPS Measurements of Catalyst

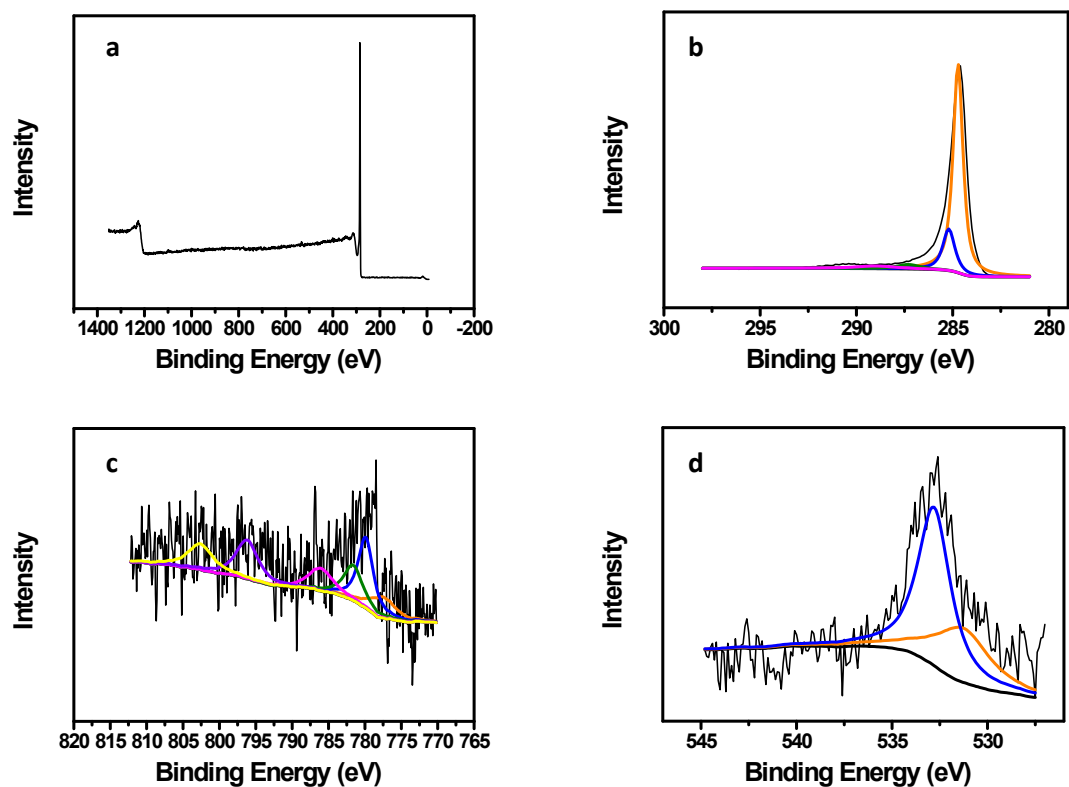

**Figure S7.** XPS Measurements of Co/Melamine-2@C-700. (a) survey (b) C1s (c) Co2p (d) O1s.

**Table S1.** XPS Measurements of different catalysts

| entry | catalyst            | Co   | N    | C     | O    |
|-------|---------------------|------|------|-------|------|
| 1     | Co/Melamine-2/C-800 | 0.26 | 1.21 | 97.25 | 1.28 |
| 2     | Co/Melamine-2/C-700 | 0.37 | 1.15 | 96.84 | 1.65 |
| 3     | Co/Melamine-2/C-600 | 0.27 | 1.29 | 96.97 | 1.47 |
| 4     | Co/Melamine-2/C-500 | 0.46 | 3.21 | 94.80 | 1.53 |
| 5     | Co/Melamine-2/C-400 | 0.68 | 5.84 | 91.70 | 1.78 |
| 6     | Co/Melamine-1/C-700 | 0.33 | 1.10 | 97.15 | 1.42 |
| 7     | Co/Melamine-6/C-700 | 0.34 | 1.52 | 96.78 | 1.36 |

## 7. Hydrogen Production under Different Catalytic Systems

The reaction of 1.4 g HCOOH in 18.0 g toluene with or without catalyst was conducted in autoclave ( ) for 40 h. The amount of gas which was formed after reaction was detected by GC after the autoclave cooled to room temperature.

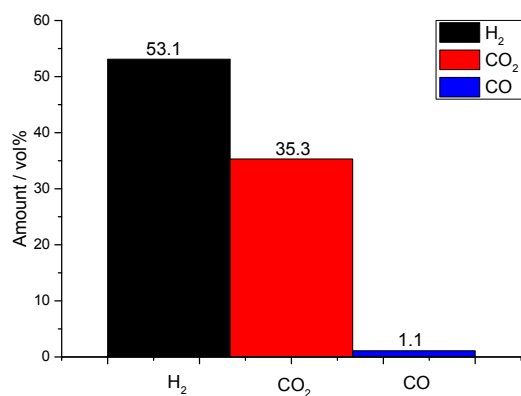

**Figure S8.** With Co/Mel(2)/C-700 at 130 °C (7.0 bar after cooling to room temperature)

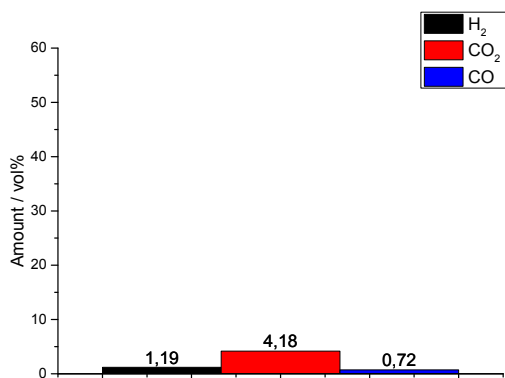

**Figure S9.** With Co<sub>3</sub>O<sub>4</sub> at 130 °C (1.4 bar after cooling to room temperature)

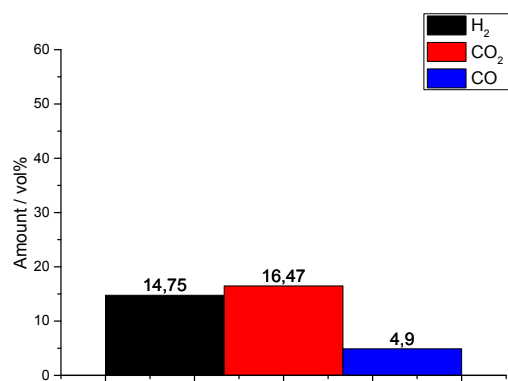

**Figure S10.** With Co(OAc)<sub>2</sub> at 130 °C (1.3 bar after cooling to room temperature)

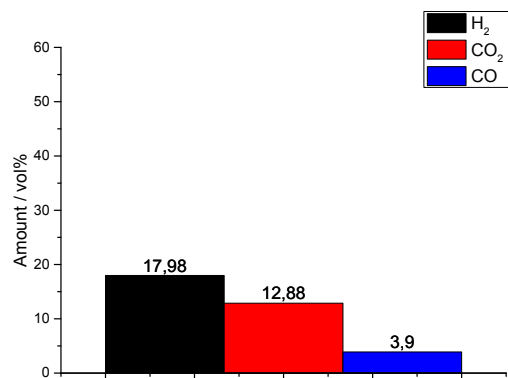

**Figure S11.** Without catalyst at 130 °C (1.3 bar after cooling to room temperature)

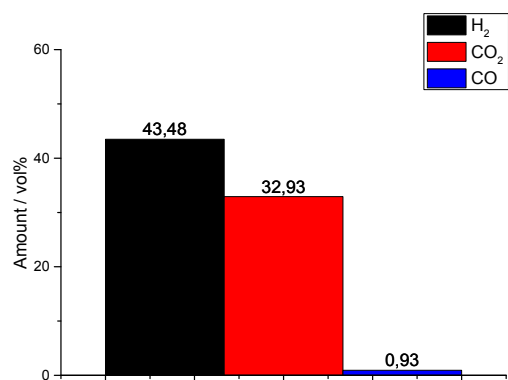

**Figure S12.** With Co/Mel(2)/C-700 at 110 °C (3.9 bar after cooling to room temperature)

## 8. Deuterated Experiments

The deuterated experiments were performed in a 40 ml sealed tube. Quinolines **1** (0.5 mmol), DCOOD (6 eq.) and cobalt catalyst (60 mg) were mixed with 1.5 mL toluene-d<sub>8</sub>. The closed reaction tube was placed into the oil bath at 130 °C for 18 h. Then the sealed tube was cooled to room temperature. 1,1,2,2-tetrachloroethane (0.5 mmol) was added into the mixture and the crude reaction mixture was analyzed by NMR.

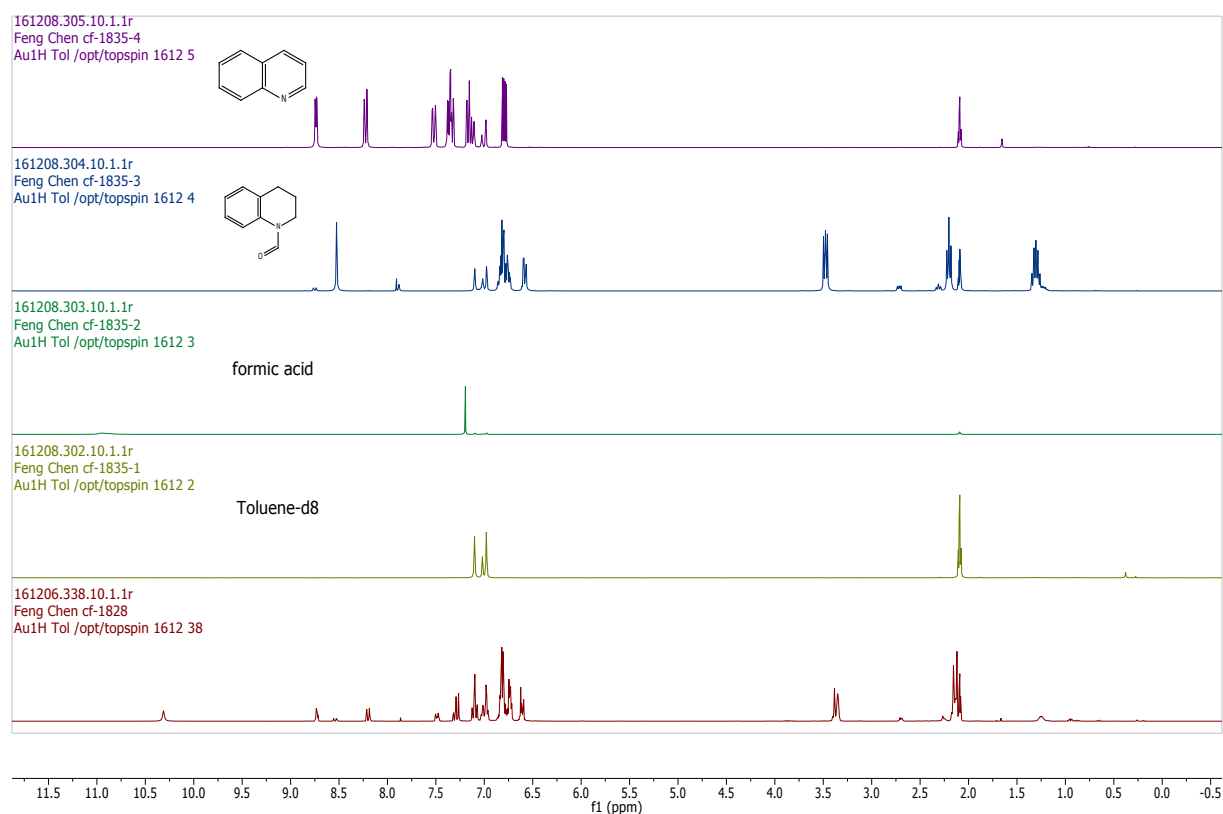

**Figure S13.** NMR spectrum in toluene-d<sub>8</sub>

161207.345.10.1.1r  
Feng Chen cf-1828-S  
Au1H Tol /opt/topspin 1612 45

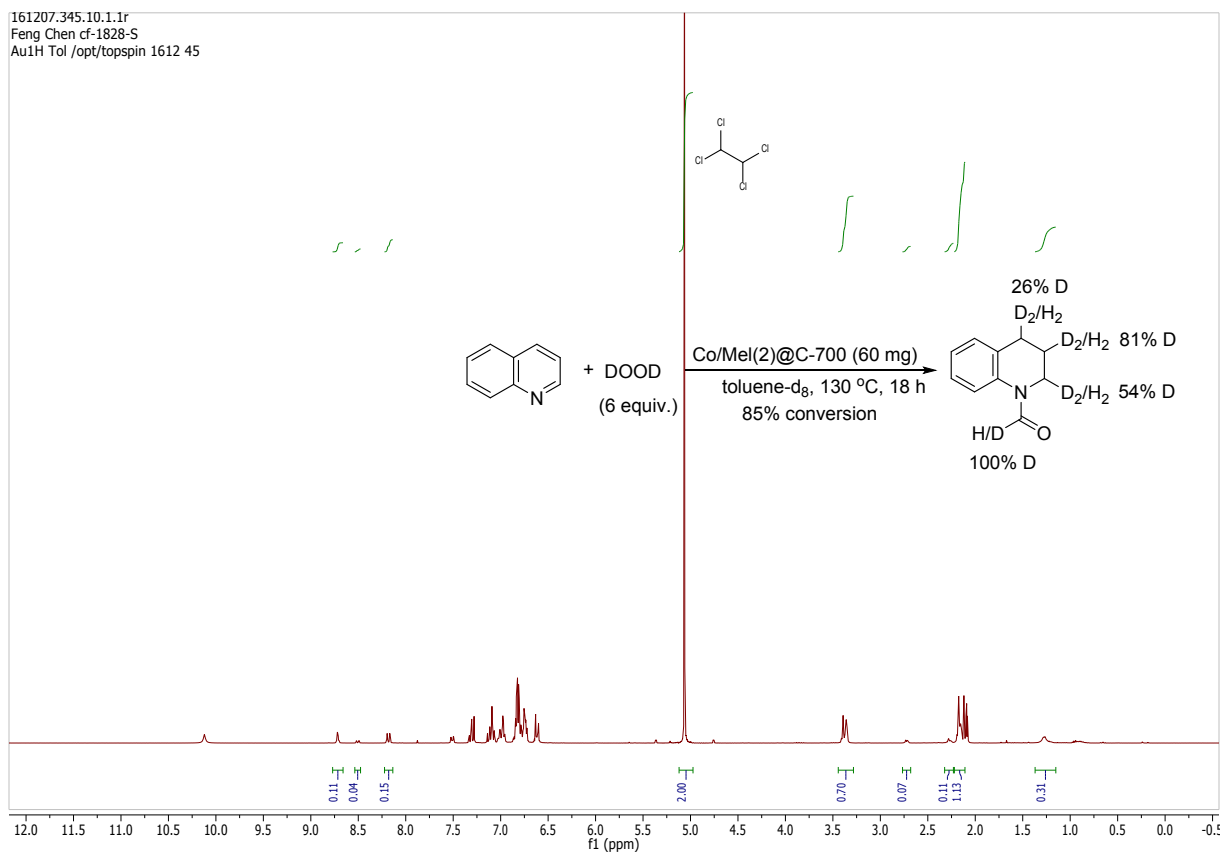

**Figure S14.** NMR spectrum of 1a with DCOOD in toluene-d<sub>8</sub> after reaction

161207.344.10.1.1r  
Feng Chen cf-1829-S  
Au1H Tol /opt/topspin 1612 44

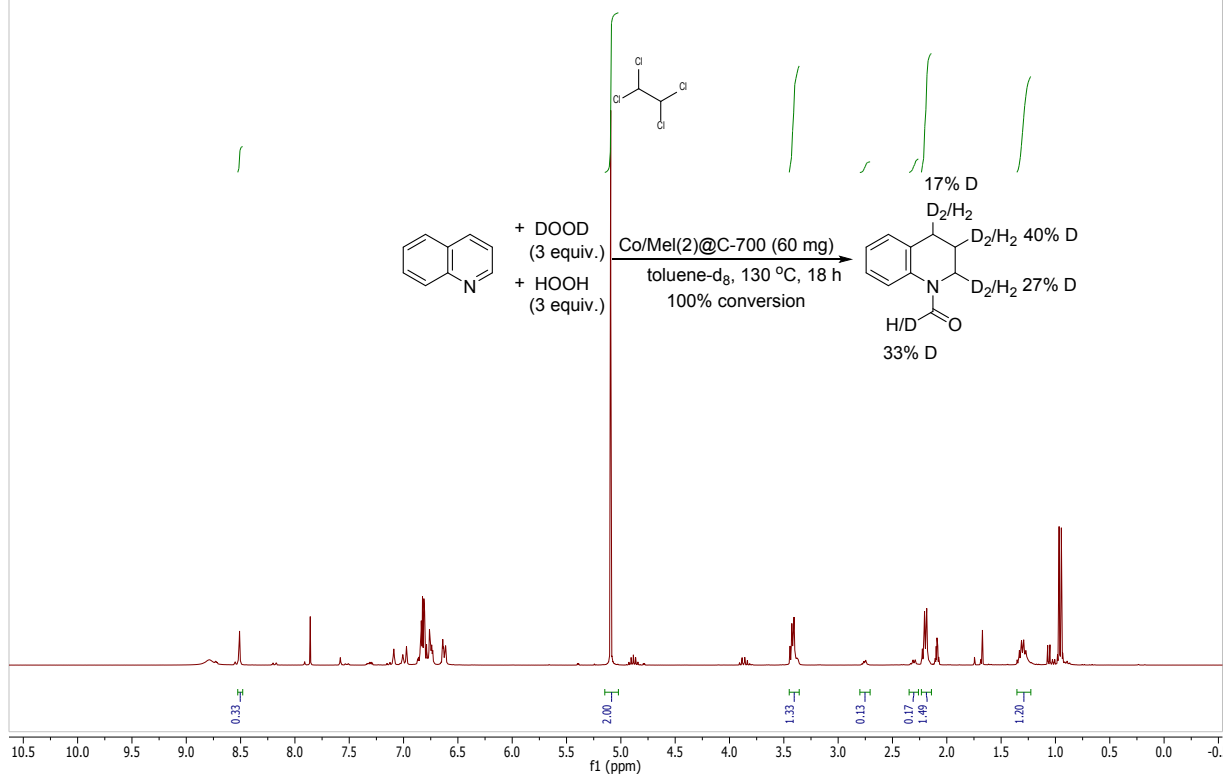

**Figure S15.** NMR spectrum of 1a with DCOOD/HCOOH mixture in toluene-d<sub>8</sub> after reaction

## 9. Characterization Data for the Substrate and Products

### Synthesis of Substrate 1w:

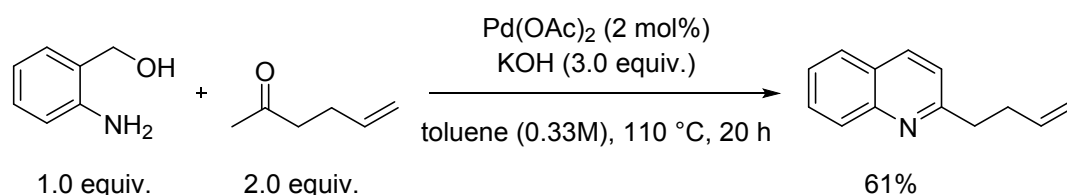

In a sealed Schlenk tube equipped with a magnetic stir bar, (2-aminophenyl)methanol (616 mg, 5.00 mmol), hex-5-en-2-one (1.16 mL, 10.0 mmol, 2.00 equiv.), palladium acetate (22.5 mg, 0.10 mmol, 0.02 equiv.) and potassium hydroxide (842 mg, 15.0 mmol, 3.00 equiv.) were dissolved in toluene (15 mL). The resulting reaction mixture was heated at 110 °C for 20 h. After cooling to rt, the reaction mixture was concentrated under reduced pressure and purified by flash column chromatography over silica gel (eluent: hexane/ethylacetate = 9/1) to afford pure product **1w** as a pale yellow liquid (559 mg, 3.05 mmol, 61%).

**<sup>1</sup>H NMR (400 MHz, CDCl<sub>3</sub>):** δ (ppm): 8.06 (d, *J* = 8.3 Hz, 2H), 7.77 (dd, *J* = 8.0, 1.15 Hz, 1H), 7.68 (ddd, *J* = 8.5, 6.9, 1.5 Hz, 1H), 7.48 (ddd, *J* = 8.1, 6.9, 1.2 Hz, 1H), 7.29 (d, *J* = 8.4 Hz, 1H), 5.93 (ddt, *J* = 16.9, 10.1, 6.6 Hz, 1H), 5.06 - 5.11 (m, 1H), 4.98 - 5.01 (m, 1H), 3.06 - 3.10 (m, 2H), 2.56 - 2.63 (m, 2H); **<sup>13</sup>C NMR (101 MHz, CDCl<sub>3</sub>):** δ (ppm): 162.1, 148.0, 137.8, 136.4, 129.5, 128.9, 126.9, 125.9, 121.5, 115.4, 38.6, 33.9; **HR-MS (EI):** *m/z* calculated for [C<sub>13</sub>H<sub>13</sub>N]<sup>+</sup> ([M]<sup>+</sup>): 183.1043, found: 183.1039.

### 8-fluoro-3,4-dihydroquinoline-1(2H)-carbaldehyde (**2b**)

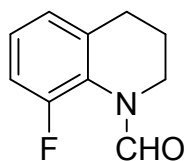

**Reaction Conditions:** 8-fluoroquinoline (75.8 mg, 0.50 mmol), HCOOH (10.0 equiv.), Co/Melamine-2@C-700 (60 mg), Toluene (1.5 mL), 130 °C, 24 h; **Isolated Yield:** 86.2 mg, 95% (purified as white solid by flash column chromatography over silica gel with hexane/ethyl acetate = 4/1); **<sup>1</sup>H NMR (300 MHz, CDCl<sub>3</sub>):** δ (ppm): 8.63 (d, *J* = 4.8 Hz, 1H), 6.84-6.99 (m, 3H), 3.74 (t, *J* = 6.3 Hz, 2H), 2.74 (t, *J* = 6.6 Hz, 2H), 1.89 (quintet, *J* = 6.3 Hz, 2H); **<sup>13</sup>C NMR (75 MHz, CDCl<sub>3</sub>):** δ (ppm): 163.2 (d, *J* = 12.8 Hz), 154.2 (d, *J* = 243.8 Hz), 133.4, 124.9 (d, *J* = 8.3 Hz), 124.6 (d, *J* = 3.2 Hz), 114.6 (d, *J* = 21.6 Hz), 40.1, 27.1, 22.7; **HR-MS (ESI):** *m/z* calculated for [C<sub>10</sub>H<sub>10</sub>FNONa]<sup>+</sup> ([M+Na]<sup>+</sup>): 202.0639, found: 202.0639.



### 6-chloro-3,4-dihydroquinoline-1(2H)-carbaldehyde (2c)

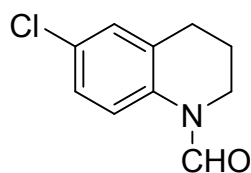

**Reaction Conditions:** 6-chloroquinoline (82.6 mg, 0.50 mmol), HCOOH (10.0 equiv.), Co/Melamine-2@C-700 (60 mg), Toluene (1.5 mL), 130 °C, 24 h; **Isolated Yield:** 95.2 mg, 97% (purified as colorless oil by flash column chromatography over silica gel with hexane/ethyl acetate = 4/1); **<sup>1</sup>H NMR (300 MHz, CDCl<sub>3</sub>) (major conformer):** δ (ppm): 8.67 (s, 1H), 6.98-7.11 (m, 3H), 3.72 (t, *J* = 6.0 Hz, 2H), 2.72 (t, *J* = 6.3 Hz, 2H), 1.87 (quintet, *J* = 6.3 Hz, 2H); **<sup>13</sup>C NMR (75 MHz, CDCl<sub>3</sub>) (major conformer):** δ (ppm): 160.7, 135.8, 130.5, 129.8, 129.4, 127.1, 118.1, 40.2, 27.0, 21.9; **HR-MS (ESI):** *m/z* calculated for [C<sub>10</sub>H<sub>10</sub>ClN<sub>2</sub>O]<sup>+</sup> ([M+Na]<sup>+</sup>): 218.0343, found: 218.0346.

### 6-bromo-3,4-dihydroquinoline-1(2H)-carbaldehyde (2d)

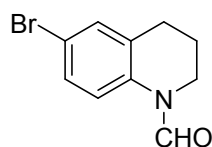

**Reaction Conditions:** 6-bromoquinoline (107.2 mg, 0.5 mmol), TEA (1 equiv.), HCOOH (15.0 equiv.), Co/Melamine-2@C-700 (60 mg), Toluene (1.5 mL), 130 °C, 48 h; **Isolated Yield:** 115.0 mg, 95% (purified as colorless solid by flash column chromatography over silica gel with hexane/ethyl acetate = 3/1); **<sup>1</sup>H NMR (300 MHz, CDCl<sub>3</sub>) (major conformer):** δ (ppm): 8.74 (s, 1H), 7.27-7.31 (m, 2H), 6.98-7.05 (m, 1H), 3.75-3.80 (m, 2H), 2.78 (t, *J* = 6.3 Hz, 2H), 1.93 (quintet, *J* = 6.3 Hz, 2H); **<sup>13</sup>C NMR (75 MHz, CDCl<sub>3</sub>) (major conformer):** δ (ppm): 160.7, 136.3, 132.3, 130.9, 130.0, 118.4, 117.4, 40.2, 26.9, 21.9; **HR-MS (EI):** *m/z* calculated for [C<sub>10</sub>H<sub>10</sub>NOBr]<sup>+</sup> ([M]<sup>+</sup>): 238.99403, found: 238.99485.

### 8-Chloro-3,4-dihydroquinoline-1(2H)-carbaldehyde (2e)

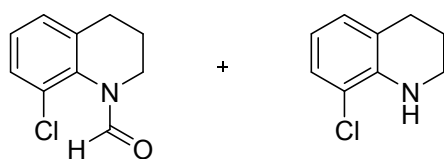

**Reaction Conditions:** 8-chloroquinoline (81.8 mg, 0.50 mmol), HCOOH (20.0 equiv.), Co/Melamine-2@C-700 (80 mg), Toluene (1.5 mL), 130 °C, 40 h; **Isolated Yield:** 8-chloro-3,4-

dihydroquinoline-1(2*H*)-carbaldehyde (colorless oil, 80 mg, 0.41 mmol, 82%) and 8-chloro-1,2,3,4-tetrahydroquinoline (colorless oil, 11 mg, 0.07 mmol, 13%) were obtained (purified by flash column chromatography over silica gel with heptane/ethyl acetate = 4/1)

**8-Chloro-3,4-dihydroquinoline-1(2*H*)-carbaldehyde:**  $^1\text{H NMR}$  (300 MHz,  $\text{CDCl}_3$ ) (major conformer):  $\delta$  (ppm): 8.61 (s, 1H), 7.25 - 7.30 (m, 1H), 7.05 - 7.09 (m, 2H), 3.76 (t,  $J = 6.7$  Hz, 2H), 2.70 (t,  $J = 6.6$  Hz, 2H), 1.94 (quin.,  $J = 6.6$  Hz, 2H);  $^{13}\text{C NMR}$  (75 MHz,  $\text{CDCl}_3$ ) (major conformer):  $\delta$  (ppm): 163.5, 136.0, 135.0, 128.8, 127.2, 126.5, 126.3, 40.0, 27.1, 23.4); **HR-MS (ESI):**  $m/z$  calculated for  $[\text{C}_{10}\text{H}_{10}\text{ClN}^+\text{O}]^+$  ( $[\text{M}+\text{Na}]^+$ ): 218.0343, found: 218.0342.

**8-Chloro-1,2,3,4-tetrahydroquinoline:**  $^1\text{H NMR}$  (300 MHz,  $\text{CDCl}_3$ ):  $\delta$  (ppm): 7.02 - 7.12 (m, 1H), 6.86 (dq,  $J = 7.5, 1.1$  Hz, 1H), 6.52 (t,  $J = 7.7$  Hz, 1H), 4.47 (s, 1H), 3.40 (t,  $J = 5.3$  Hz, 2H), 2.78 (t,  $J = 6.4$  Hz, 2H), 1.90 - 1.98 (m, 2H);  $^{13}\text{C NMR}$  (75 MHz,  $\text{CDCl}_3$ ):  $\delta$  (ppm): 140.7, 127.8, 126.9, 122.8, 118.2, 116.5, 41.9, 27.3, 21.7); **HR-MS (ESI):**  $m/z$  calculated for  $[\text{C}_9\text{H}_{11}\text{ClN}]^+$  ( $[\text{M}+\text{H}]^+$ ): 168.0575, found: 168.0574.

#### 5-fluoro-8-methoxy-3,4-dihydroquinoline-1(2*H*)-carbaldehyde (2f)

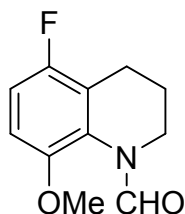

**Reaction Conditions:** 5-fluoro-8-methoxyquinoline (90.3 mg, 0.50 mmol),  $\text{HCOOH}$  (15.0 equiv.), Co/Melamine-2@C-700 (60 mg), Toluene (1.5 mL), 130 °C, 24 h; **Isolated Yield:** 90.2 mg, 86% (purified as white solid by flash column chromatography over silica gel with hexane/ethyl acetate = 3/1);  $^1\text{H NMR}$  (300 MHz,  $\text{CDCl}_3$ ):  $\delta$  (ppm): 8.74 (s, 1H), 6.73-6.83 (m, 3H), 3.78 (s, 3H), 3.73-3.78 (m, 2H), 2.75 (td,  $J = 6.6, 1.2$  Hz, 2H), 1.91 (quintet,  $J = 6.6$  Hz, 2H);  $^{13}\text{C NMR}$  (75 MHz,  $\text{CDCl}_3$ ):  $\delta$  (ppm): 164.0, 154.8 (d,  $J = 236.6$  Hz), 147.4, 128.0 (d,  $J = 7.2$  Hz), 119.6 (d,  $J = 21.5$  Hz), 110.6, 110.2 (d,  $J = 9.5$  Hz), 56.3, 39.3, 22.0, 20.2 (d,  $J = 3.5$  Hz);  $^{19}\text{F NMR}$  (282.4 MHz,  $\text{CDCl}_3$ ):  $\delta$  (ppm): -126.02; **HR-MS (ESI):**  $m/z$  calculated for  $[\text{C}_{11}\text{H}_{12}\text{FNO}_2\text{Na}]^+$  ( $[\text{M}+\text{Na}]^+$ ): 232.0744, found: 232.0745.

#### 8-methyl-3,4-dihydroquinoline-1(2*H*)-carbaldehyde (2g)

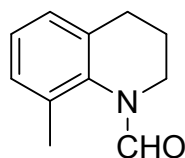

**Reaction Conditions:** 8-methylquinoline (72.2 mg, 0.50 mmol), HCOOH (10.0 equiv.), Co/Melamine-2@C-700 (60 mg), Toluene (1.5 mL), 130 °C, 24 h; **Isolated Yield:** 70.0 mg, 80% (purified as colorless oil by flash column chromatography over silica gel with hexane/ethyl acetate = 4/1); **<sup>1</sup>H NMR (300 MHz, CDCl<sub>3</sub>):** δ (ppm): 8.40 (s, 1H), 7.05-7.20 (m, 3H), 3.85 (t, *J* = 6.9 Hz, 2H), 2.74 (t, *J* = 6.6 Hz, 1H), 2.39 (s, 3H), 2.00 (quintet, *J* = 6.6 Hz, 2H); **<sup>13</sup>C NMR (75 MHz, CDCl<sub>3</sub>):** δ (ppm): 163.5, 136.7, 134.5, 130.0, 129.8, 126.1, 125.6, 40.1, 27.0, 23.5, 18.7; **HR-MS (ESI):** *m/z* calculated for [C<sub>11</sub>H<sub>13</sub>NONa]<sup>+</sup> ([M+Na]<sup>+</sup>): 198.0889, found: 198.0891.

### 8-ethoxy-3,4-dihydroquinoline-1(2H)-carbaldehyde (2h)

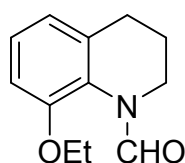

**Reaction Conditions:** 8-ethoxyquinoline (87.4 mg, 0.50 mmol), HCOOH (10.0 equiv.), Co/Melamine-2@C-700 (60 mg), Toluene (1.5 mL), 130 °C, 24 h; **Isolated Yield:** 98.0 mg, 95% (purified as colorless oil by flash column chromatography over silica gel with hexane/ethyl acetate = 3/1); **<sup>1</sup>H NMR (300 MHz, CDCl<sub>3</sub>):** δ (ppm): 8.81 (s, 1H), 7.09 (t, *J* = 7.8 Hz, 1H), 6.76-6.93 (m, 2H), 4.08 (q, *J* = 6.9 Hz, 2H), 3.83 (t, *J* = 6.3 Hz, 2H), 2.78 (t, *J* = 6.3 Hz, 2H), 1.98 (quintet, *J* = 6.3 Hz, 2H), 1.45 (t, *J* = 6.9 Hz, 2H); **<sup>13</sup>C NMR (75 MHz, CDCl<sub>3</sub>):** δ (ppm): 164.4, 150.7, 133.4, 126.8, 125.2, 121.0, 111.1, 64.5, 40.0, 27.1, 23.2, 14.7; **HR-MS (ESI):** *m/z* calculated for [C<sub>12</sub>H<sub>15</sub>NO<sub>2</sub>Na]<sup>+</sup> ([M+Na]<sup>+</sup>): 228.0995, found: 228.0996.

### 6-Hydroxy-3,4-dihydroquinoline-1(2H)-carbaldehyde (2i)

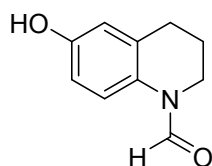

**Reaction Conditions:** quinolin-6-ol (72.6 mg, 0.50 mmol), HCOOH (10.0 equiv.), Co/Melamine-2@C-700 (60 mg), Toluene (1.5 mL), 130 °C, 24 h; **Isolated Yield:** 73 mg, 0.41 mmol, 82% (purified as white solid by flash column chromatography over silica gel with heptane/ethyl acetate = 2/1 to 1/1); **<sup>1</sup>H NMR (300 MHz, DMSO-*d*<sub>6</sub>) (major conformer):** δ (ppm): 9.23 (s, 1H), 8.65 (s, 1H), 7.13 - 7.16 (m, 1H), 6.56 - 6.59 (m, 2H), 3.62 (t, *J* = 6.1 Hz, 2H), 2.68 (t, *J* = 6.4 Hz, 2H), 1.79 (quin, *J* = 6.3 Hz, 2H); **<sup>13</sup>C NMR (75 MHz, DMSO-*d*<sub>6</sub>) (major conformer):** δ (ppm): 160.7, 154.0, 129.7, 129.0, 118.4, 115.5, 113.7, 40.1, 26.6, 22.0 (N.B.: δ (ppm) = 40.1 was detected by DEPT analysis); **HR-MS (ESI):** *m/z* calculated for [C<sub>10</sub>H<sub>11</sub>NO<sub>2</sub>Na]<sup>+</sup> ([M+Na]<sup>+</sup>): 200.0682, found: 200.0680.

### 8-Hydroxy-3,4-dihydroquinoline-1(2H)-carbaldehyde (2j)

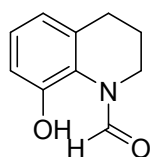

**Reaction Conditions:** quinolin-8-ol (72.6 mg, 0.50 mmol), HCOOH (15.0 equiv.), Co/Melamine-2@C-700 (60 mg), Toluene (1.5 mL), 130 °C, 40 h; **Isolated Yield:** 76 mg, 0.43 mmol, 86% (purified as white solid by flash column chromatography over silica gel with heptane/ethyl acetate = 2/1); **<sup>1</sup>H NMR (300 MHz, DMSO-*d*<sub>6</sub>) (major conformer):** δ (ppm): 9.83 (s, 1H), 8.67 (s, 1H), 6.90 (t, *J* = 7.7 Hz, 1H), 6.79 (dd, *J* = 8.1, 1.5 Hz, 1H), 6.65 (d, *J* = 7.3 Hz, 1H), 3.60 (t, *J* = 6.4 Hz, 2H), 2.65 (t, *J* = 6.5 Hz, 2H), 1.80 (quin, *J* = 6.4 Hz, 2H); **<sup>13</sup>C NMR (75 MHz, DMSO-*d*<sub>6</sub>) (major conformer):** δ (ppm): 163.4, 148.8, 133.1, 125.2, 124.8, 119.4, 114.4, 39.5, 26.6, 22.9 (N.B.: δ (ppm) = 39.5 was detected by DEPT analysis); **HR-MS (ESI):** *m/z* calculated for [C<sub>10</sub>H<sub>11</sub>NO<sub>2</sub>Na]<sup>+</sup> ([M+Na]<sup>+</sup>): 200.0682, found: 200.0681.

### Methyl 1-formyl-1,2,3,4-tetrahydroquinoline-6-carboxylate (2k)

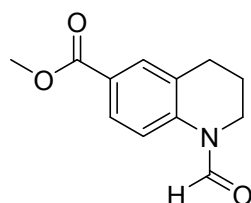

**Reaction Conditions:** methyl quinoline-6-carboxylate (72.6 mg, 0.50 mmol), HCOOH (10.0 equiv.), Co/Melamine-2@C-700 (60 mg), Toluene (1.5 mL), 130 °C, 24 h; **Isolated Yield:** 100 mg, 0.45 mmol, 90% (purified as white solid by flash column chromatography over silica gel with heptane/ethyl acetate = 4/1); **<sup>1</sup>H NMR (300 MHz, CDCl<sub>3</sub>) (major conformer):** δ (ppm): 8.83 (s, 1H), 7.78 - 7.79 (m, 2H), 7.15 - 7.18 (m, 1H), 3.84 (s, 3H), 3.76 (t, *J* = 6.0 Hz, 2H), 2.79 (t, *J* = 6.4 Hz, 2H), 1.91 (quin, *J* = 6.3 Hz, 2H); **<sup>13</sup>C NMR (75 MHz, CDCl<sub>3</sub>) (major conformer):** δ (ppm): 166.4, 160.8, 141.2, 131.1, 128.6, 128.3, 125.8, 116.1, 52.0, 40.5, 27.2, 21.7; **HR-MS (ESI):** *m/z* calculated for [C<sub>12</sub>H<sub>13</sub>NO<sub>3</sub>Na]<sup>+</sup> ([M+Na]<sup>+</sup>): 242.0788, found: 242.0785.

### 7-Fluoro-2-methyl-3,4-dihydroquinoline-1(2H)-carbaldehyde (2l)

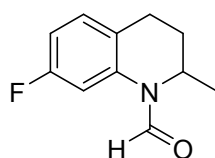

**Reaction Conditions:** 7-fluoro-2-methylquinoline (80.6 mg, 0.50 mmol), HCOOH (10.0 equiv.), Co/Melamine-2@C-700 (60 mg), Toluene (1.5 mL), 130 °C, 24 h; **Isolated Yield:** 90 mg, 0.47 mmol, 93% (purified as colorless oil by flash column chromatography over silica gel with heptane/ethyl acetate = 4/1); **<sup>1</sup>H NMR (300 MHz, CDCl<sub>3</sub>) (major conformer):** δ (ppm): 8.63 (s, 1H), 7.06 - 7.11 (m, 1H), 6.74 - 6.85 (m, 2H), 4.77 (sextet, *J* = 6.2 Hz, 1H), 2.72 - 2.83 (m, 1H), 2.58 - 2.67 (m, 1H), 1.97 - 2.08 (m, 1H), 1.62 - 1.72 (m, 1H), 1.16 (d, *J* = 6.6 Hz, 3H); **<sup>13</sup>C NMR (75 MHz, CDCl<sub>3</sub>) (major conformer):** δ (ppm): 161.5 (d, *J* = 244.5 Hz), 160.7, 137.2 (d, *J* = 9.7 Hz), 130.3 (d, *J* = 9.0 Hz), 124.7 (d, *J* = 3.2 Hz), 111.3 (d, *J* = 21.2 Hz), 105.3 (d, *J* = 25.2 Hz), 44.9, 28.6, 23.4, 17.9; **<sup>19</sup>F NMR (282.4 MHz, CDCl<sub>3</sub>):** δ (ppm): -113.85; **HR-MS (ESI):** *m/z* calculated for [C<sub>11</sub>H<sub>12</sub>FNONa]<sup>+</sup> ([M+Na]<sup>+</sup>): 216.0795, found: 216.0796.

### 1-formyl-1,2,3,4-tetrahydroquinoline-6-carbonitrile (2m)

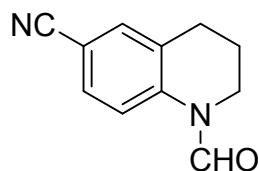

**Reaction Conditions:** quinoline-6-carbonitrile (81.0 mg, 0.50 mmol), HCOOH (10.0 equiv.), Co/Melamine-2@C-700 (60 mg), Toluene (1.5 mL), 130 °C, 24 h; **Isolated Yield:** 67.0 mg, 72% (purified as white solid by flash column chromatography over silica gel with hexane/ethyl acetate = 2/1); **<sup>1</sup>H NMR (400 MHz, CDCl<sub>3</sub>) (major conformer):** δ (ppm): 8.91 (s, 1H), 7.47-7.54 (m, 2H), 7.30 (d, *J* = 8.4 Hz, 1H), 3.86 (t, *J* = 6.0 Hz, 2H), 2.88 (t, *J* = 6.4 Hz, 2H), 2.01 (t, *J* = 6.4 Hz, 2H); **<sup>13</sup>C NMR (100 MHz, CDCl<sub>3</sub>) (major conformer):** δ (ppm): 160.6, 141.2, 133.4, 131.1, 129.4, 118.5, 116.8, 107.5, 40.5, 27.0, 21.3; **HR-MS (ESI):** *m/z* calculated for [C<sub>11</sub>H<sub>10</sub>N<sub>2</sub>ONa]<sup>+</sup> ([M+Na]<sup>+</sup>): 209.0685, found: 209.0686.

### 1-formyl-1,2,3,4-tetrahydroquinoline-6-carboxylic acid (2n)

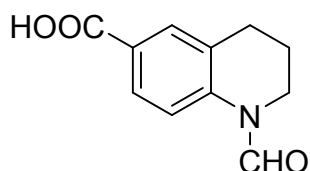

**Reaction Conditions:** quinoline-6-carboxylic acid (86.5 mg, 0.50 mmol), HCOOH (10.0 equiv.), Co/Melamine-2@C-700 (60 mg), Toluene (1.5 mL), 130 °C, 24 h; **Isolated Yield:** 70.8 mg, 65% (purified as white solid by flash column chromatography over silica gel with ethyl acetate); **<sup>1</sup>H NMR (300 MHz, DMSO-d<sub>6</sub>) (major conformer):** δ (ppm): 12.8 (s, 1H), 8.98 (s, 1H), 7.71-7.79 (m, 2H),

7.54 (d,  $J = 8.7$  Hz, 1H), 3.70 (t,  $J = 6.0$  Hz, 2H), 2.82 (t,  $J = 6.3$  Hz, 2H), 1.85 (quintet,  $J = 6.3$  Hz, 2H);  $^{13}\text{C}$  NMR (75 MHz, DMSO- $d_6$ ) (major conformer):  $\delta$  (ppm): 166.9, 161.5, 141.1, 130.7, 128.2, 127.9, 125.7, 116.4, 40.0, 26.9, 21.2; HR-MS (EI):  $m/z$  calculated for  $[\text{C}_{11}\text{H}_{11}\text{NO}_3]^+$  ( $[\text{M}]^+$ ): 205.07334, found: 205.07452.

### 1-formyl-1,2,3,4-tetrahydroquinolin-6-yl trifluoromethanesulfonate (2o)

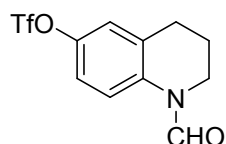

**Reaction Conditions:** quinolin-6-yl trifluoromethanesulfonate (141.5 mg, 0.5 mmol), HCOOH (15.0 equiv.), Co/Melamine-2@C-700 (100 mg), Toluene (1.5 mL), 130 °C, 50 h; **Isolated Yield:** 108.5 mg, 70% (purified as colorless oil by flash column chromatography using Combi Flash Rf+);  **$^1\text{H}$  NMR (300 MHz,  $\text{CDCl}_3$ ) (major conformer):**  $\delta$  (ppm): 8.78 (s, 1H), 7.16-7.23 (m, 1H), 7.08-7.16 (m, 2H), 3.77-3.88 (m, 2H), 2.85 (t,  $J = 6.3$  Hz, 2H), 1.98 (quintet,  $J = 6.3$  Hz, 2H);  **$^{13}\text{C}$  NMR (75 MHz,  $\text{CDCl}_3$ ) (major conformer):**  $\delta$  (ppm): 160.8, 145.8, 137.4, 131.1, 122.4, 120.0, 118.2, 40.2, 27.2, 21.6; **HR-MS (EI):**  $m/z$  calculated for  $[\text{C}_{11}\text{H}_{10}\text{F}_3\text{NO}_4\text{S}]^+$  ( $[\text{M}]^+$ ): 309.02771, found: 309.02705.

### 2-Methyl-3,4-dihydroquinoline-1(2H)-carbaldehyde (2p)

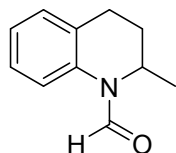

**Reaction Conditions:** 2-methylquinoline (71.6 mg, 0.50 mmol), HCOOH (10.0 equiv.), Co/Melamine-2@C-700 (60 mg), Toluene (1.5 mL), 130 °C, 24 h; **Isolated Yield:** 87 mg, 0.50 mmol, 99% (purified as colorless oil by flash column chromatography over silica gel with heptane/ethyl acetate = 4/1);  **$^1\text{H}$  NMR (300 MHz,  $\text{CDCl}_3$ ) (major conformer):**  $\delta$  (ppm): 8.67 (s, 1H), 7.09 - 7.24 (m, 4H), 4.80 (sextet,  $J = 6.3$  Hz, 1H), 2.83 (ddd,  $J = 16.4, 9.1, 5.5$  Hz, 1H), 2.69 (ddd,  $J = 16.3, 6.4, 5.3$  Hz, 1H), 2.07 - 2.18 (m, 1H), 1.64 - 1.74 (m, 1H), 1.21 (d,  $J = 6.6$  Hz, 3H);  **$^{13}\text{C}$  NMR (75 MHz,  $\text{CDCl}_3$ ) (major conformer):**  $\delta$  (ppm): 161.2, 136.3, 129.9, 129.2, 127.3, 124.9, 118.5, 45.3, 29.3, 24.3, 18.2; **GC-MS: EI-MS [ $m/z$  (%)]:** ( $\text{M}^+ = 175$ ) major peaks found: 176 (10), 175 (81), 160 (62), 146 (19), 133 (11), 132 (100), 131 (14), 130 (24), 117 (23), 104 (104), 77 (19). The obtained spectroscopic data were in agreement with the reported data for this compound [ref.1]

#### 4-methyl-3,4-dihydroquinoline-1(2H)-carbaldehyde (2q)

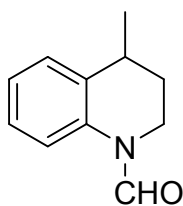

**Reaction Conditions:** 4-methylquinoline (73.8 mg, 0.50 mmol), HCOOH (15.0 equiv.), Co/Melamine-2@C-700 (120 mg), Toluene (1.5 mL), 130 °C, 24 h; **Isolated Yield:** 87.2 mg, 98% (purified as colorless oil by flash column chromatography over silica gel with hexane/ethyl acetate = 3/1); **<sup>1</sup>H NMR (300 MHz, CDCl<sub>3</sub>):** δ (ppm): 8.82 (s, 1H), 7.15-7.33 (m, 4H), 3.76-3.95 (m, 2H), 2.88-3.03 (m, 1H), 2.03-2.15 (m, 1H), 1.65-1.78 (m, 1H), 1.37 (d, *J* = 6.9 Hz, 3H); **<sup>13</sup>C NMR (75 MHz, CDCl<sub>3</sub>):** δ (ppm): 161.1, 136.6, 134.0, 128.1, 127.1, 124.7, 117.2, 38.2, 30.7, 30.0, 20.8; **HR-MS (ESI):** *m/z* calculated for [C<sub>11</sub>H<sub>13</sub>NONa]<sup>+</sup> ([M+Na]<sup>+</sup>): 198.0889, found: 198.0889.

#### 3-methyl-3,4-dihydroquinoline-1(2H)-carbaldehyde (2r)

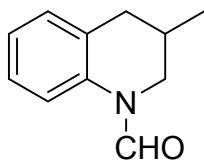

**Reaction Conditions:** 3-methylquinoline (73.0 mg, 0.50 mmol), HCOOH (10.0 equiv.), Co/Melamine-2@C-700 (60 mg), Toluene (1.5 mL), 130 °C, 24 h; **Isolated Yield:** 87.8 mg, 99% (purified as colorless oil by flash column chromatography over silica gel with hexane/ethyl acetate = 4/1); **<sup>1</sup>H NMR (300 MHz, CDCl<sub>3</sub>):** δ (ppm): 8.74 (s, 1H), 6.92-7.18 (m, 4H), 4.10 (ddd, *J* = 12.9, 4.5, 1.5 Hz, 1H), 3.02 (dd, *J* = 12.6, 10.2 Hz, 1H), 2.83 (ddd, *J* = 16.2, 5.1, 1.5 Hz, 1H), 2.40 (dd, *J* = 16.2, 9.9 Hz, 1H), 1.84-2.06 (m, 1H), 1.02 (d, *J* = 6.6 Hz, 3H); **<sup>13</sup>C NMR (75 MHz, CDCl<sub>3</sub>):** δ (ppm): 161.1, 136.9, 129.8, 128.3, 127.0, 124.6, 116.7, 46.4, 35.5, 27.9, 18.7; **HR-MS (ESI):** *m/z* calculated for [C<sub>11</sub>H<sub>13</sub>NONa]<sup>+</sup> ([M+Na]<sup>+</sup>): 198.0889, found: 198.0891.

### 3-oxo-3,4-dihydroquinoline-1(2H)-carbaldehyde (2s)

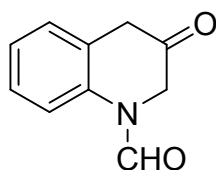

**Reaction Conditions:** quinolin-3-ol (72.0 mg, 0.50 mmol), HCOOH (10.0 equiv.), Co/Melamine-2@C-700 (60 mg), Toluene (1.5 mL), 130 °C, 24 h; **Isolated Yield:** 56.0 mg, 64% (purified as white solid by flash column chromatography using Combi Flash Rf+); **<sup>1</sup>H NMR (300 MHz, CDCl<sub>3</sub>):** δ (ppm): 8.59 (s, 1H), 7.14-7.33 (m, 4H), 4.26 (s, 2H), 3.57 (s, 2H); **<sup>13</sup>C NMR (75 MHz, CDCl<sub>3</sub>):** δ (ppm): 204.1, 160.7, 136.5, 129.3, 128.6, 127.1, 126.4, 120.2, 49.0, 43.9; **HR-MS (ESI):** *m/z* calculated for [C<sub>10</sub>H<sub>9</sub>NO<sub>2</sub>Na]<sup>+</sup> ([M+Na]<sup>+</sup>): 198.0526, found: 198.0529.

### 3-acetyl-3,4-dihydroquinoline-1(2H)-carbaldehyde (2t)

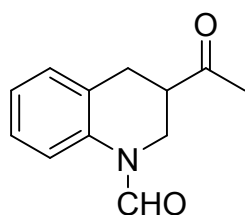

**Reaction Conditions:** 1-(quinolin-3-yl)ethan-1-one (88.2 mg, 0.50 mmol), HCOOH (10.0 equiv.), Co/Melamine-2@C-700 (60 mg), Toluene (1.5 mL), 130 °C, 24 h; **Isolated Yield:** 73.0 mg, 72% (purified as white solid by flash column chromatography over silica gel with hexane/ethyl acetate = 3/1); **<sup>1</sup>H NMR (400 MHz, CDCl<sub>3</sub>):** δ (ppm): 8.79 (s, 1H), 7.13-7.28 (m, 4H), 4.29-4.42 (m, 1H), 3.64-3.73 (m, 1H), 2.99-3.12 (m, 3H), 2.33 (s, 3H); **<sup>13</sup>C NMR (100 MHz, CDCl<sub>3</sub>):** δ (ppm): 207.1, 160.9, 136.5, 129.8, 127.3, 126.5, 125.0, 117.0, 45.9, 40.4, 28.6, 28.5; **HR-MS (ESI):** *m/z* calculated for [C<sub>12</sub>H<sub>13</sub>NO<sub>2</sub>Na]<sup>+</sup> ([M+Na]<sup>+</sup>): 226.0839, found: 226.0839.

### N-(1-formyl-1,2,3,4-tetrahydroquinolin-3-yl)formamide (2u)

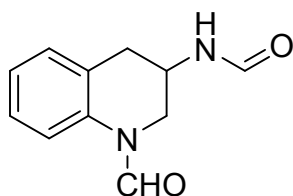



**Reaction Conditions:** quinolin-3-amine (73.5 mg, 0.50 mmol), HCOOH (10.0 equiv.), Co/Melamine-2@C-700 (60 mg), Toluene (1.5 mL), 130 °C, 24 h; **Isolated Yield:** 68.0 mg, 66% (purified as white solid by flash column chromatography over silica gel with ethyl acetate); **<sup>1</sup>H NMR (300 MHz, CDCl<sub>3</sub>) (major conformer):** δ (ppm): 8.66 (s, 1H), 7.97 (s, 1H), 7.04-7.16 (m, 4H), 6.53 (d, *J* = 8.1 Hz, 1H), 4.35-4.46 (m, 1H), 3.91 (dd, *J* = 13.2, 6.0 Hz, 1H), 3.61 (dd, *J* = 13.2, 3.9 Hz, 1H), 3.05 (dd, *J* = 16.8, 5.1 Hz, 1H), 2.77 (dd, *J* = 16.8, 5.7 Hz, 1H); **<sup>13</sup>C NMR (75 MHz, CDCl<sub>3</sub>) (major conformer):** δ (ppm): 161.3, 161.0, 136.2, 130.4, 127.6, 125.1, 116.7, 43.4, 41.5, 32.8; **HR-MS (ESI):** *m/z* calculated for [C<sub>11</sub>H<sub>12</sub>N<sub>2</sub>O<sub>2</sub>Na]<sup>+</sup> ([M+Na]<sup>+</sup>): 227.0791, found: 227.0793.

### 2-Phenyl-3,4-dihydroquinoline-1(2H)-carbaldehyde (2v)

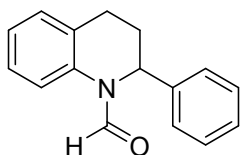

**Reaction Conditions:** 2-phenylquinoline (102.6 mg, 0.50 mmol), HCOOH (15.0 equiv.), CoOx-Melamine@C-700 (60 mg), Toluene (1.5 mL), 130 °C, 40 h; **Isolated Yield:** 114 mg, 0.48 mmol, 96% (purified as colorless oil by flash column chromatography over silica gel with heptane/ethyl acetate = 4/1); **<sup>1</sup>H NMR (300 MHz, CDCl<sub>3</sub>) (major conformer):** δ (ppm): 8.84 (s, 1H), 7.11 - 7.28 (m, 9H), 5.75 (t, *J* = 6.2 Hz, 1H), 2.64 - 2.69 (m, 2H), 2.30 - 2.41 (m, 1H), 2.06 - 2.16 (m, 1H); **<sup>13</sup>C NMR (75 MHz, CDCl<sub>3</sub>) (major conformer):** δ (ppm): 161.5, 141.0, 137.1, 130.1, 129.1, 128.4, 127.4, 126.9, 125.8, 124.7, 117.8, 53.3, 30.0, 24.6; **HR-MS (ESI):** *m/z* calculated for [C<sub>16</sub>H<sub>15</sub>NONa]<sup>+</sup> ([M+Na]<sup>+</sup>): 260.1046, found: 260.1045.

### 2-(but-3-en-1-yl)-3,4-dihydroquinoline-1(2H)-carbaldehyde (2w)

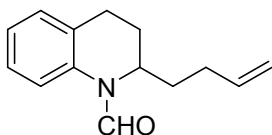

**Reaction Conditions:** 2-(but-3-en-1-yl)quinoline (85.0 mg, 0.465mmol), HCOOH (10.0 equiv.), Co/Melamine-2@C-700 (60 mg), Toluene (1.5 mL), 130 °C, 24 h; **Isolated Yield:** 68.2 mg, 68% (purified as colorless oil by flash column chromatography over silica gel with hexane/ethyl acetate = 3/1); **<sup>1</sup>H NMR (400 MHz, CDCl<sub>3</sub>) (major conformer):** δ (ppm): 8.68 (s, 1H), 7.09-7.21 (m, 4H), 5.68-5.86 (m, 1H), 4.90-5.04 (m, 2H), 4.75-4.83 (m, 1H), 2.71-2.85 (m, 2H), 2.00-2.12 (m, 3H), 1.80-1.86 (m, 1H), 1.64-1.72 (m, 1H), 1.45-1.54 (m, 1H); **<sup>13</sup>C NMR (100 MHz, CDCl<sub>3</sub>) (major**

**conformer):**  $\delta$  (ppm): 161.4, 137.7, 136.2, 129.4, 129.1, 127.1, 124.9, 118.6, 114.9, 47.9, 30.6, 30.1, 26.5, 23.6; **HR-MS (EI):**  $m/z$  calculated for  $[C_{14}H_{17}NO]^+$  ( $[M]^+$ ): 215.13047, found: 215.13037.

### phenanthridine-5(6H)-carbaldehyde (5)

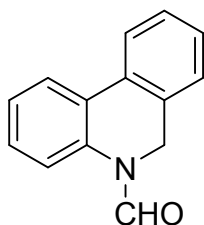

**Reaction Conditions:** phenanthridine (91.4 mg, 0.50 mmol), HCOOH (20.0 equiv.), Co/Melamine-2@C-700 (80 mg), Toluene (1.5 mL), 130 °C, 24 h; **Isolated Yield:** 100.0 mg, 95% (purified as white solid by flash column chromatography over silica gel with hexane/ethyl acetate = 3/1); **<sup>1</sup>H NMR (300 MHz, CDCl<sub>3</sub>) (major conformer):**  $\delta$  (ppm): 8.50 (s, 1H), 7.68-7.82 (m, 2H), 7.11-7.32 (m, 6H), 4.84 (s, 2H); **<sup>13</sup>C NMR (75 MHz, CDCl<sub>3</sub>) (major conformer):**  $\delta$  (ppm): 160.6, 136.2, 132.7, 130.7, 128.8, 128.3, 128.2, 127.8, 126.4, 126.3, 124.4, 123.3, 119.2, 42.1; **HR-MS (ESI):**  $m/z$  calculated for  $[C_{14}H_{11}NONa]^+$  ( $[M+Na]^+$ ): 232.0733, found: 232.0733.

### 3,4-dihydrobenzo[h]quinoline-1(2H)-carbaldehyde (7)

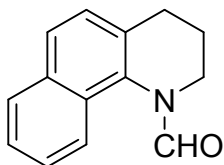

**Reaction Conditions:** benzo[h]quinoline (90.5 mg, 0.50 mmol), HCOOH (20.0 equiv.), Co/Melamine-2@C-700 (60 mg), Toluene (1.5 mL), 130 °C, 24 h; **Isolated Yield:** 94.0 mg, 89% (purified as white solid by flash column chromatography over silica gel with hexane/ethyl acetate = 3/1); **<sup>1</sup>H NMR (300 MHz, CDCl<sub>3</sub>) (major conformer):**  $\delta$  (ppm): 8.65 (s, 1H), 7.94 (dd,  $J = 7.8, 1.5$  Hz, 1H), 7.85 (dd,  $J = 7.5, 1.8$  Hz, 1H), 7.67 (d,  $J = 8.1$  Hz, 1H), 7.43-7.54 (m, 2H), 7.29 (d,  $J = 8.4$  Hz, 1H), 3.94 (brs, 2H), 2.92 (t,  $J = 6.6$  Hz, 2H), 2.07 (quintet,  $J = 6.6$  Hz, 2H); **<sup>13</sup>C NMR (75 MHz, CDCl<sub>3</sub>) (major conformer):**  $\delta$  (ppm): 164.3, 133.4, 133.0, 129.4, 128.4, 127.4, 126.8, 126.6, 125.7, 125.5, 122.0, 40.4, 27.0, 23.6; **HR-MS (ESI):**  $m/z$  calculated for  $[C_{14}H_{13}NONa]^+$  ( $[M+Na]^+$ ): 234.0889, found: 234.0890.

### Phthalazine-2(1H)-carbaldehyde (9)

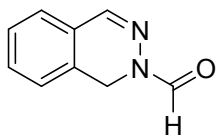

**Reaction Conditions:** phthalazine (65.1 mg, 0.50 mmol), HCOOH (15.0 equiv.), Co/Melamine-2@C-700 (60 mg), Toluene (1.5 mL), 130 °C, 27 h; **Isolated Yield:** 65 mg, 0.41 mmol, 81% (purified as white semisolid by flash column chromatography over silica gel with heptane/ethyl acetate = 4/1); **<sup>1</sup>H NMR (300 MHz, CDCl<sub>3</sub>):** δ (ppm): 8.66 (s, 1H), 7.48 (s, 1H), 7.39 (td, *J* = 7.5, 1.5 Hz, 1H), 7.27 - 7.33 (m, 1H), 7.20 (dd, *J* = 7.5, 1.2 Hz, 1H), 7.09 - 7.13 (m, 1H), 4.87 (s, 2H); **<sup>13</sup>C NMR (75 MHz, CDCl<sub>3</sub>):** δ (ppm): 164.7, 143.0, 132.0, 128.9, 128.4, 126.4, 126.1, 124.1, 41.0; **HR-MS (ESI):** *m/z* calculated for [C<sub>9</sub>H<sub>8</sub>N<sub>2</sub>ONa]<sup>+</sup> ([M+Na]<sup>+</sup>): 183.0529, found: 183.0527.

### 3,4-Dihydro-1,5-naphthyridine-1(2H)-carbaldehyde (11)

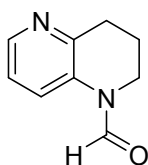

**Reaction Conditions:** 1,5-naphthyridine (67.0 mg, 0.50 mmol), HCOOH (10.0 equiv.), NEt<sub>3</sub> (2.5 equiv.), Co/Melamine-2@C-700 (60 mg), Toluene (1.5 mL), 130 °C, 24 h; **Isolated Yield:** 31 mg, 0.19 mmol, 38% (purified as colorless liquid by flash column chromatography over silica gel with dichloromethane/methanol = 97/3); **<sup>1</sup>H NMR (400 MHz, CDCl<sub>3</sub>) (major conformer):** δ (ppm): 8.74 (s, 1H), 8.29 - 8.32 (m, 1H), 7.47 (dd, *J* = 8.2, 1.3 Hz, 1H), 7.12 - 7.15 (m, 1H), 3.79 - 3.82 (m, 2H), 3.01 (t, *J* = 6.6 Hz, 2H), 2.02 (quin, *J* = 6.4 Hz, 2H); **<sup>13</sup>C NMR (101 MHz, CDCl<sub>3</sub>) (major and minor conformer):** δ (ppm): 161.9, 160.6, 149.1, 147.4, 145.2, 144.1, 133.9, 132.2, 130.1, 123.8, 122.1, 121.8, 45.8, 40.1, 30.4, 30.0, 22.3, 21.6; **HR-MS (ESI):** *m/z* calculated for [C<sub>9</sub>H<sub>11</sub>N<sub>2</sub>O]<sup>+</sup> ([M+H]<sup>+</sup>): 163.0866, found: 163.0868.

# 10. <sup>1</sup>H NMR, <sup>13</sup>C NMR and <sup>19</sup>F NMR Spectra of Substrate and Products

## Substrate

### 1w

170106.402.10.fid  
Sahoo BS-377-UP  
Au1H CDCl<sub>3</sub> /opt/topspin 1701 2

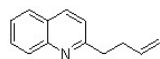

8.07 8.05 7.78 7.76 7.76 7.68 7.68 7.48 7.30 7.28 5.96 5.95 5.94 5.94 5.92 5.91 5.90 5.89 5.88 5.87 5.86 5.85 5.10 5.09 5.07 5.06 5.06 5.01 5.01 5.00 5.00 4.98 4.98 4.98 3.10 3.08 3.08 3.08 3.07 3.06 2.62 2.62 2.61 2.61 2.60 2.60 2.59 2.59 2.58 2.58 2.57 2.57 2.56

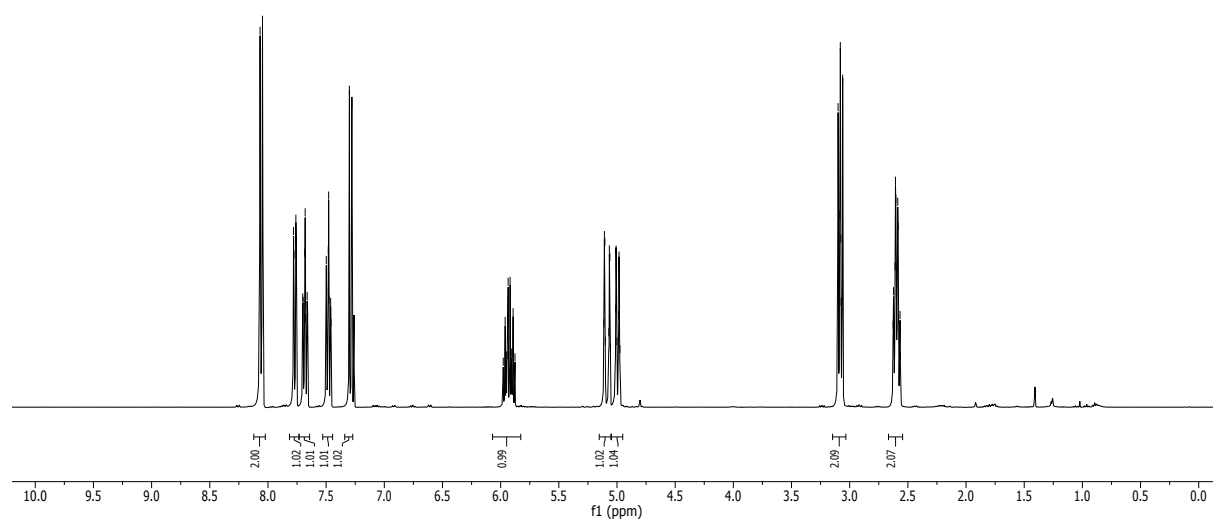

162.09 147.99 137.79 136.36 129.50 128.92 126.87 125.87 121.52 115.36 38.62 33.91

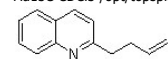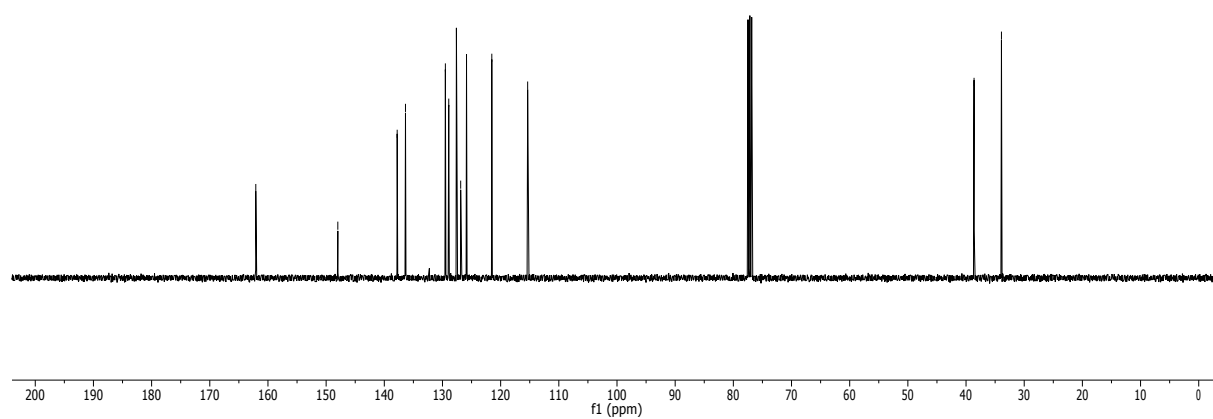

# Products

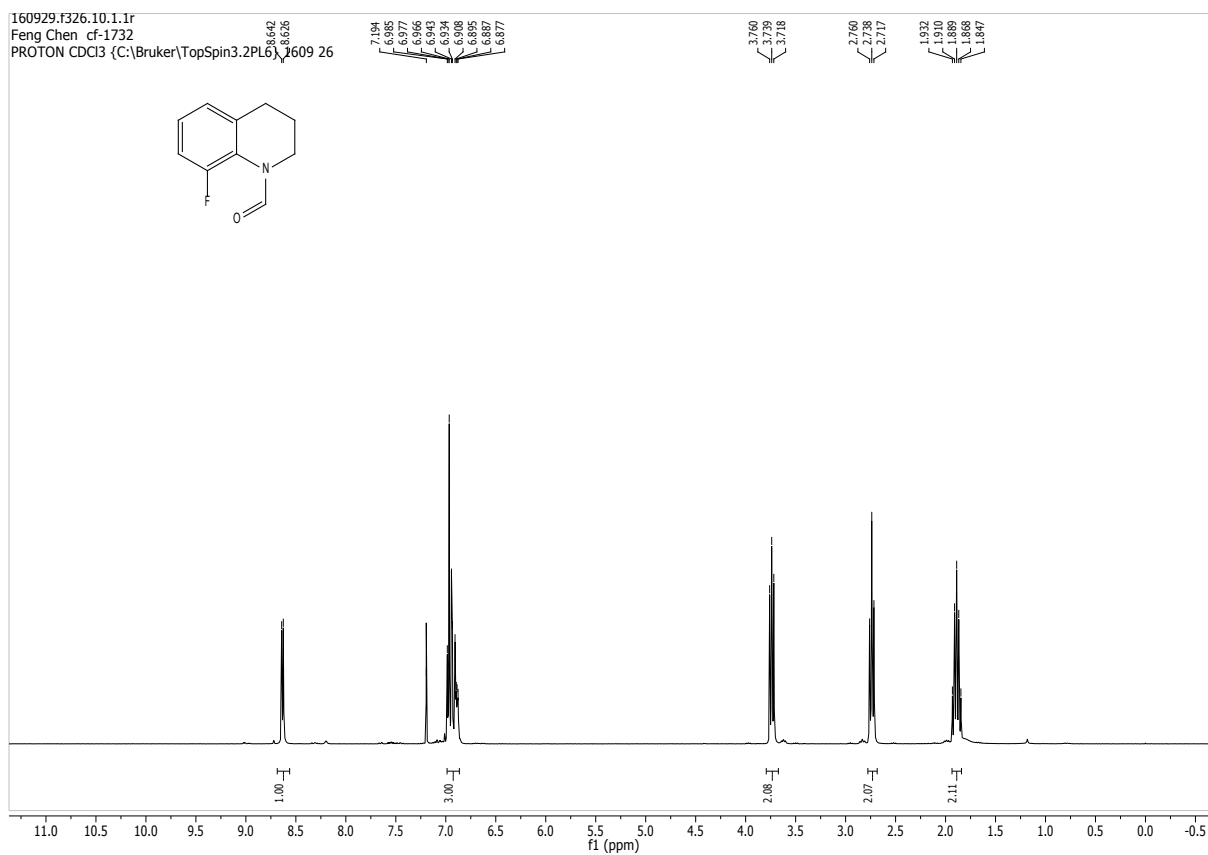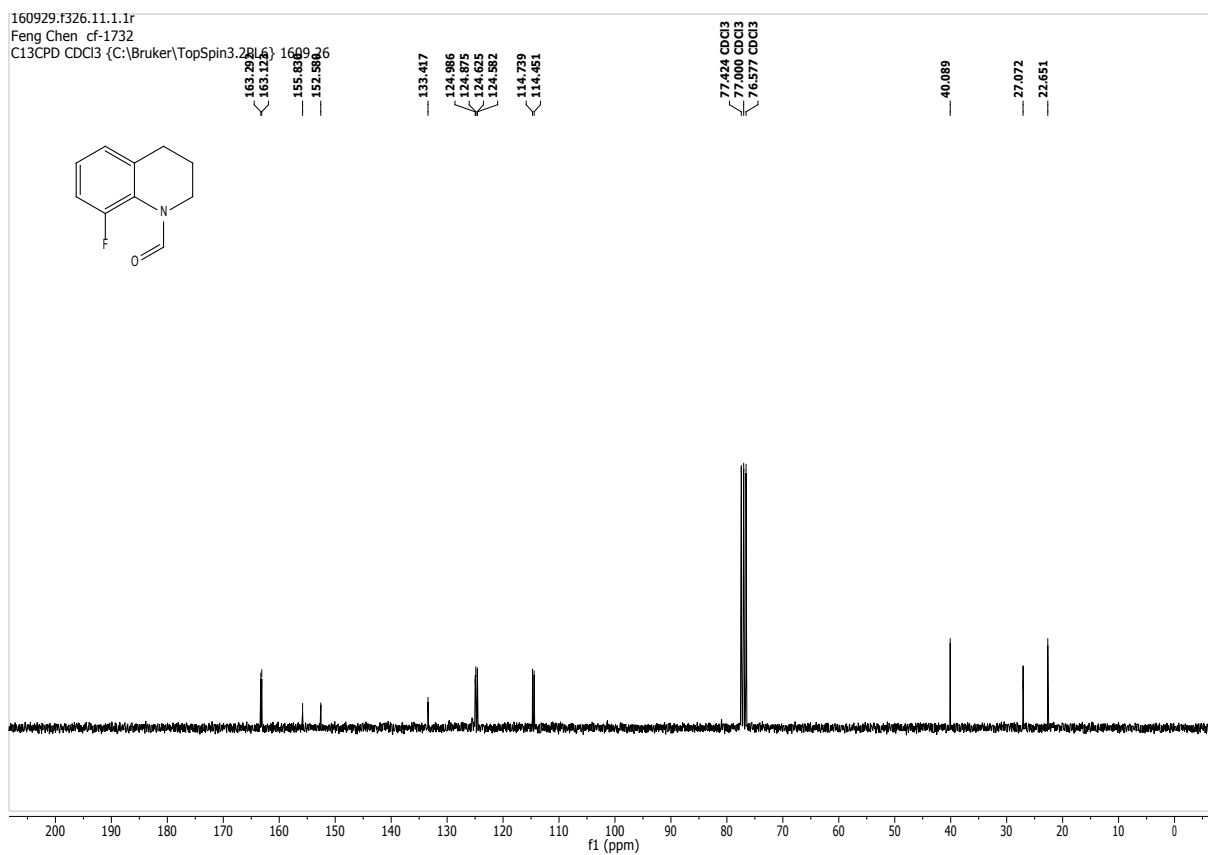

160930.309.10.1.1r  
Feng Chen cf-1750  
Au1H CDCl3 /opt/topspin 1609 9

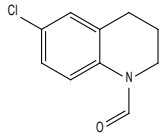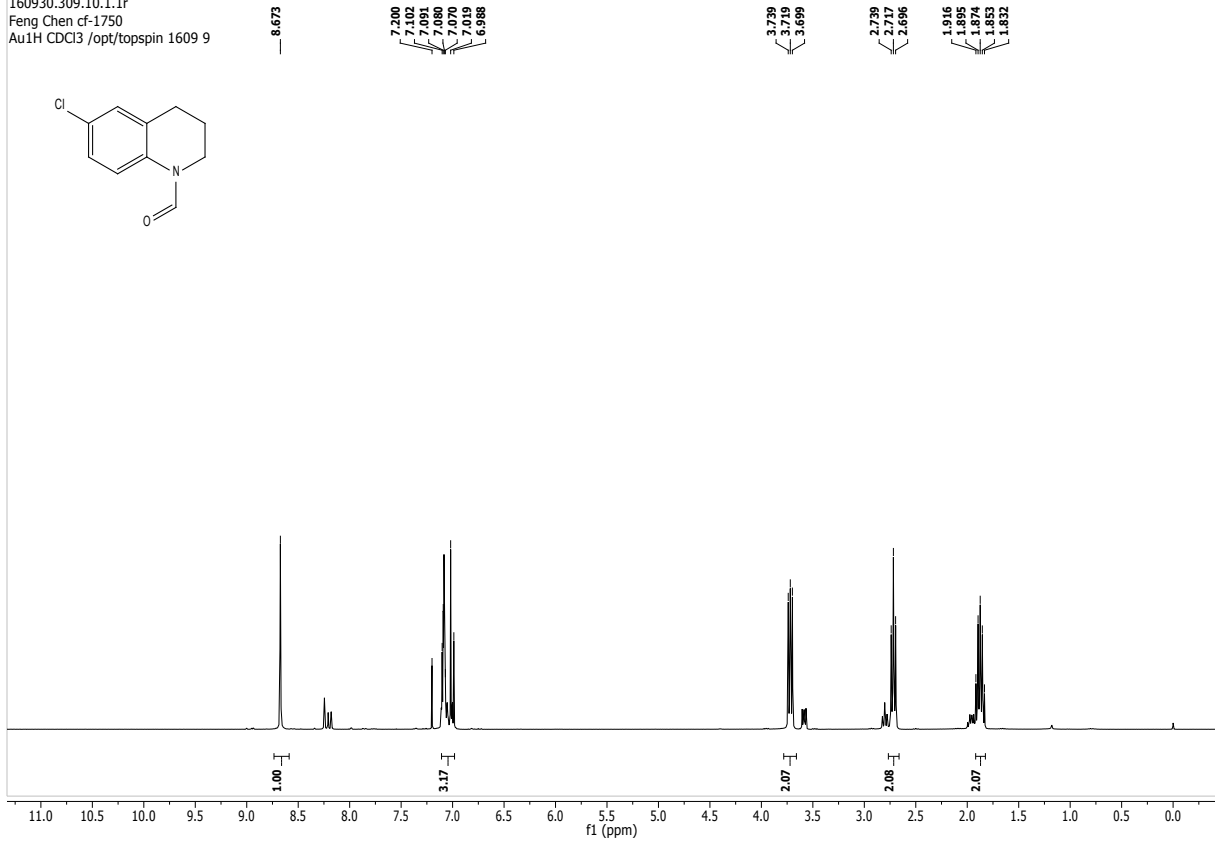

160930.309.11.1.1r  
Feng Chen cf-1750  
Au13C CDCl3 /opt/topspin 1609 9

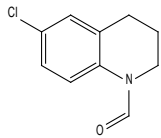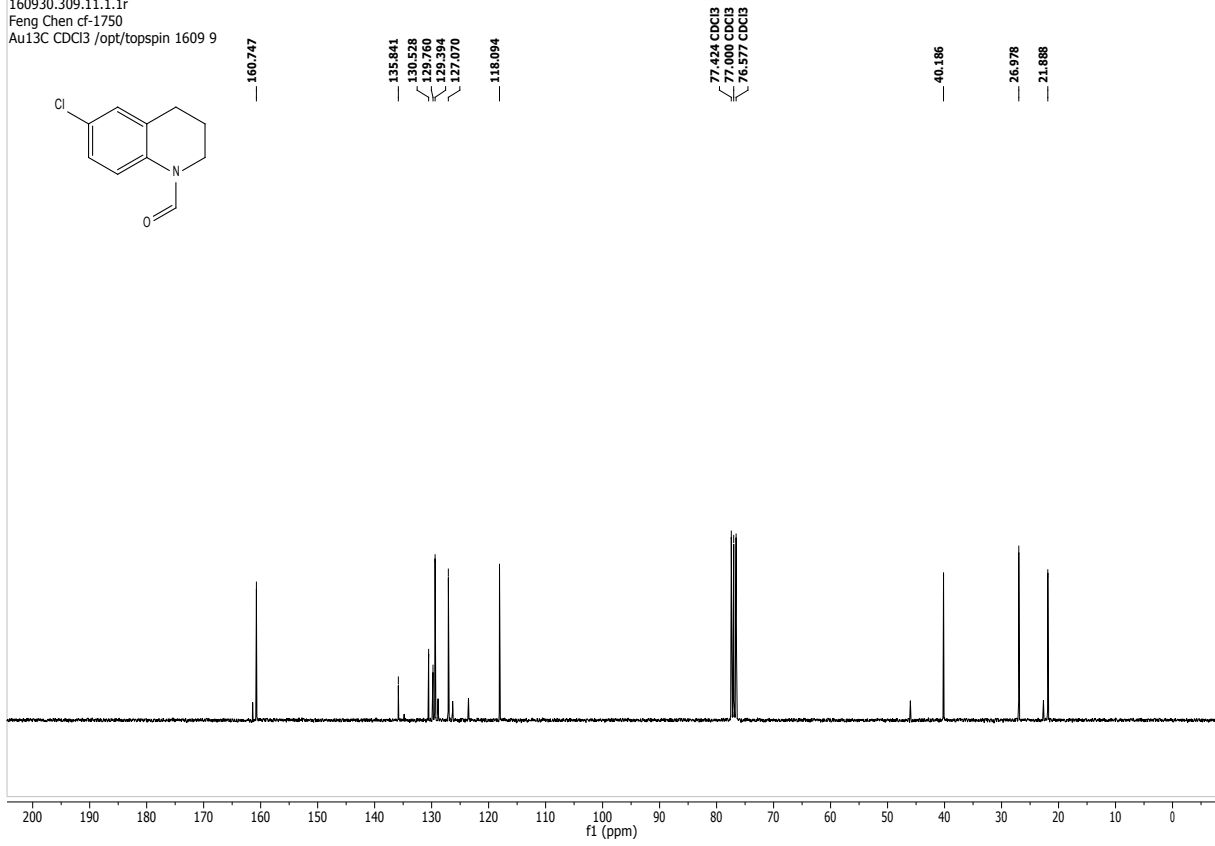

170123.327.10.1.1r  
Feng Chen / cf-1801-5  
Au1H CDCl3 /opt/topspin 1701 27

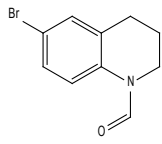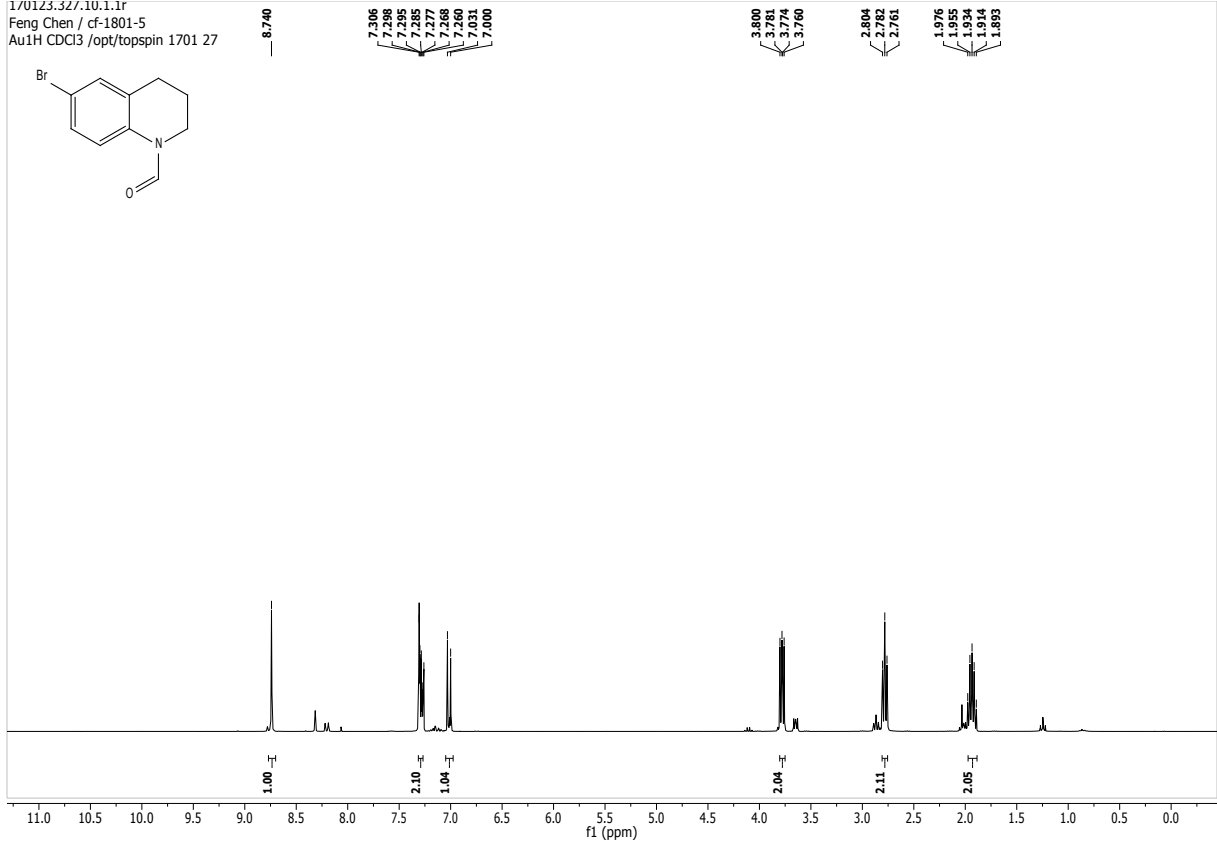

170123.327.11.1.1r  
Feng Chen / cf-1801-5  
Au13C CDCl3 /opt/topspin 1701 27

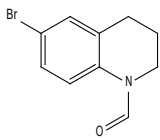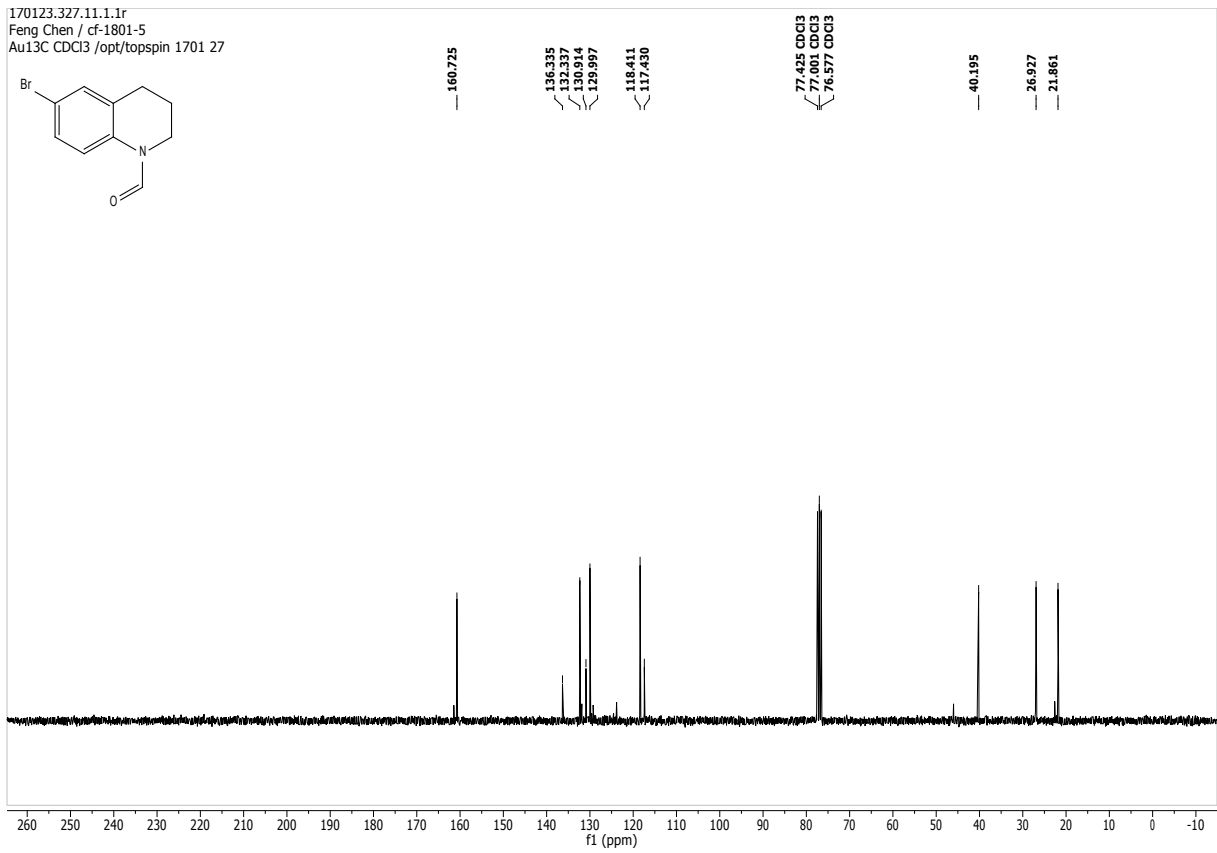

160930.f330.10.fid  
 Sahoo BS-344-PA  
 PROTON CDCl3 {C:\Bruker\TopSpin3.2\PL6} 1609 30

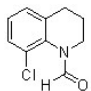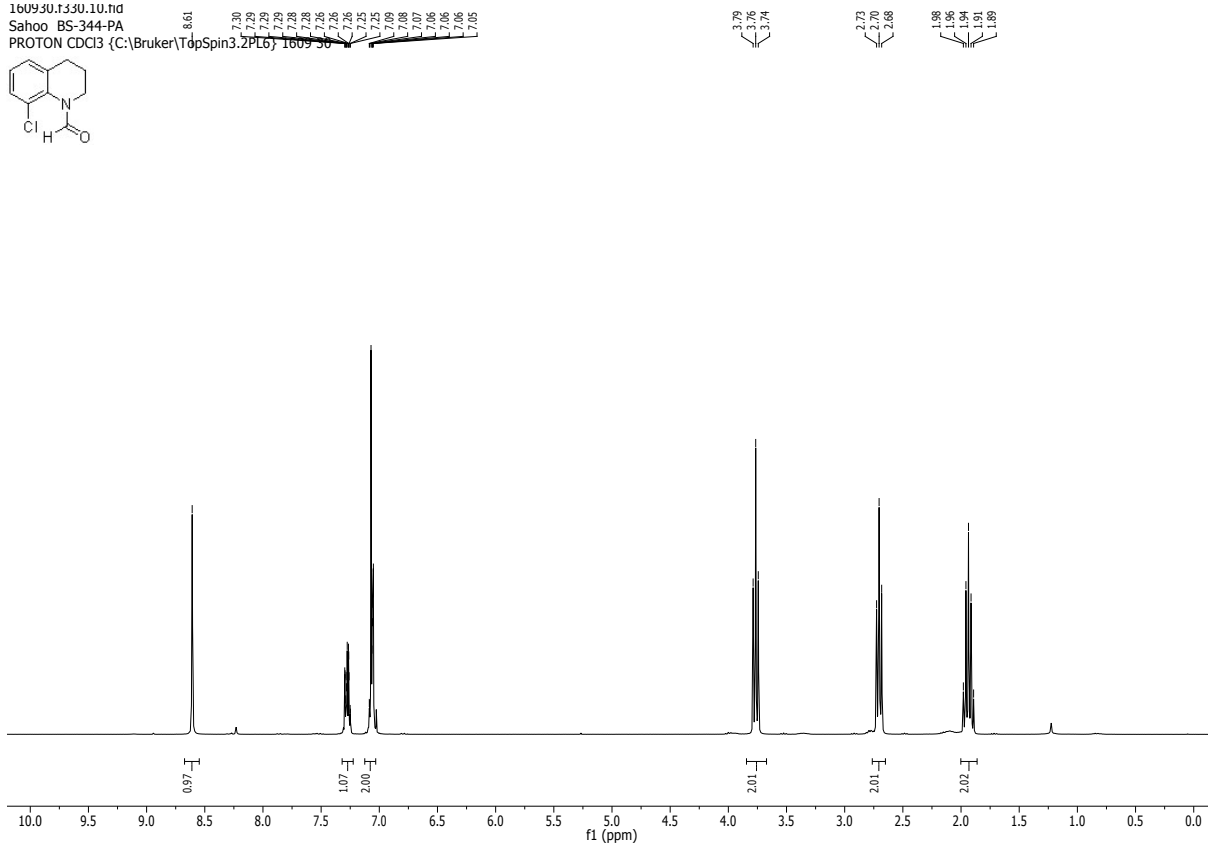

160930.f330.11.fid  
 Sahoo BS-344-PA  
 C13CPD CDCl3 {C:\Bruker\TopSpin3.2\PL6} 1609 30

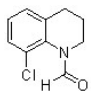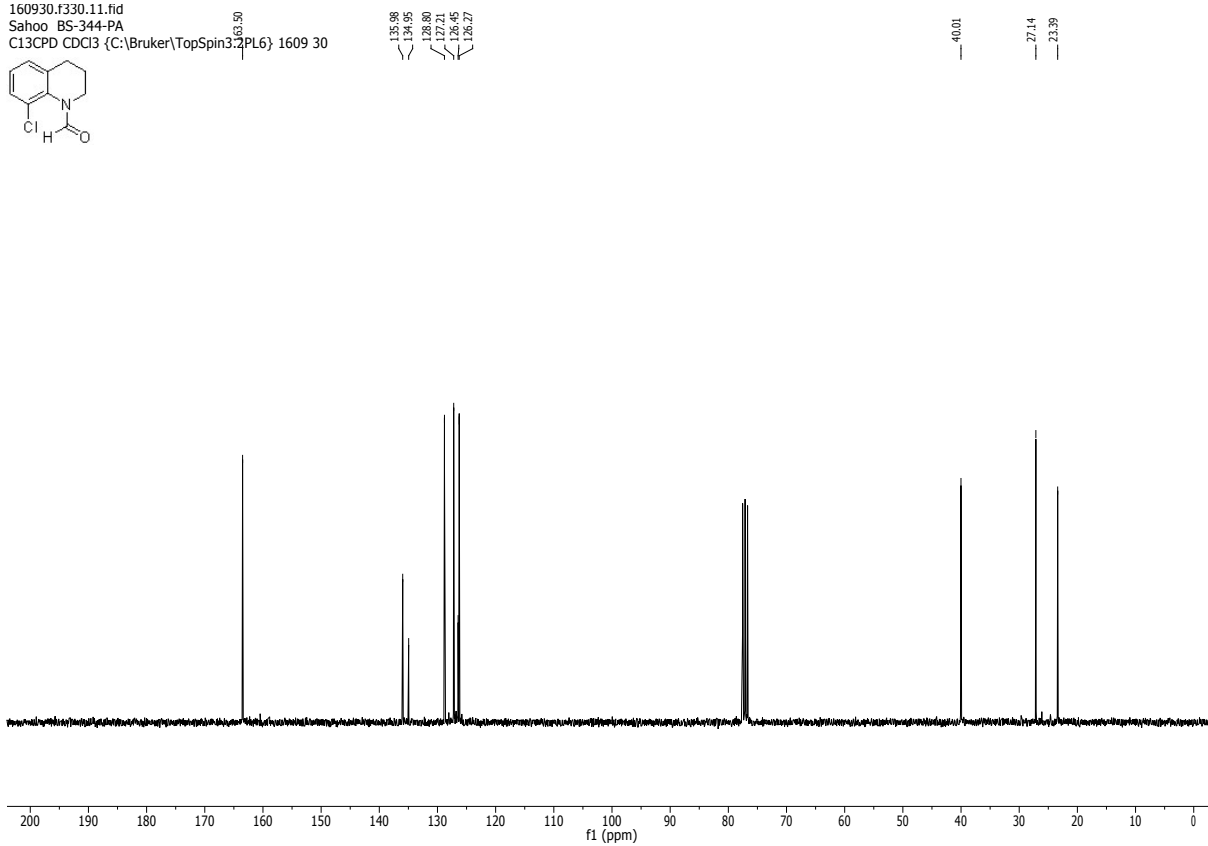



160930.f329.10.nd  
Sahoo BS-344-BP  
PROTON CDCl3 {C:\Bruker\TopSpin3.2PL6} 1609 29

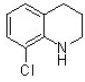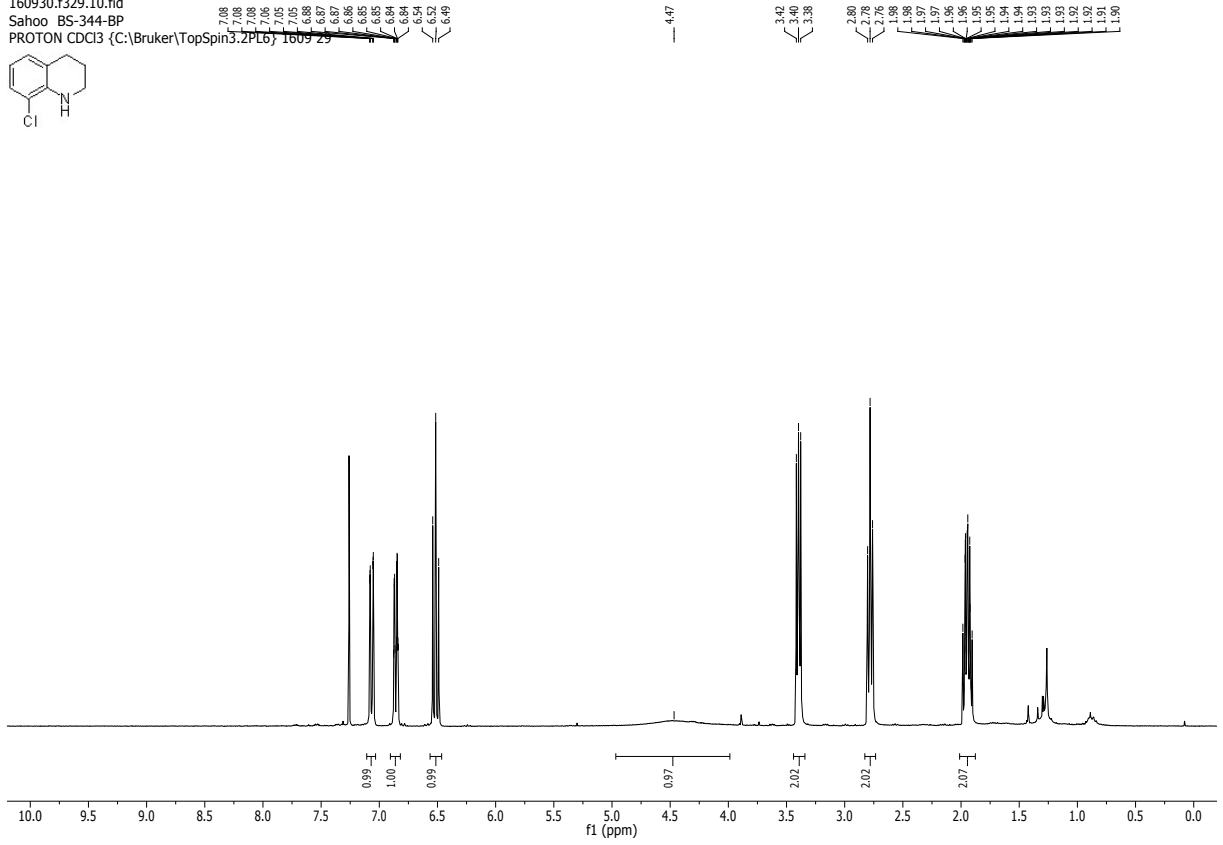

160930.f329.11.fid  
Sahoo BS-344-BP  
C13CPD CDCl3 {C:\Bruker\TopSpin3.2PL6} 1609 29

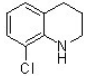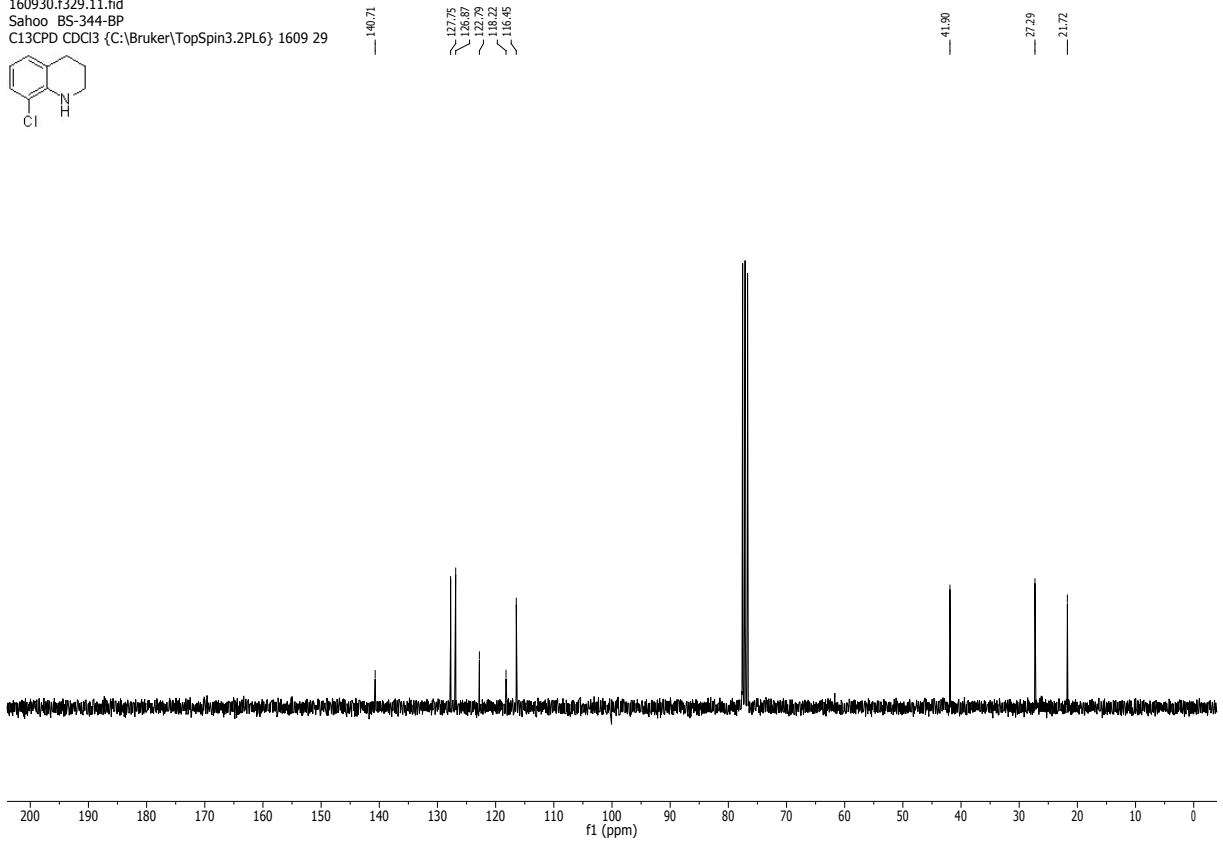

161013.308.10.1.1r  
Chen/ cf-1769-2  
Au1H CDCl3 /opt/topspin 1610 8

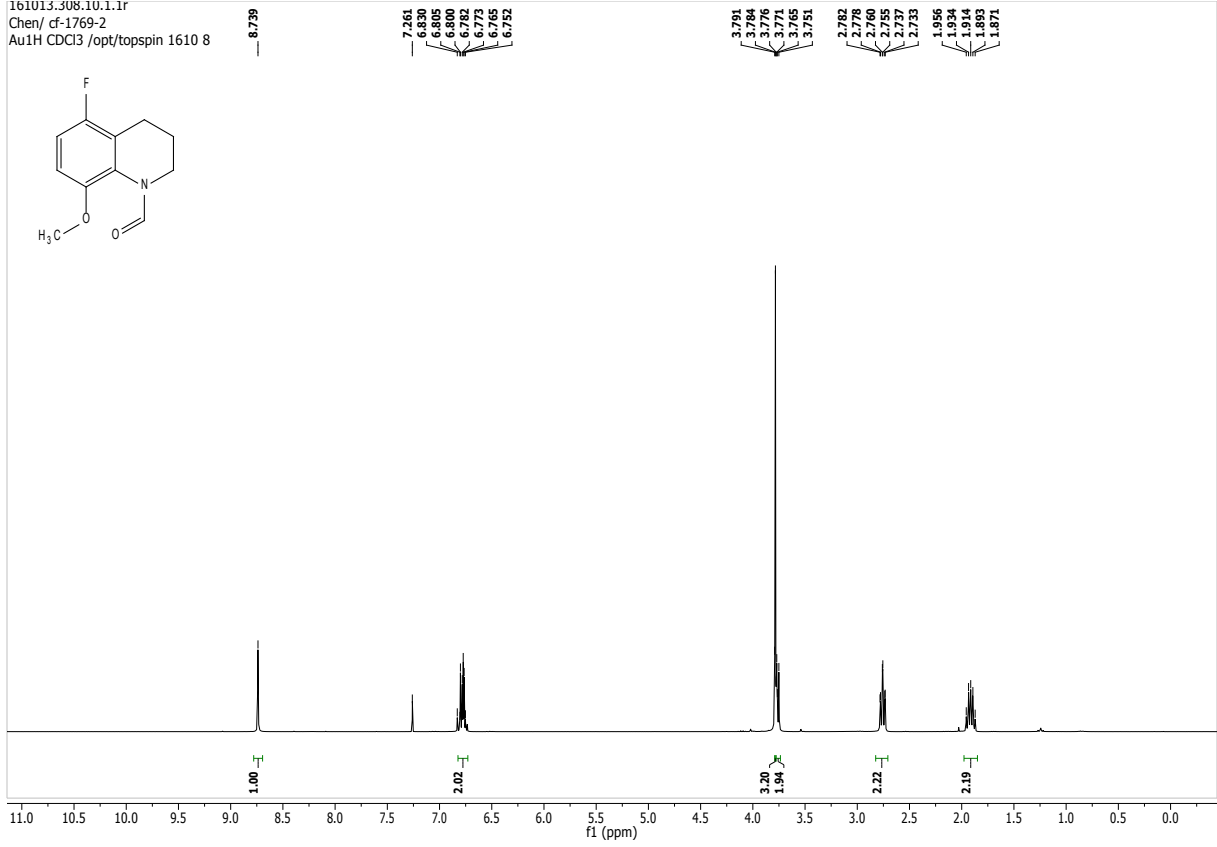

161013.308.11.1.1r  
Chen/ cf-1769-2  
Au13C CDCl3 /opt/topspin 1610 8

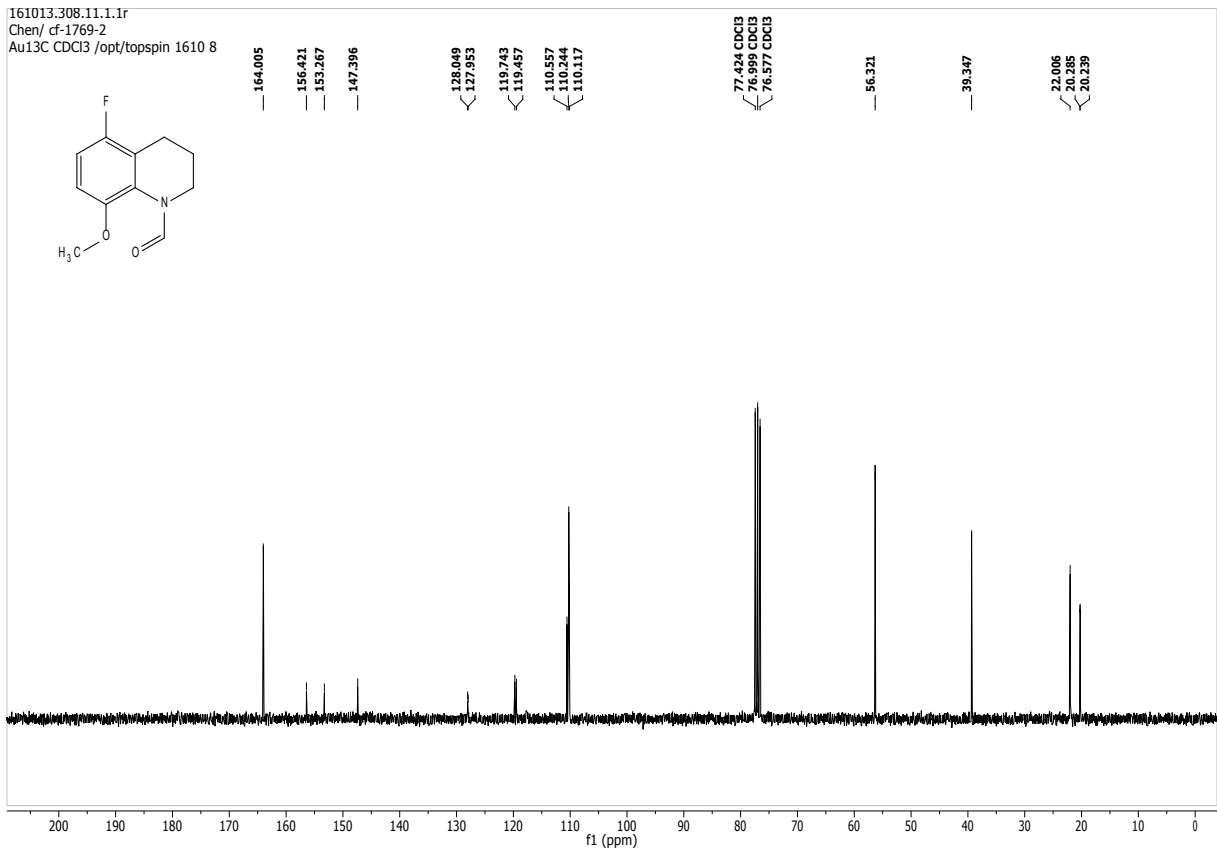

161013.308.12.1.1r  
Chen/ cf-1769-2  
Au19F CDCl3 /opt/topspin 1610 8

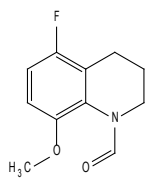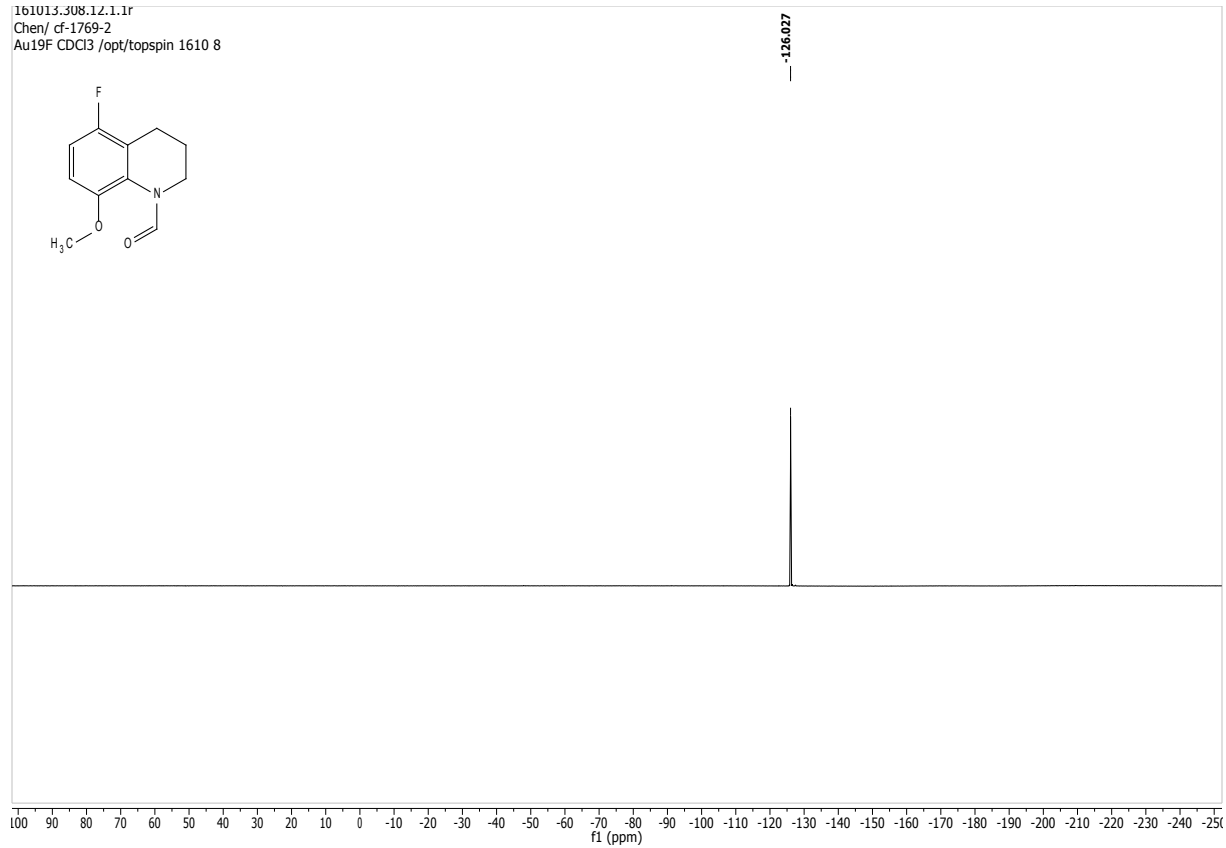

161012.340.11.1.1r  
Chen/ cf-1766  
Au1H CDCl3 /opt/topspin 1610 40

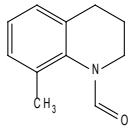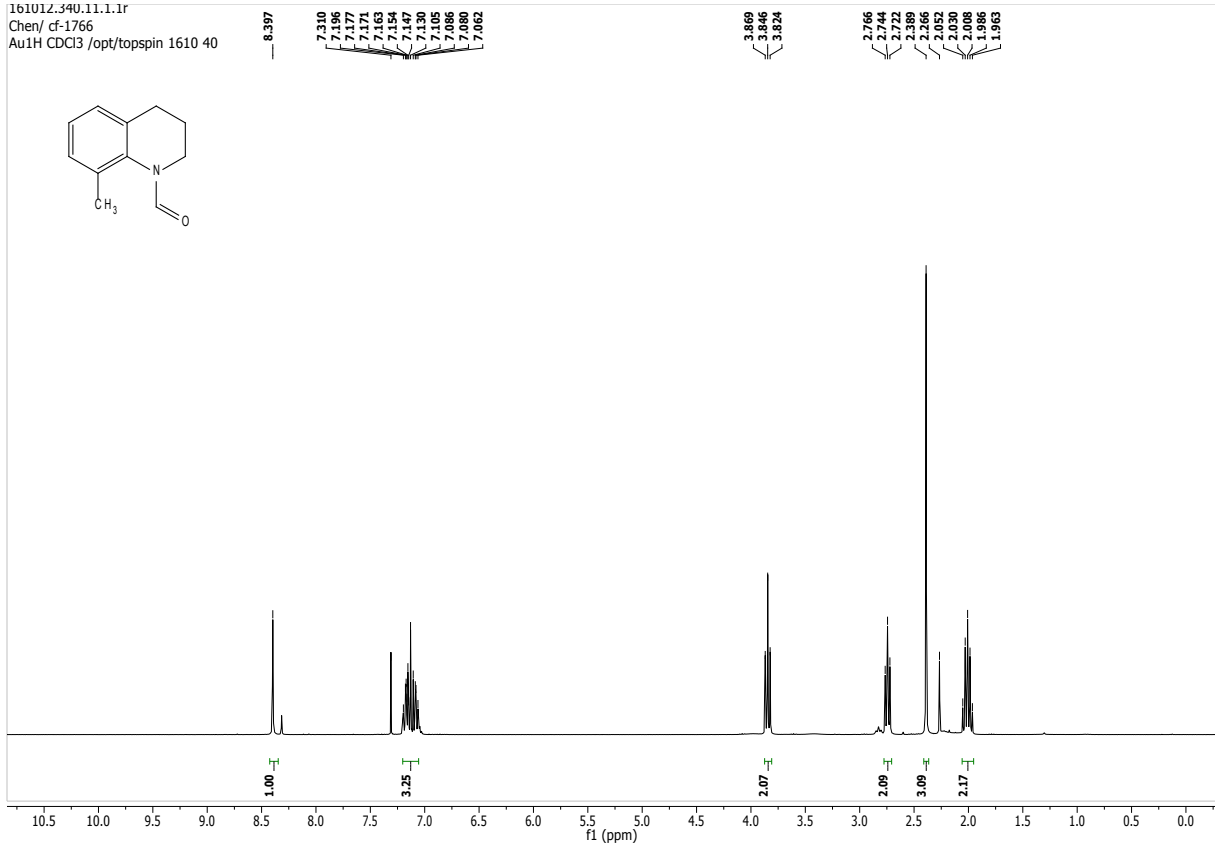

161012.340.10.1.1r  
Chen/ cf-1766  
Au13C CDCl3 /opt/topspin 1610 40

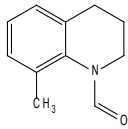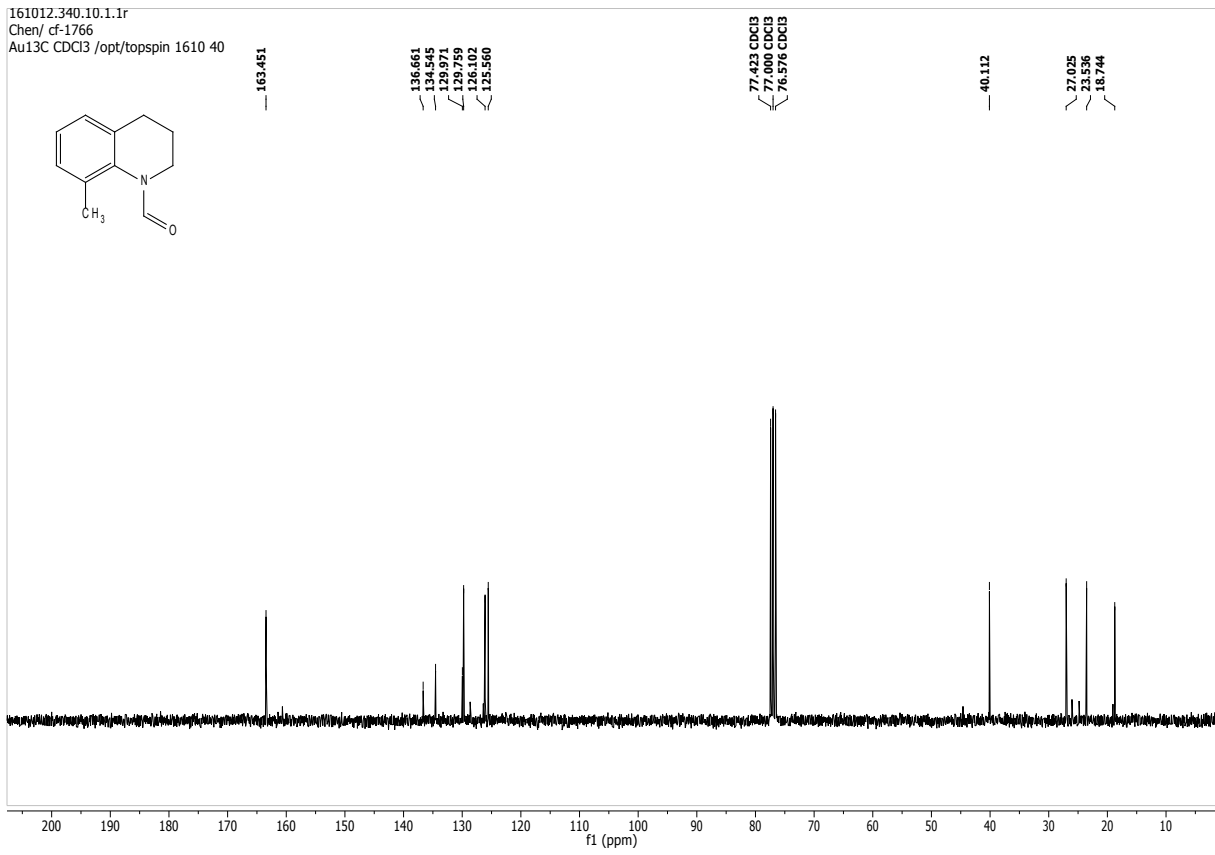

161012.339.10.1.1r  
Chen/ cf-1765  
Au1H CDCl3 /opt/topspin 1610 39

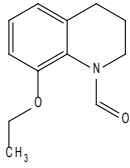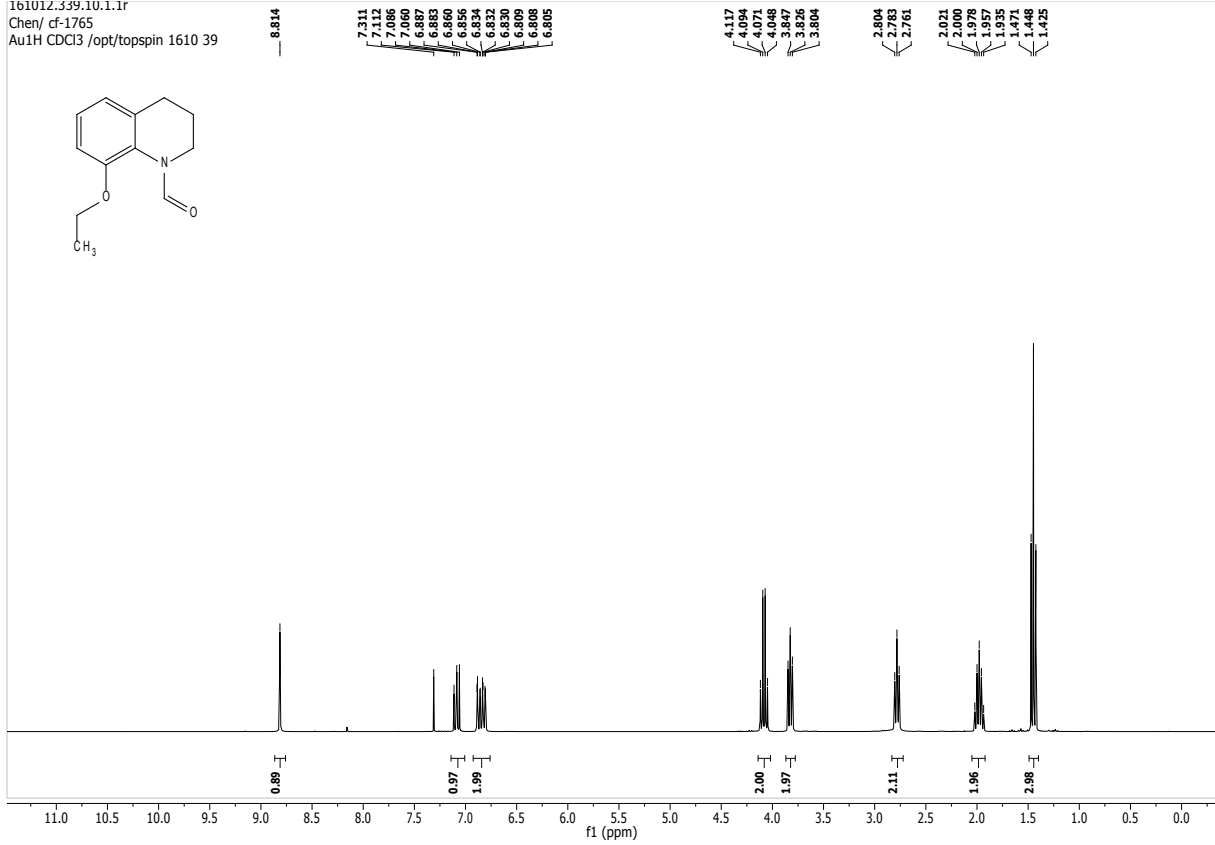

161012.339.11.1.1r  
Chen/ cf-1765  
Au13C CDCl3 /opt/topspin 1610 39

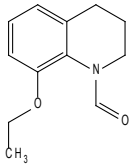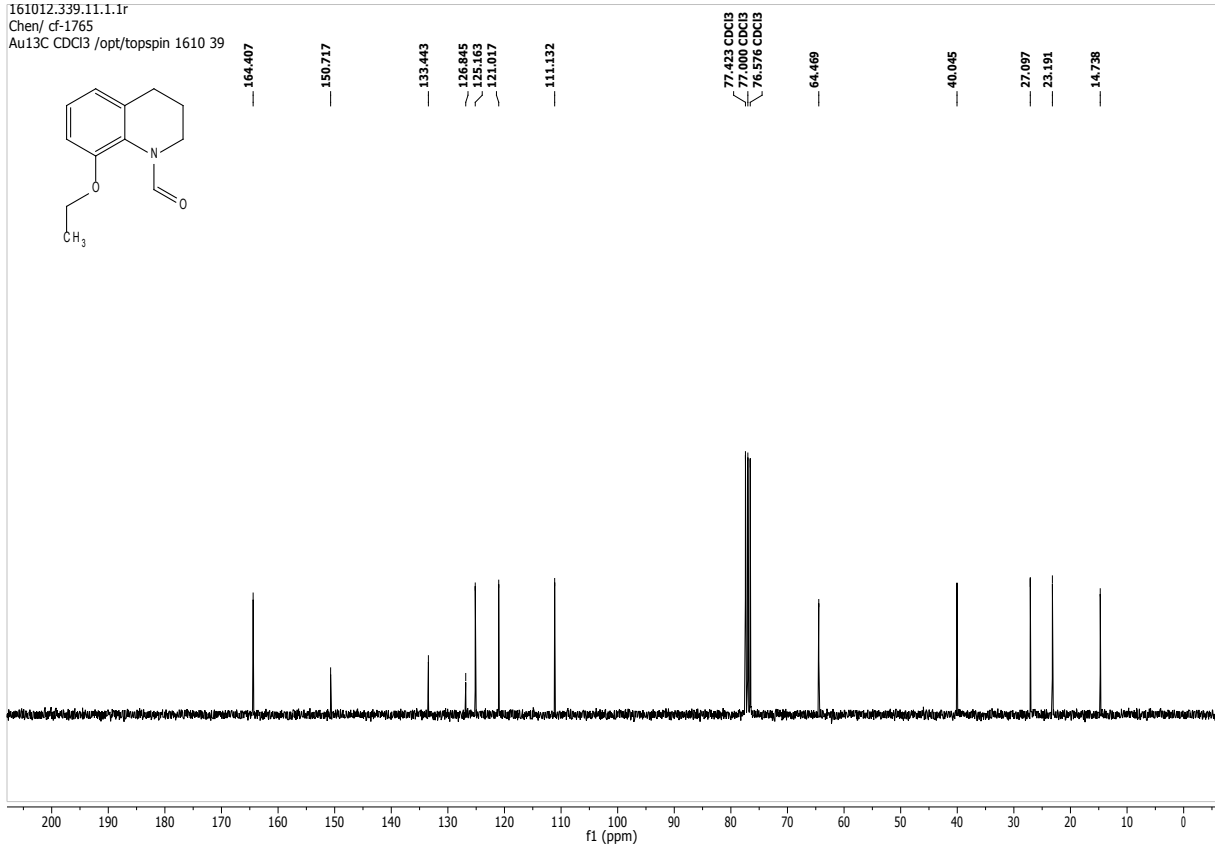

160926.f344.10.fid  
Sahoo BS-338  
PROTON DMSO {C:\Bruker\TopSpin3.2PL6} 1609 44

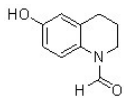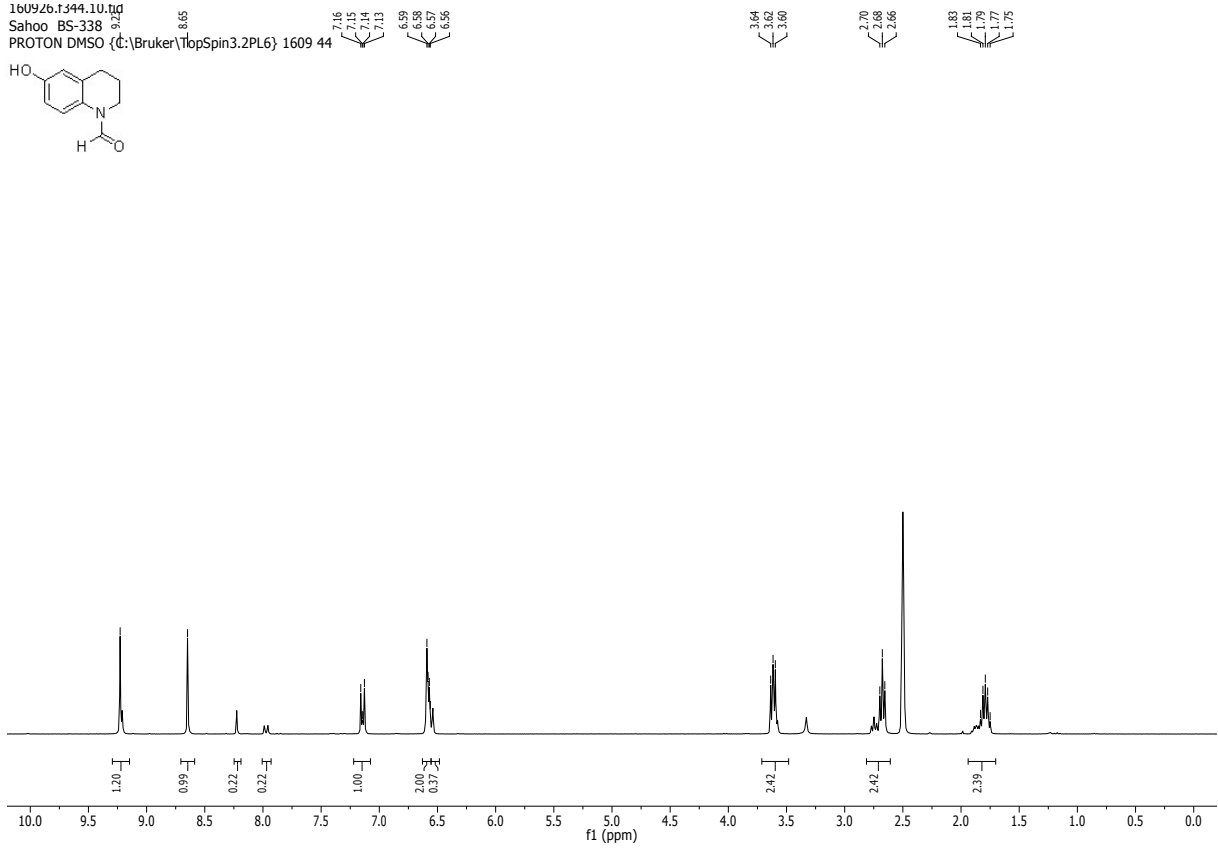

160927.f331.10.fid  
Sahoo BS-338R  
C13CPD DMSO {C:\Bruker\TopSpin3.2PL6} 1609 31

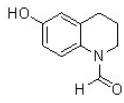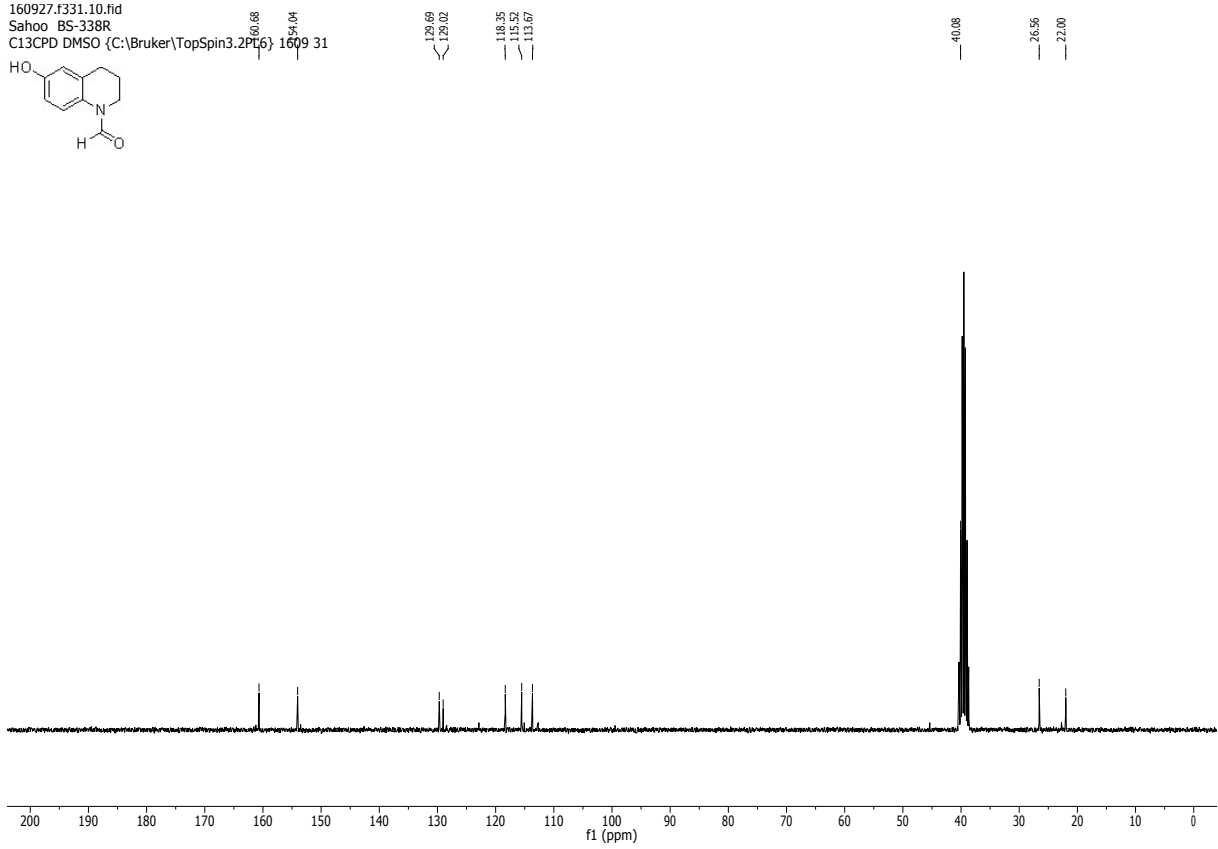

160930.f331.10.nd  
Sahoo BS-346  
PROTON DMSO {C:\Bruker\TopSpin3.2\PL6} 1609 31

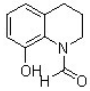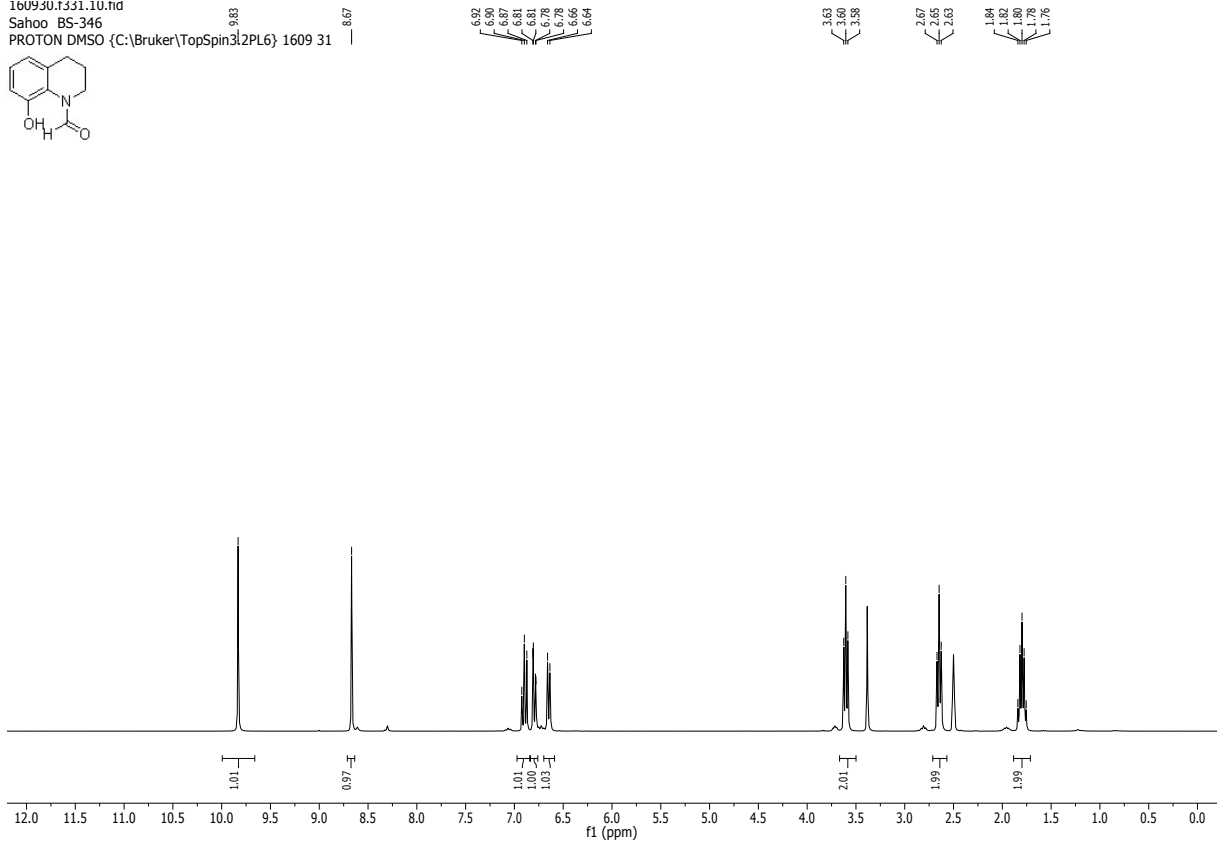

160930.f331.11.fid  
Sahoo BS-346  
C13CPD DMSO {C:\Bruker\TopSpin3.2\PL6} 1609 31

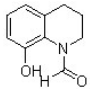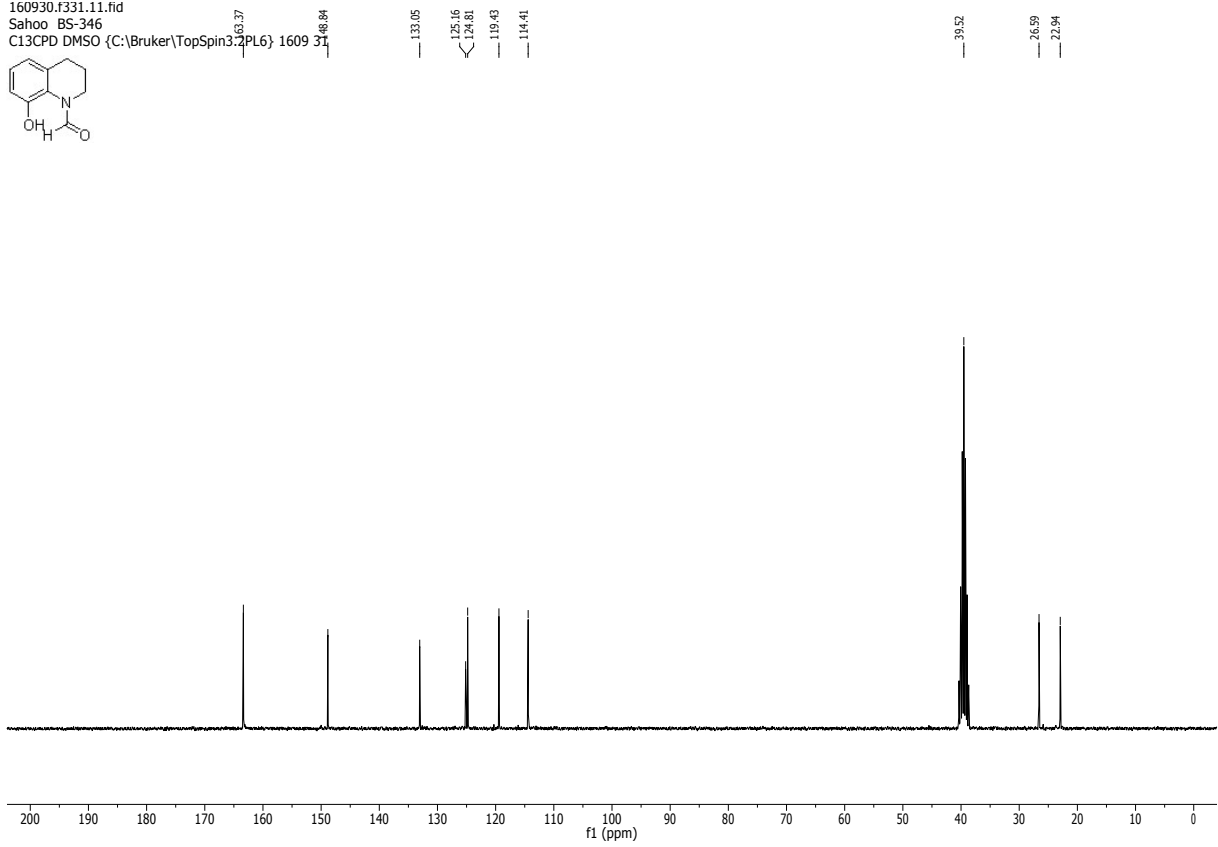

160926.f343.10.fid  
 Sahoo BS-339  
 PROTON CDCl3 {C:\Bruker\TopSpin3.2PL6} 1609 43

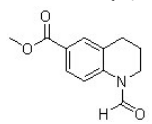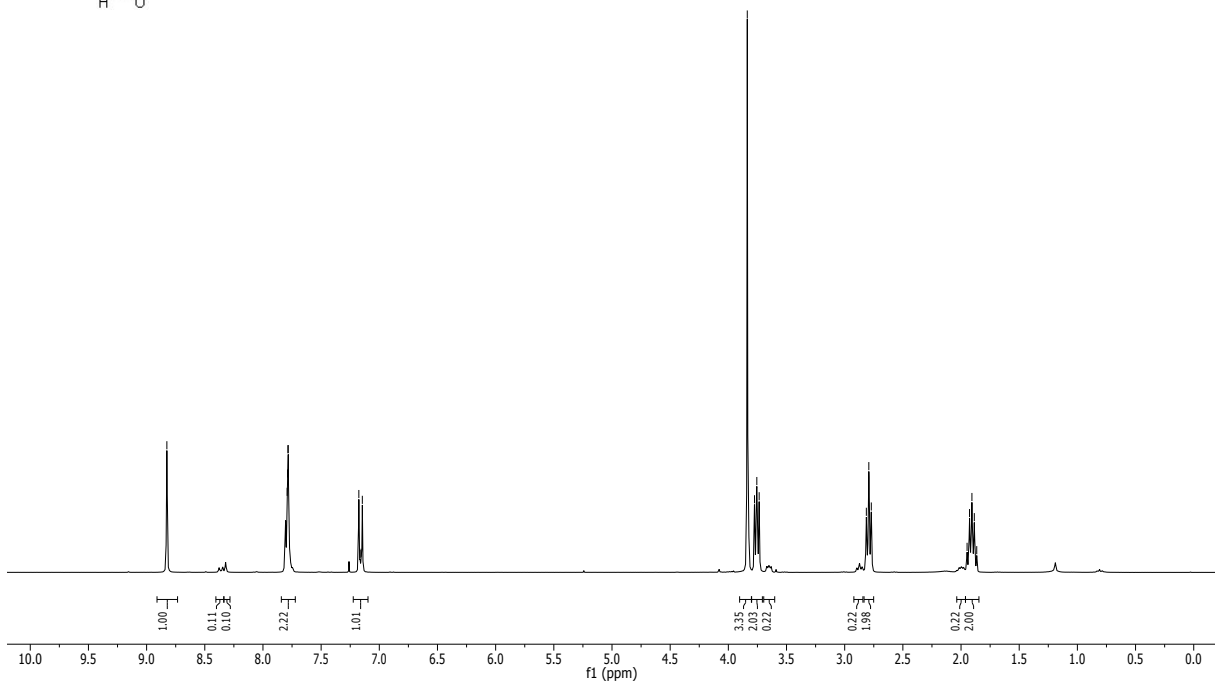

160926.f343.11.fid  
 Sahoo BS-339  
 C13CPD CDCl3 {C:\Bruker\TopSpin3.2PL6} 1609 43

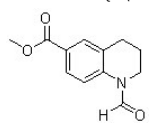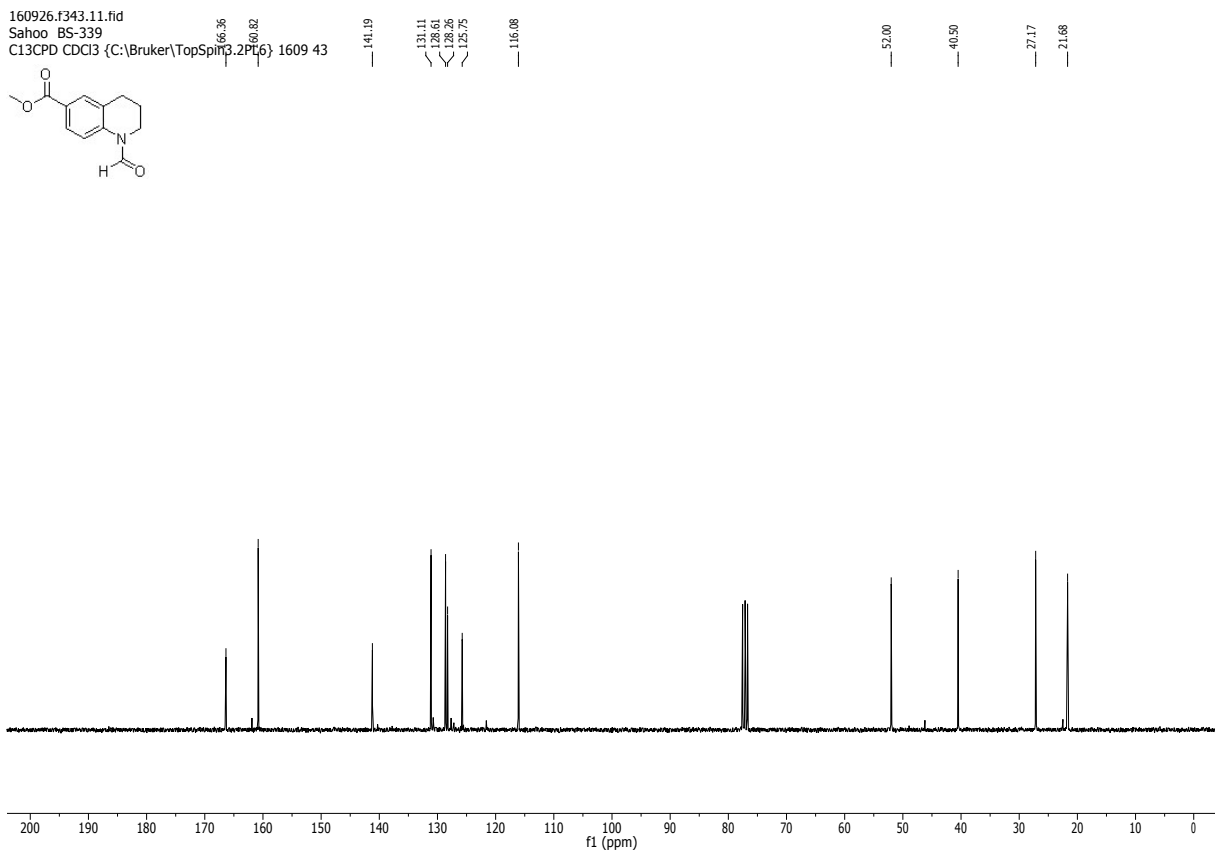



160919.308.10.hd  
 Sahoo BS-FC-334  
 Au1H CDCl3 /opt/topspin 1609 8

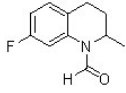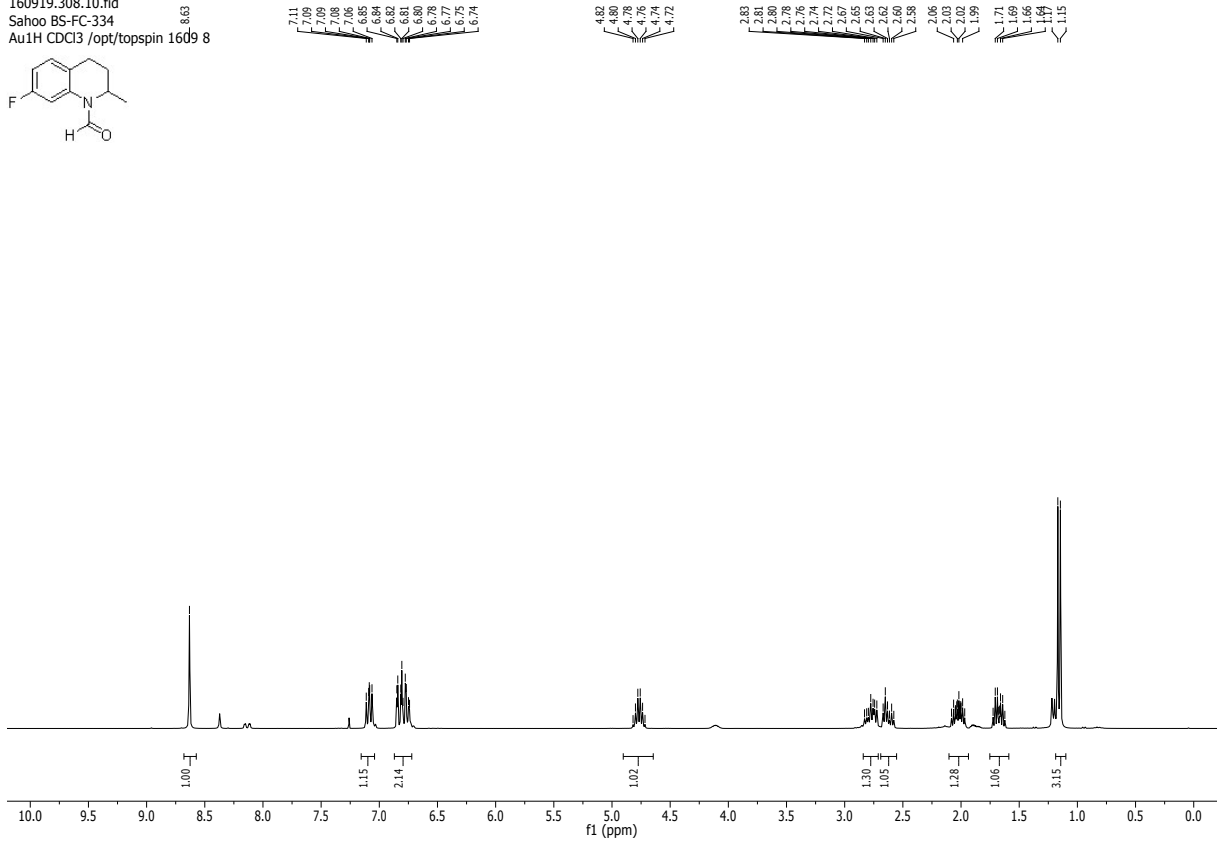

160919.308.11.fid  
 Sahoo BS-FC-334  
 Au13C CDCl3 /opt/topspin 1609 8

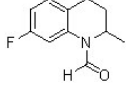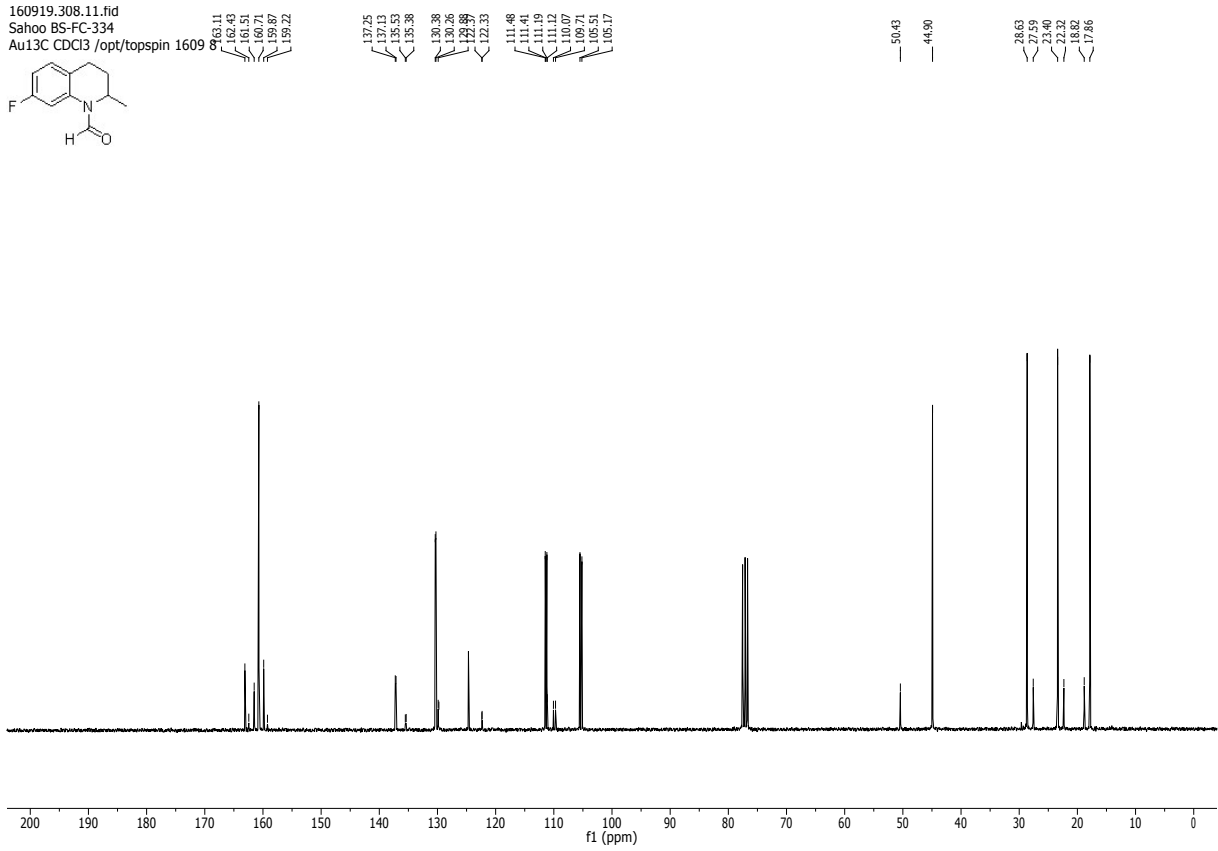

16092/.522.10.fid  
Sahoo, BS-334-R, 19F{1H}  
Au19F CDCl3 /opt/topspin 1609 22

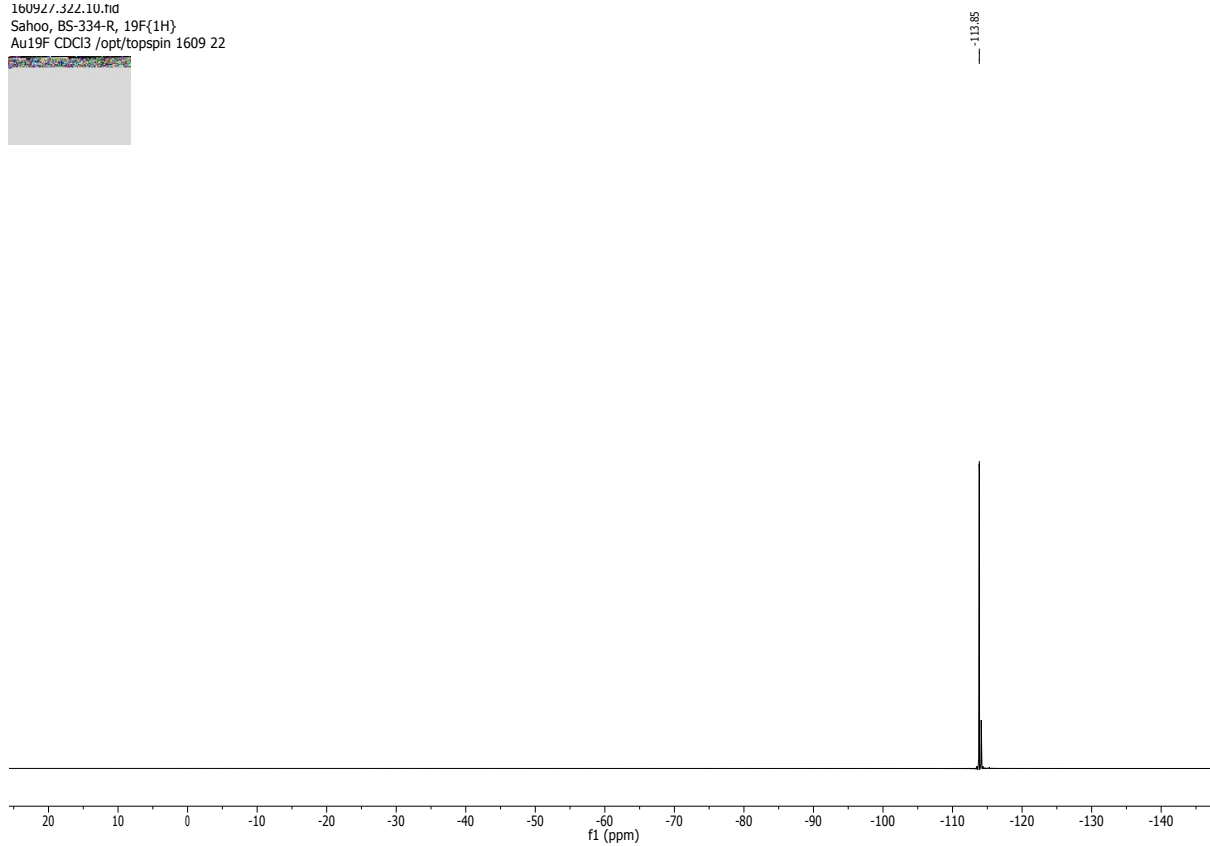

161028.430.10.1.1r  
Feng Chen cf-1755  
Au1H CDCl3 /opt/topspin 1610 30

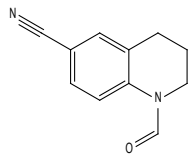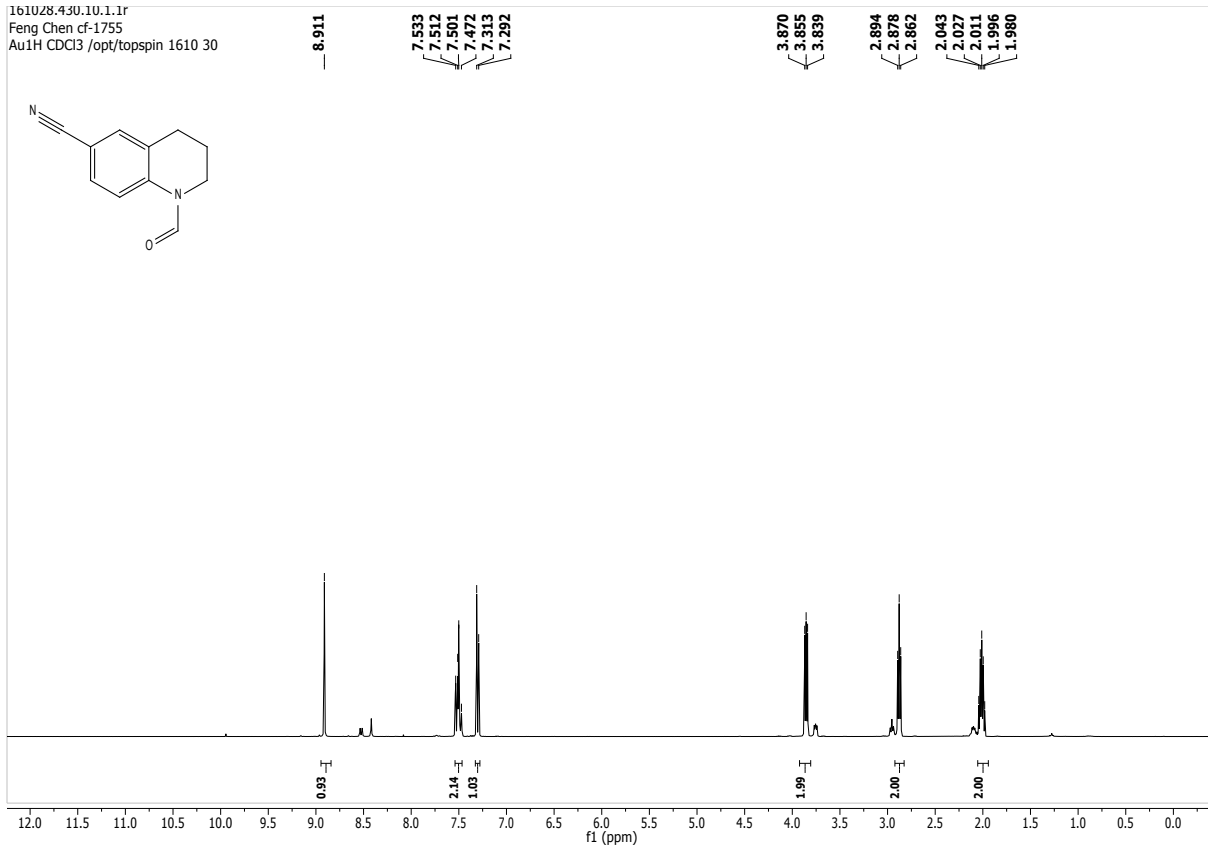

161028.430.11.1.1r  
Feng Chen cf-1755  
Au13C CDCl3 /opt/topspin 1610 30

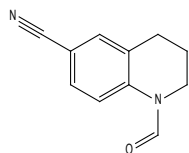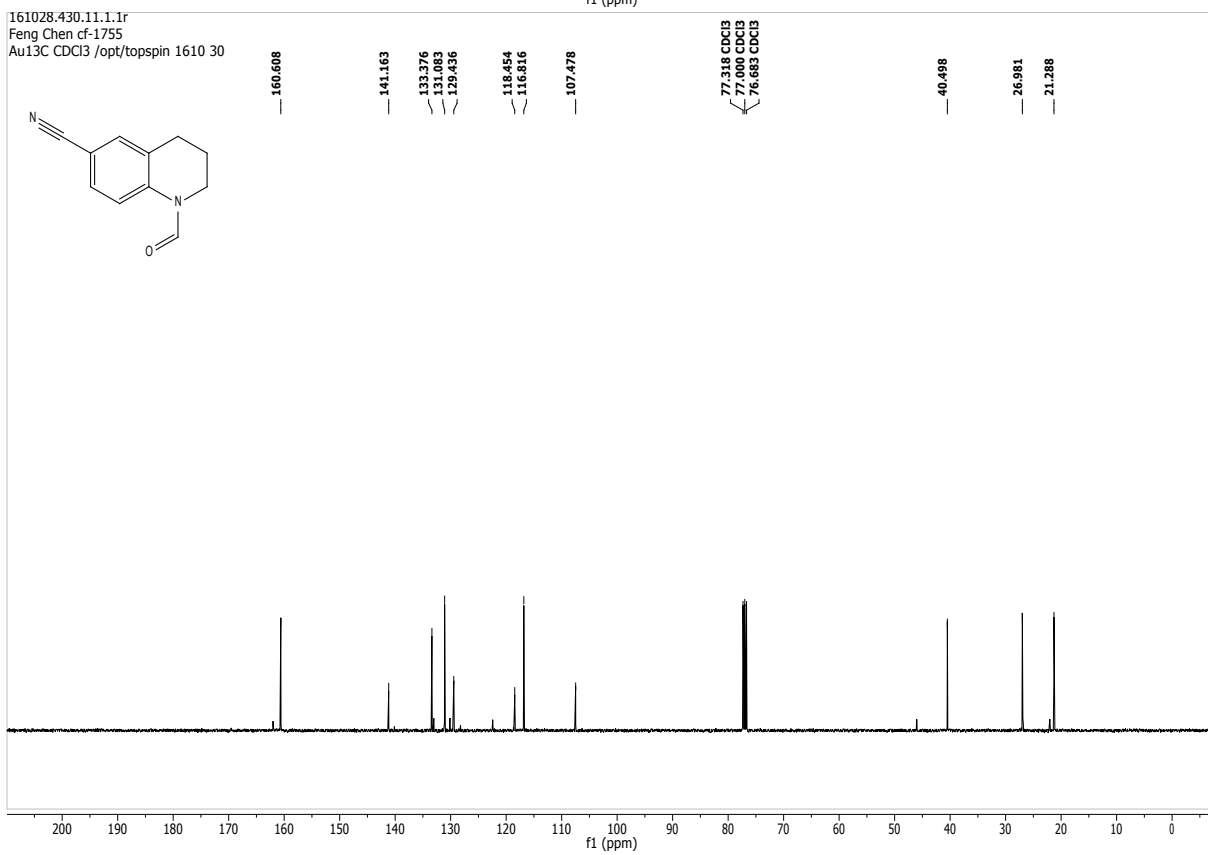

161221.324.10.1.r  
Chen cf-1845  
Au1H DMSO /opt/topspin 1612 24

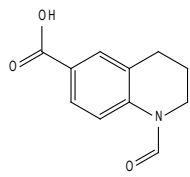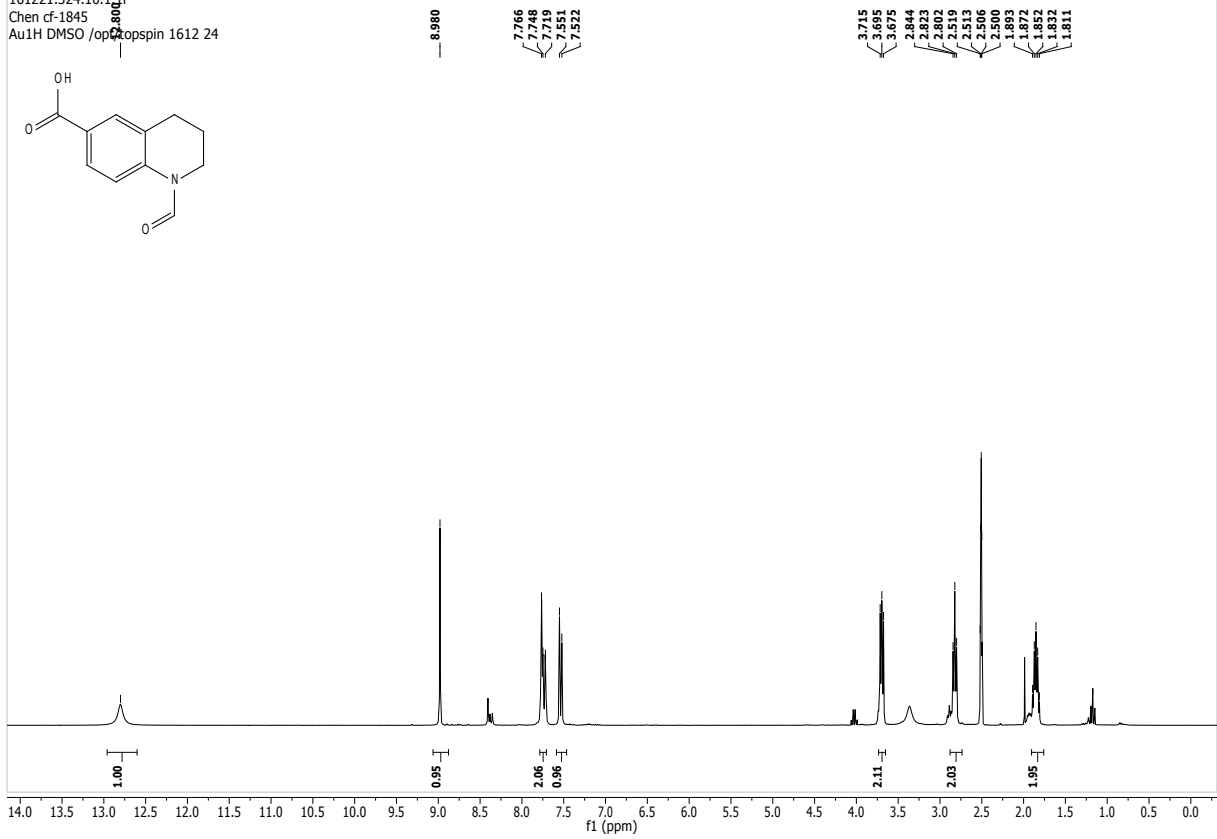

161221.324.11.1.r  
Chen cf-1845  
Au13C DMSO /opt/topspin 1612 24

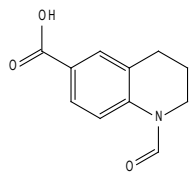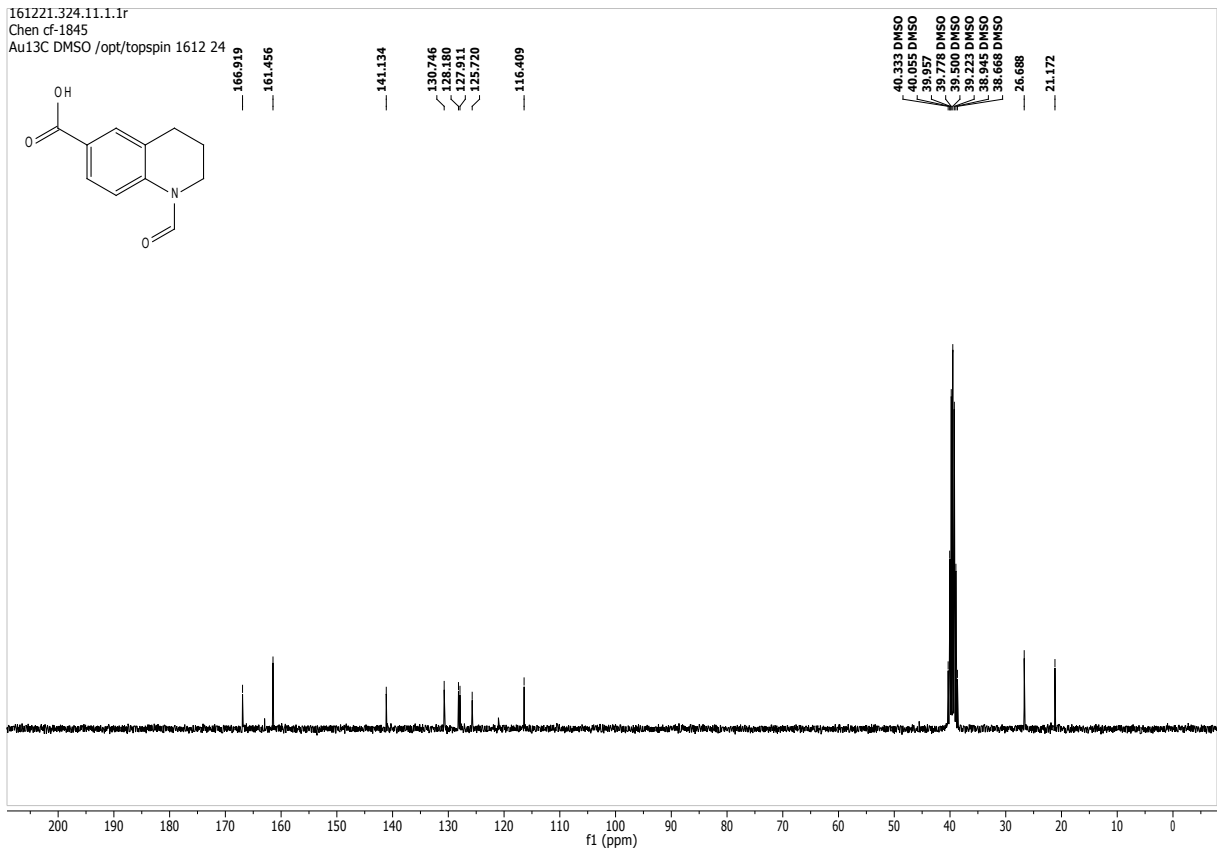

170119.332.10.1.1r  
Feng Chen / cf-1870-3  
Au1H CDCl3 /opt/topspin 1701 32

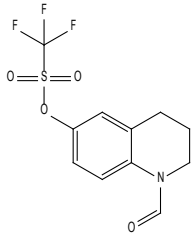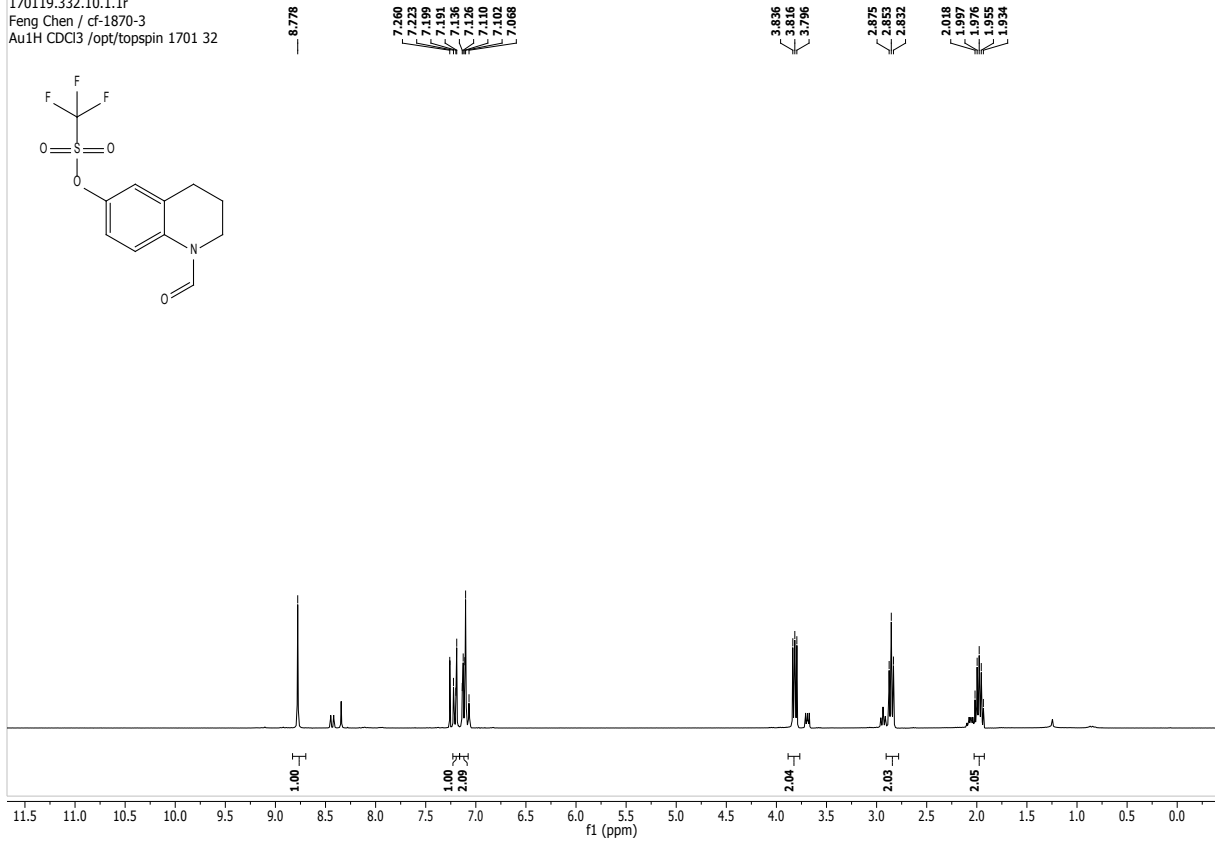

170119.332.11.1.1r  
Feng Chen / cf-1870-3  
Au13C CDCl3 /opt/topspin 1701 32

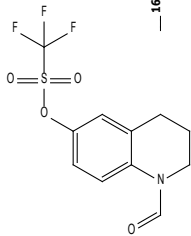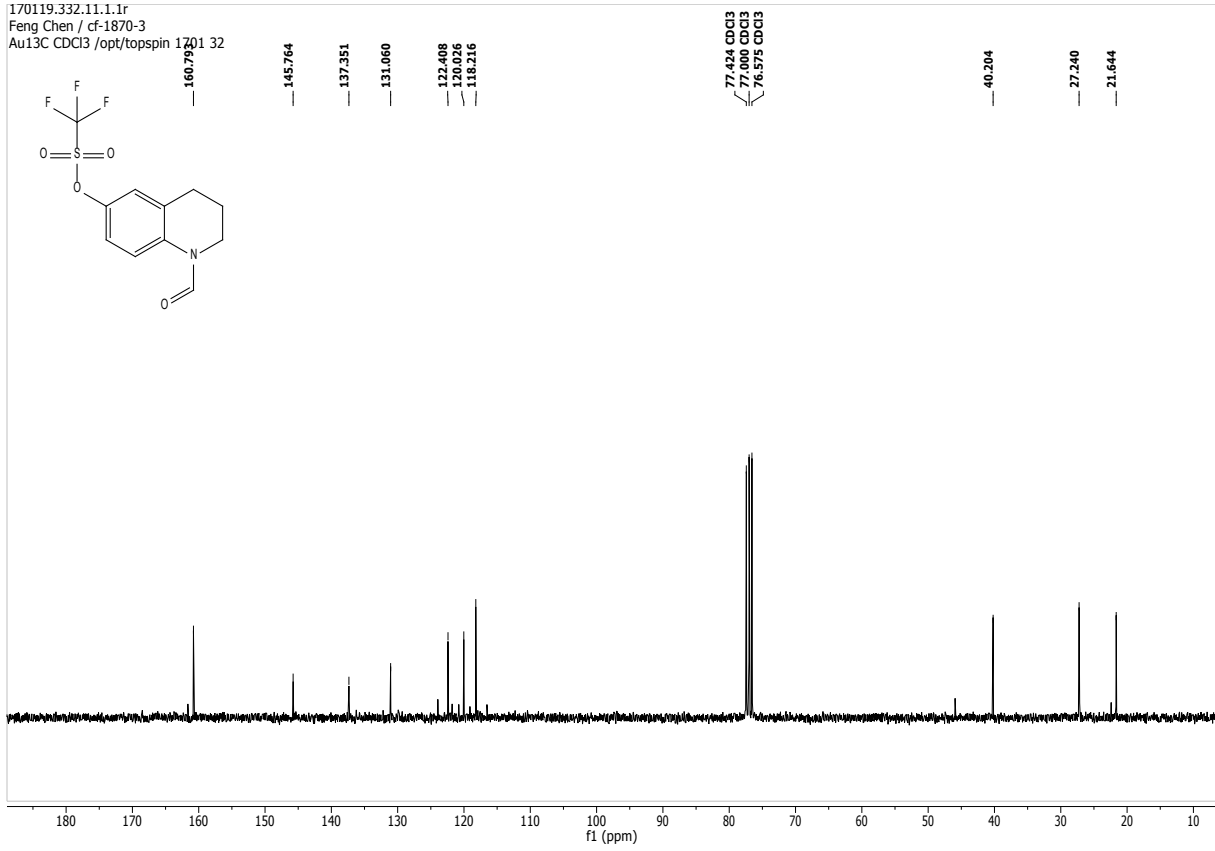

160919.307.10.hd  
Sahoo BS-FC-333  
Au1H CDCl3 /opt/topspin 1609 7

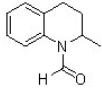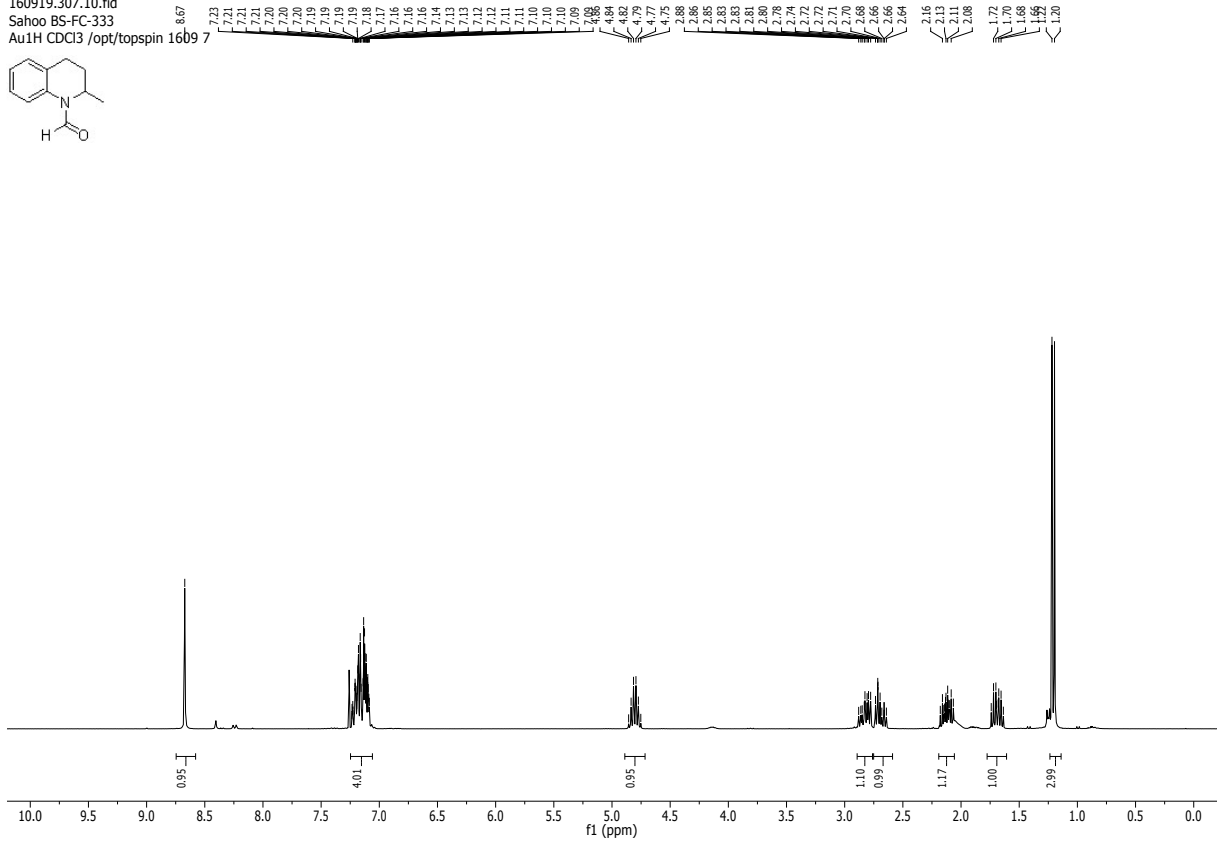

160919.307.11.fid  
Sahoo BS-FC-333  
Au13C CDCl3 /opt/topspin 1609 7

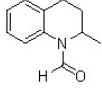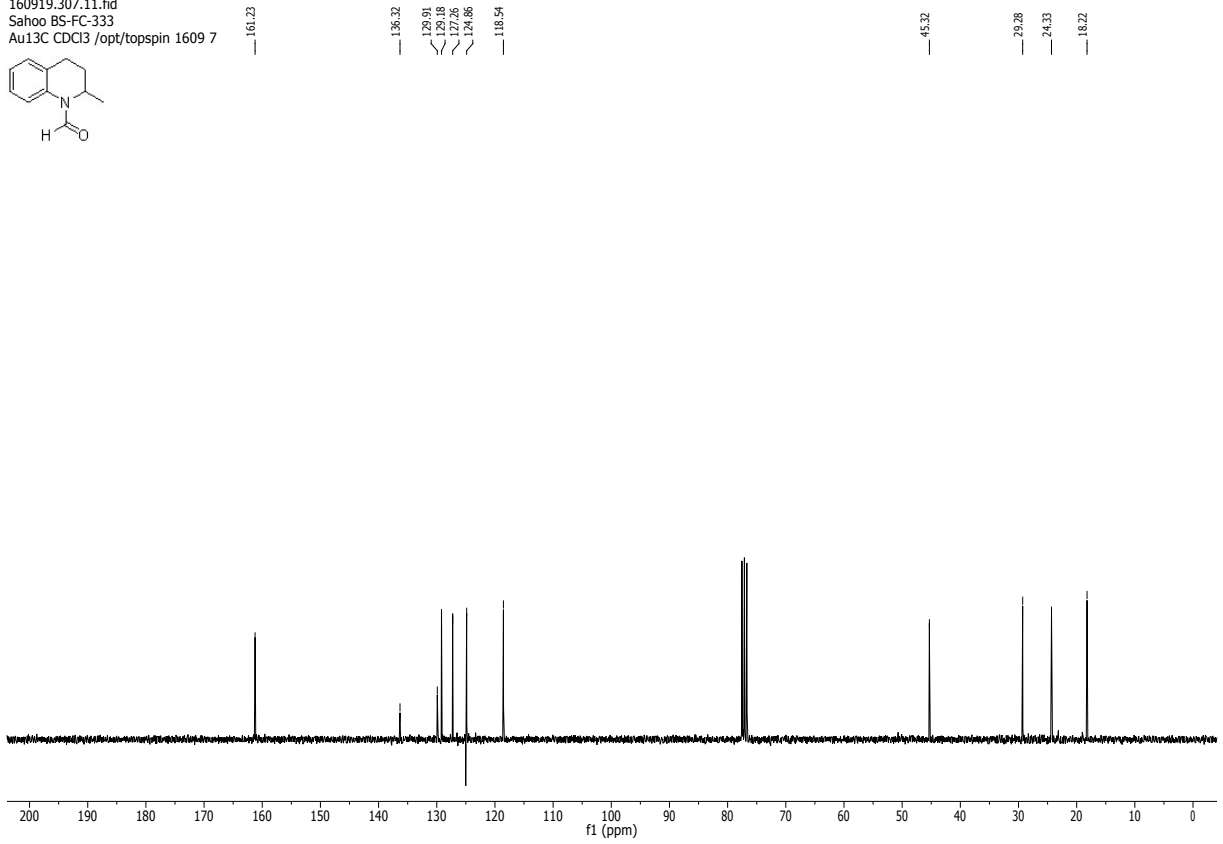

161012.337.10.1.1r  
Chen/ cf-1754-4  
Au1H CDCl3 /opt/topspin 1610 37

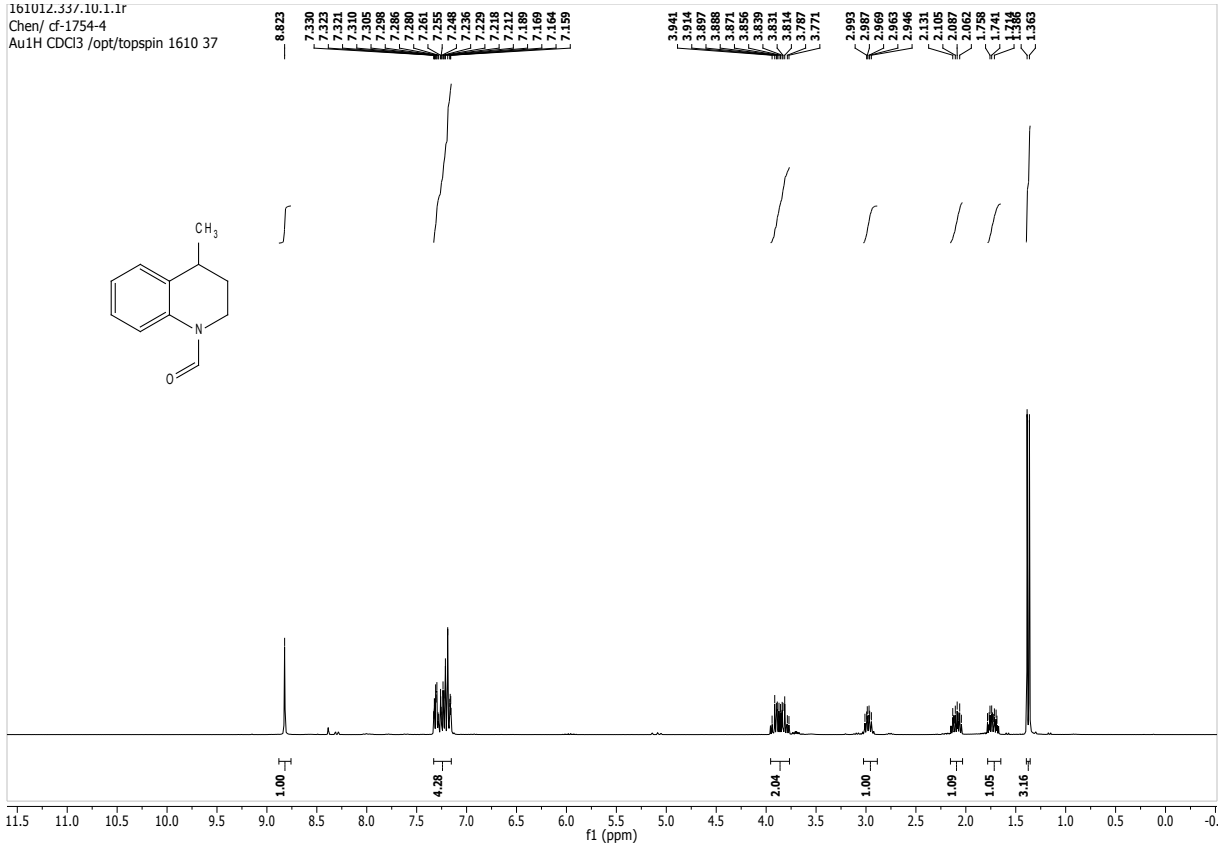

161012.337.11.1.1r  
Chen/ cf-1754-4  
Au13C CDCl3 /opt/topspin 1610 37

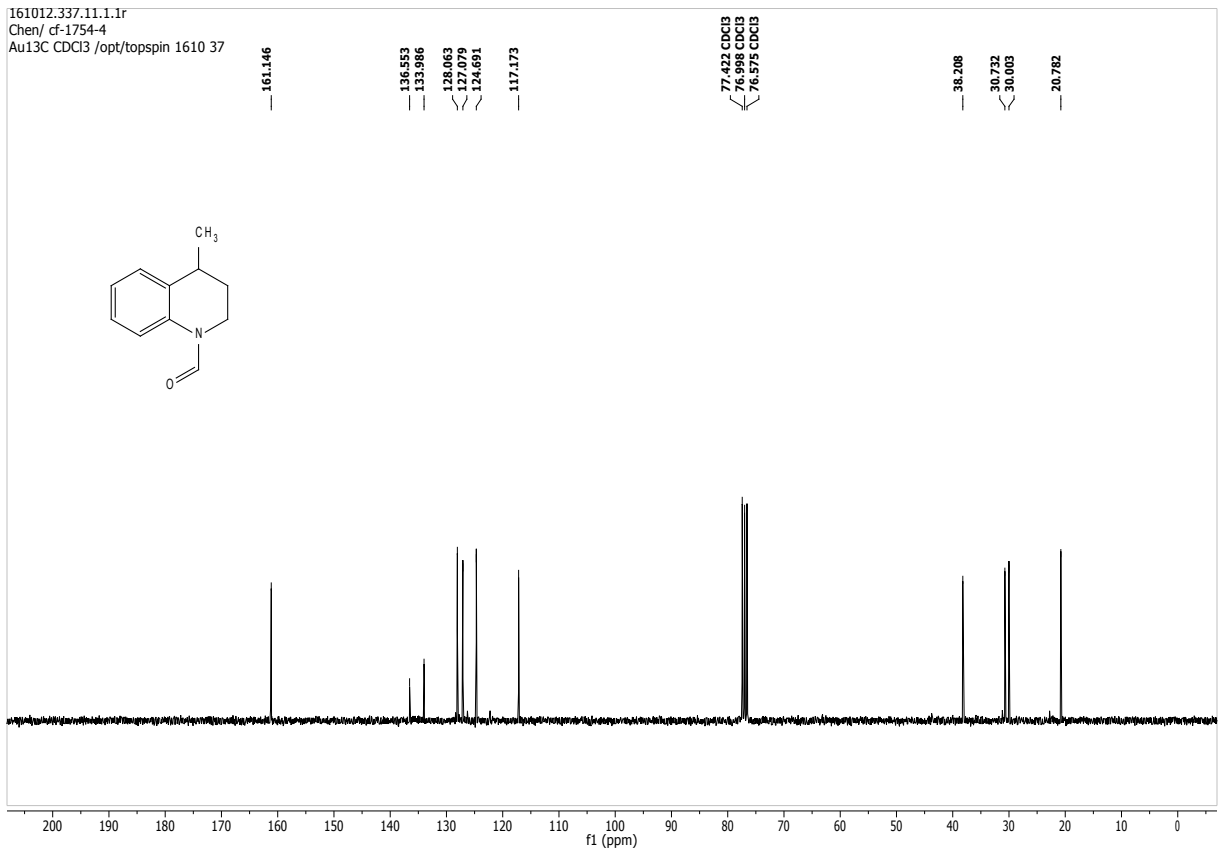

160929.f329.10.1.1r  
Feng Chen cf-1749  
PROTON CDCl3 {C:\Bruker\TopSpin3.2PL6}

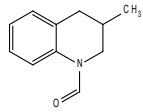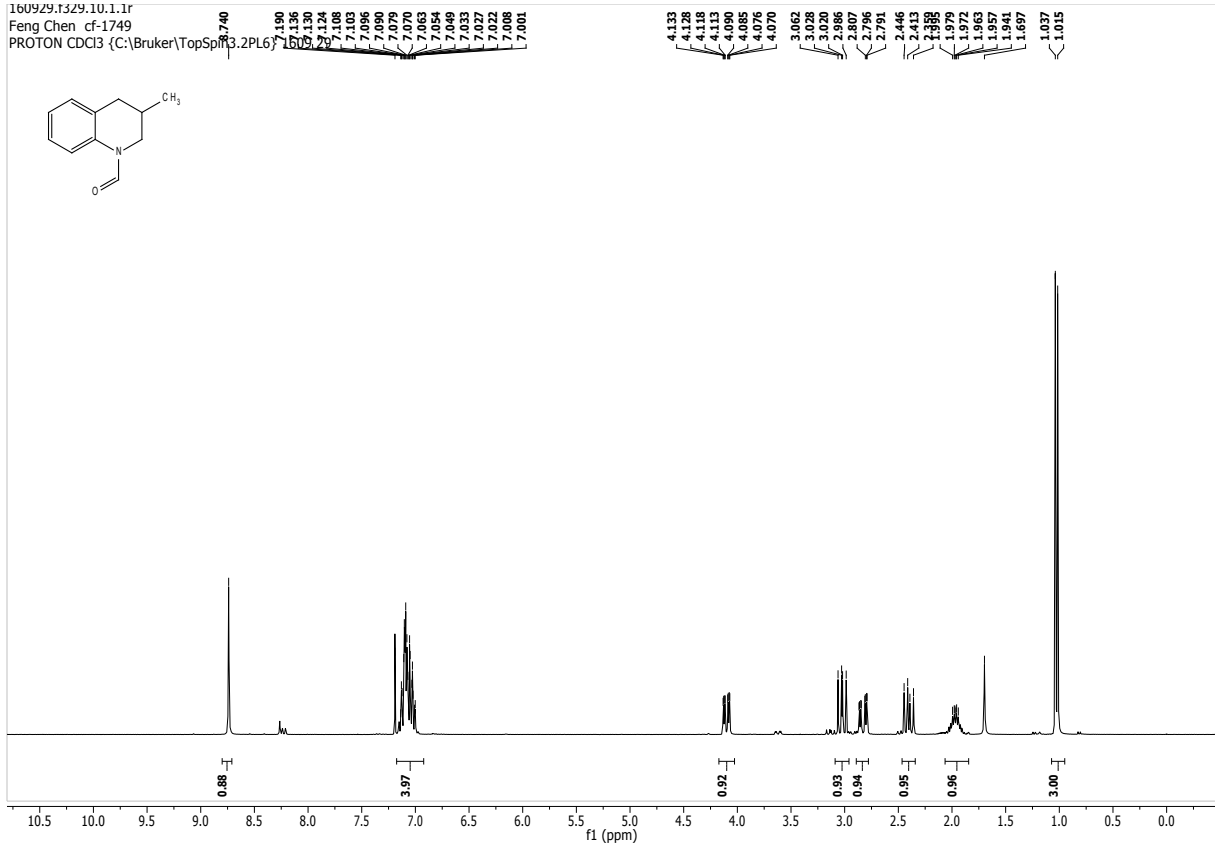

160929.f329.11.1.1r  
Feng Chen cf-1749  
C13CPD CDCl3 {C:\Bruker\TopSpin3.2PL6} 1609 29

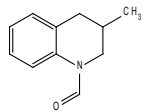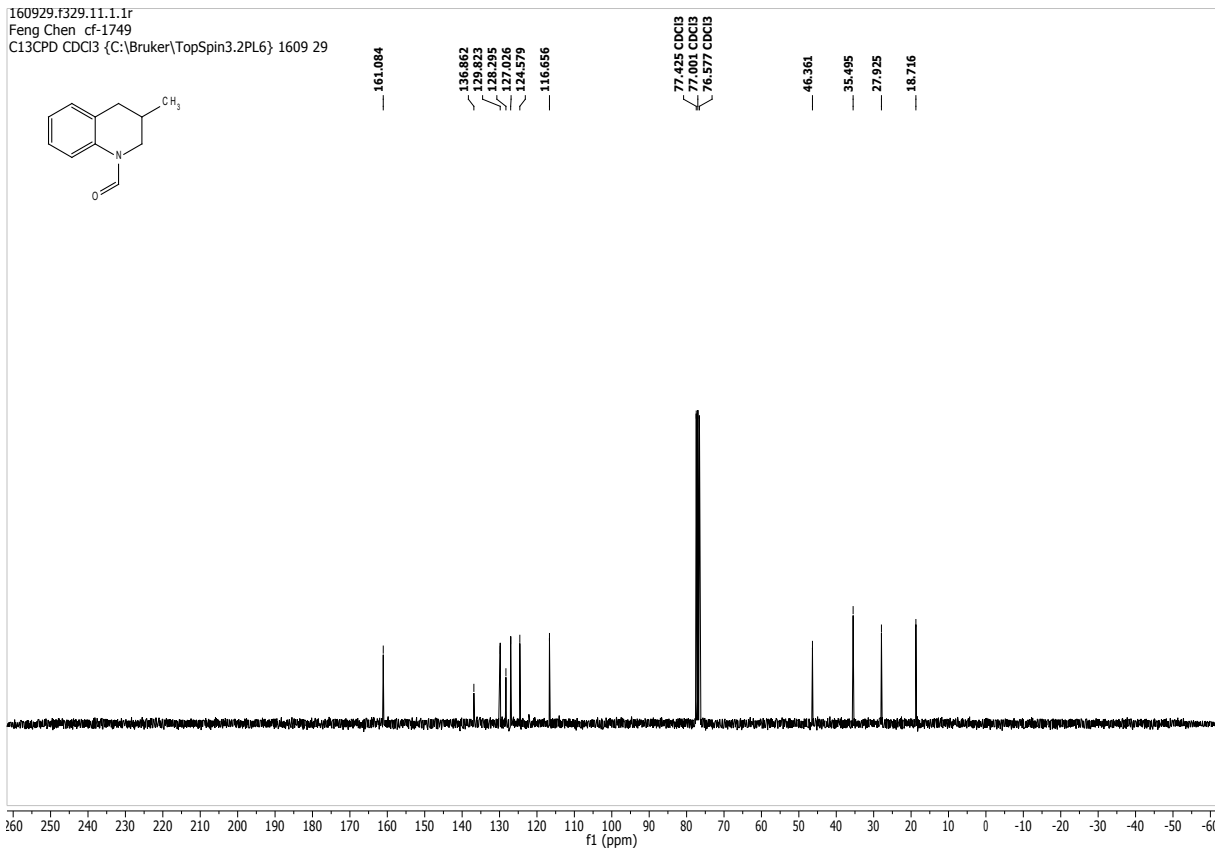



161018.f322.10.1.1r

Chen/ cf-1787

PROTON CDCl<sub>3</sub> {C:\Bruker\TopSpin3.2PL6} 1610 22

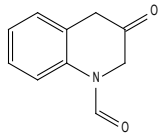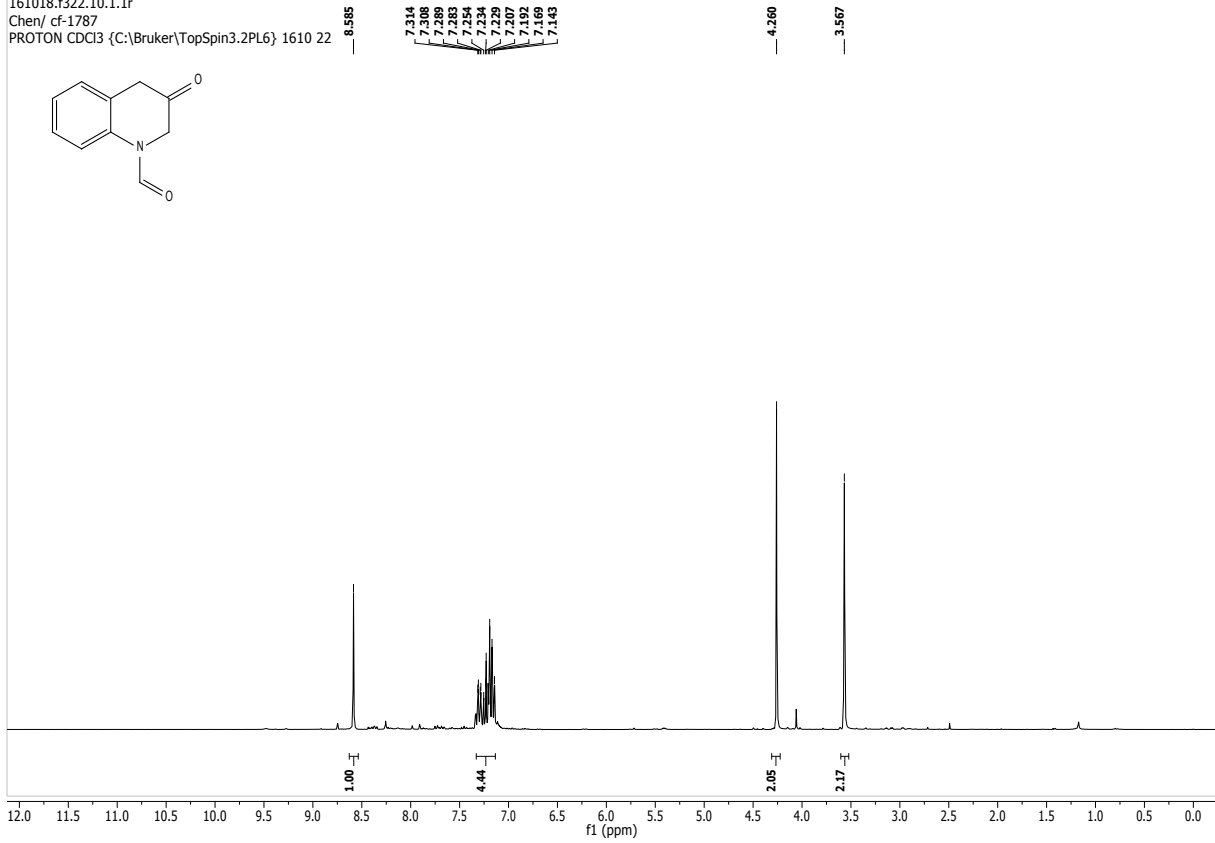

161018.f322.11.1.1r

Chen/ cf-1787

C13CPD CDCl<sub>3</sub> {C:\Bruker\TopSpin3.2PL6} 1610 22

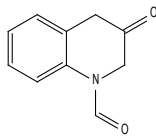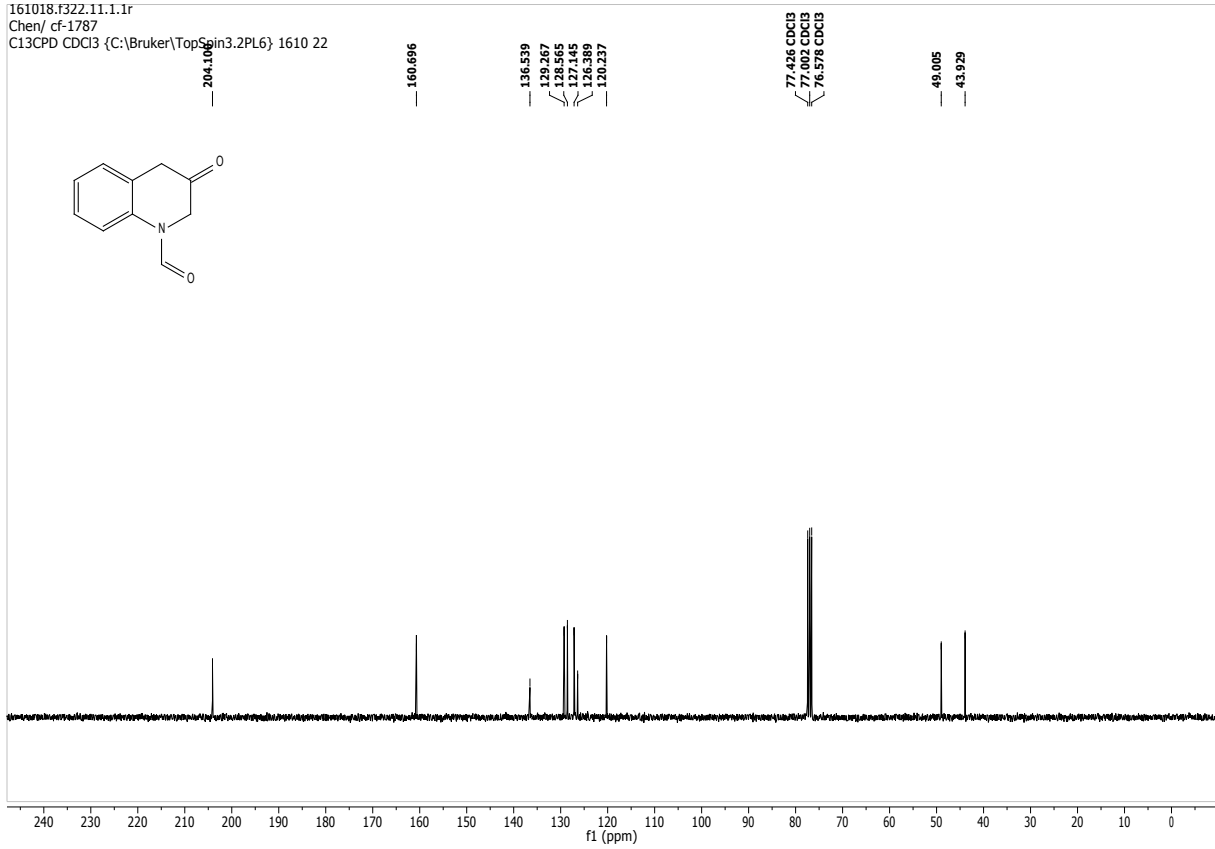

161028.431.10.1.1r  
Feng Chen cf-1759  
Au1H CDCl3 /opt/topspin 1610 31

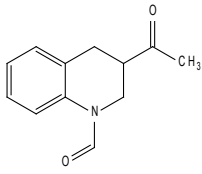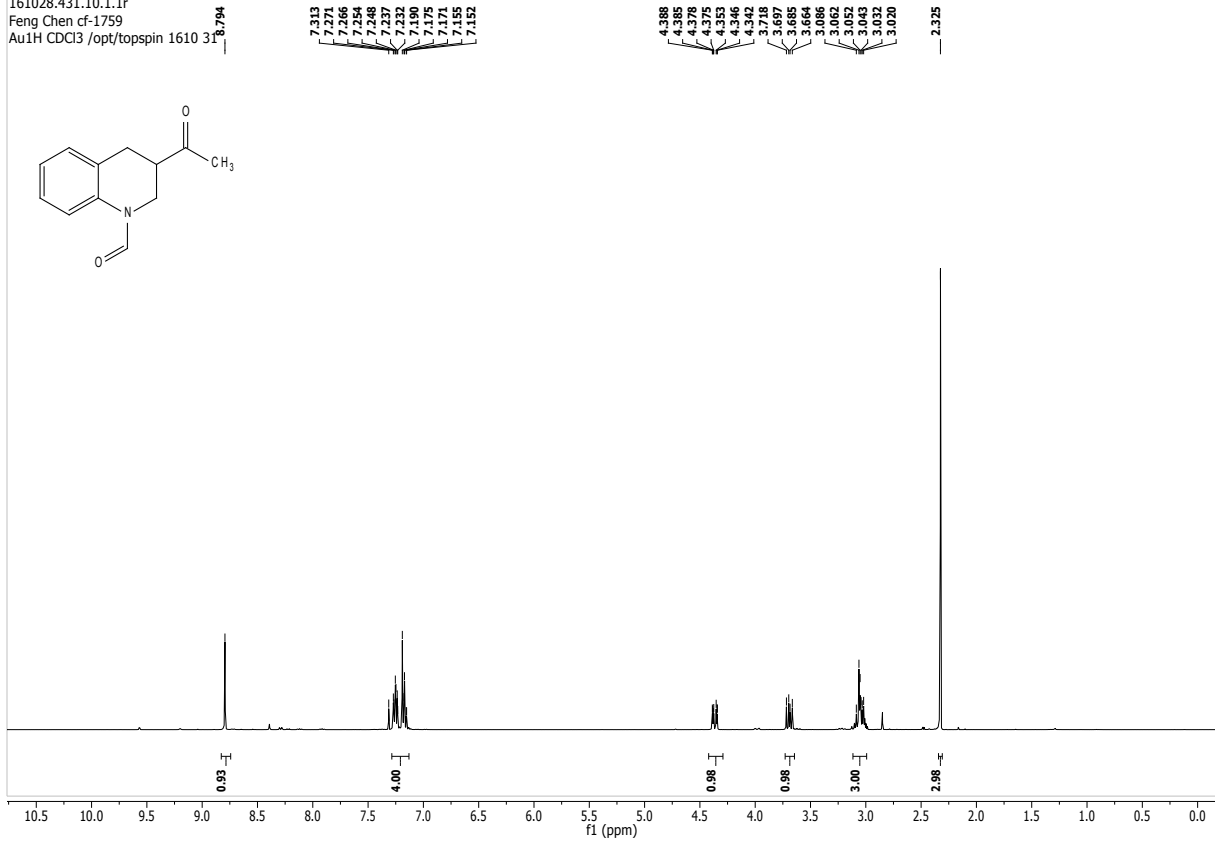

161028.431.11.1.1r  
Feng Chen cf-1759  
Au13C CDCl3 /opt/topspin 1610 31

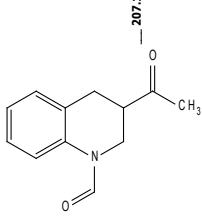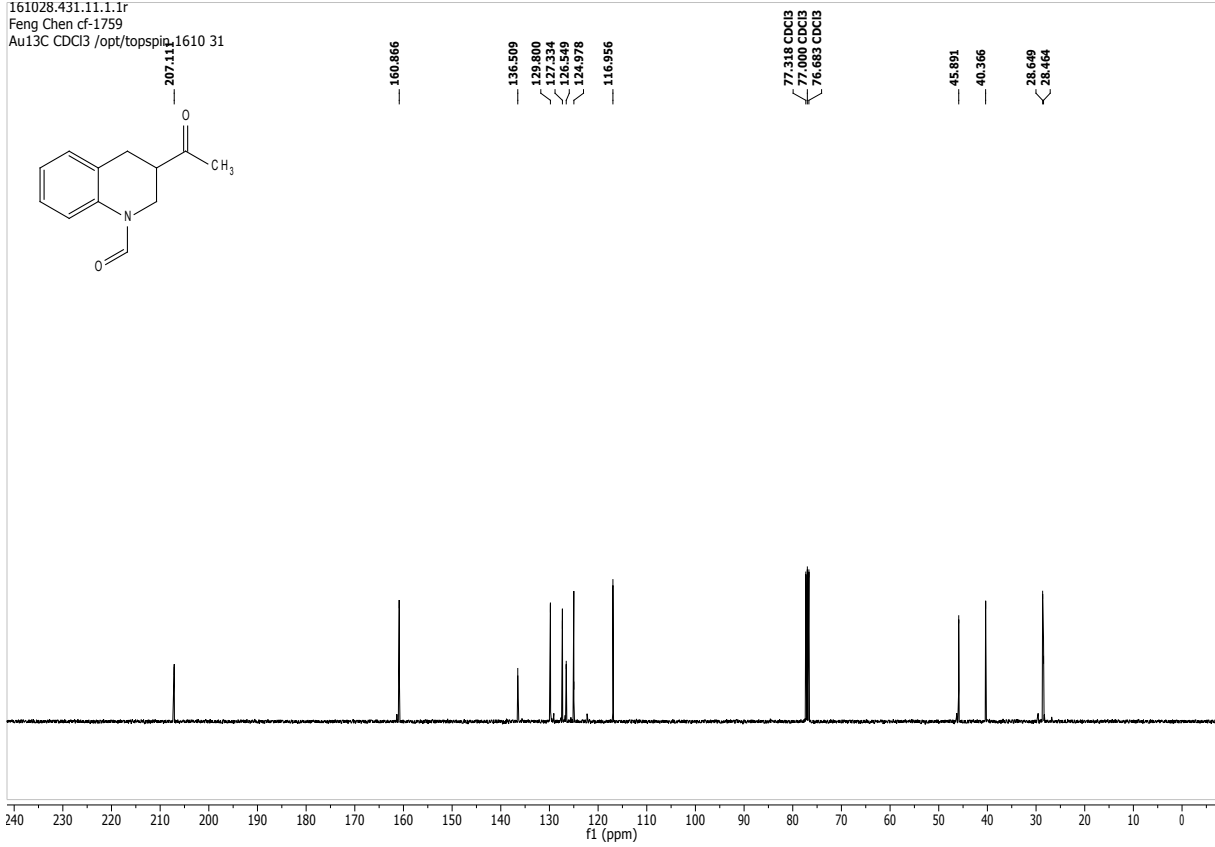

161012.338.11.1.1r  
Chen/ cf-1764  
Au1H CDCl3 /opt/topspin 1610 38

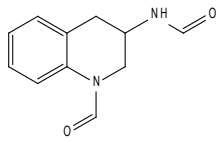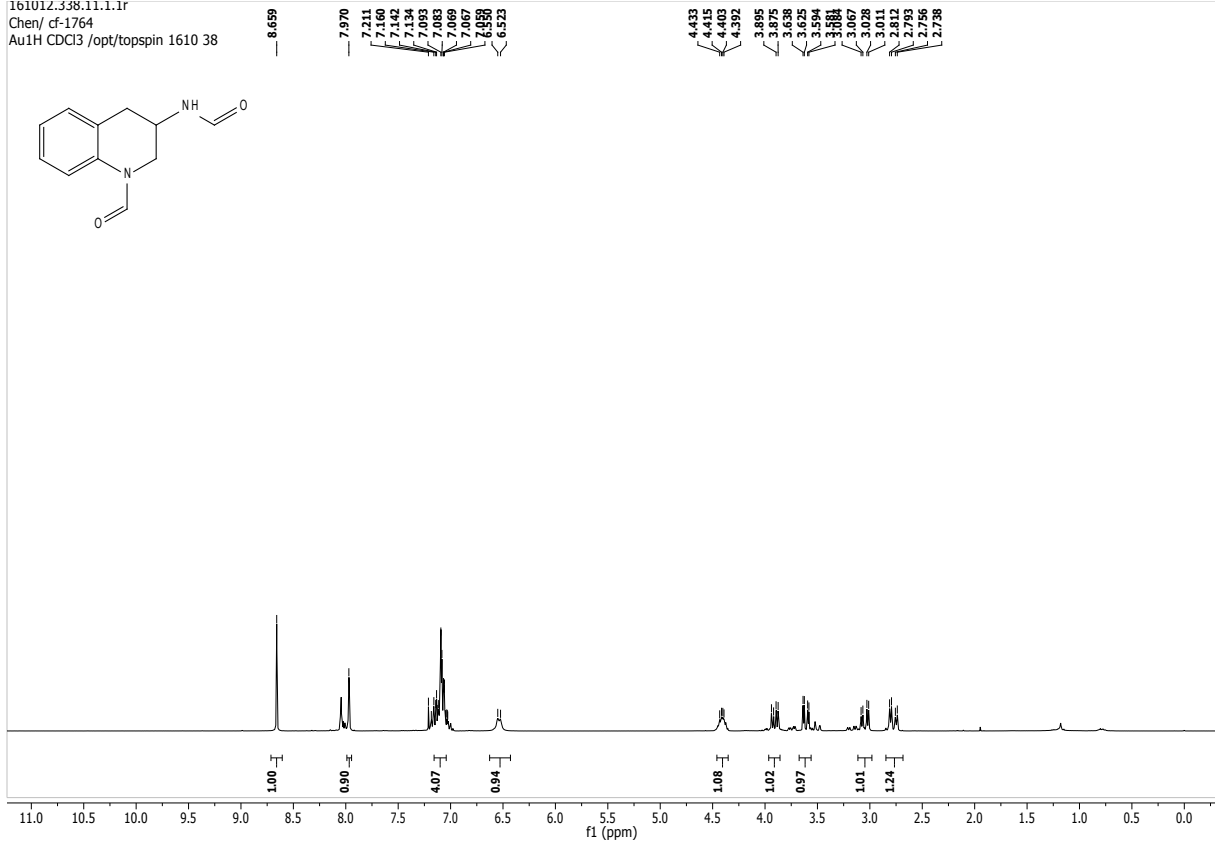

161012.338.10.1.1r  
Chen/ cf-1764  
Au13C CDCl3 /opt/topspin 1610 38

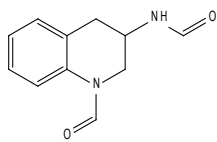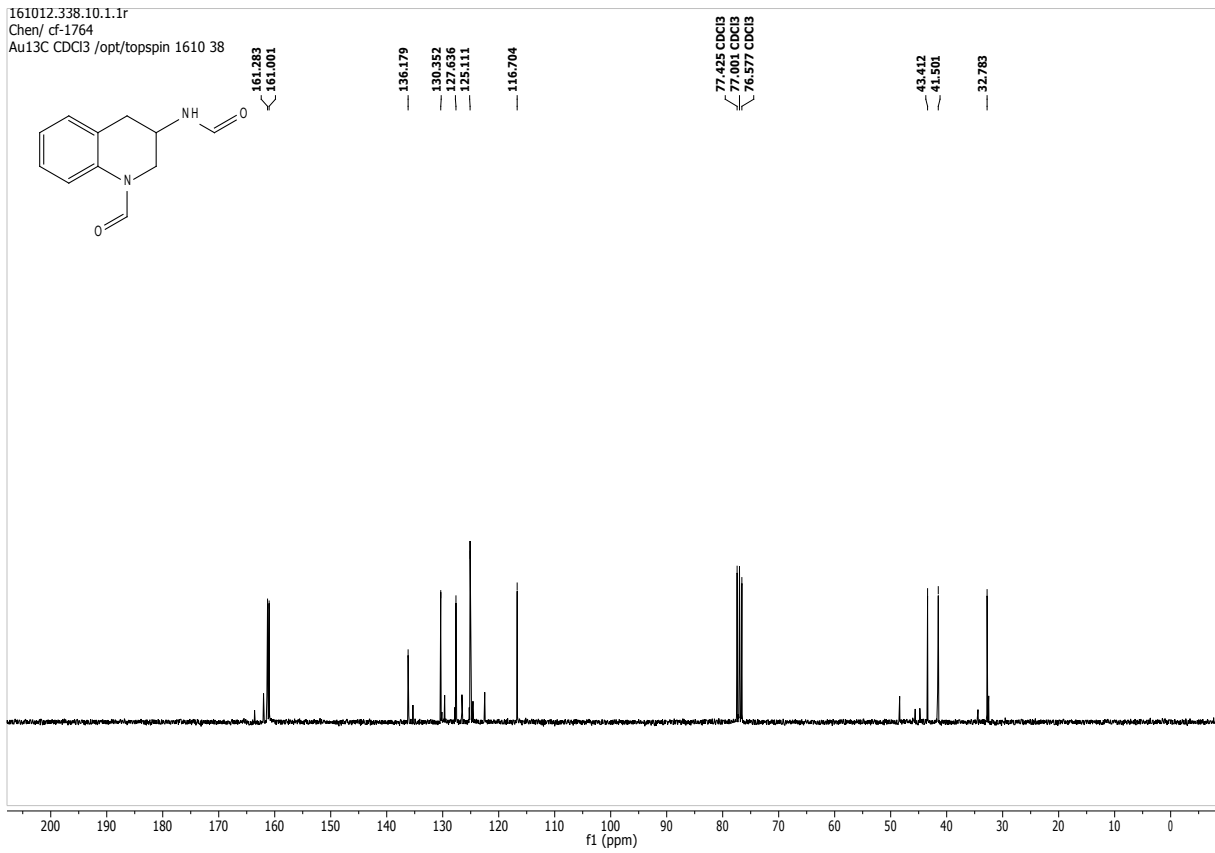

161004.f322.10.nd  
 Sahoo BS-345  
 PROTON CDCl3 {C:\Bruker\TopSpin3.2\PL6} 1610.22

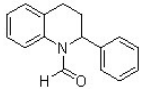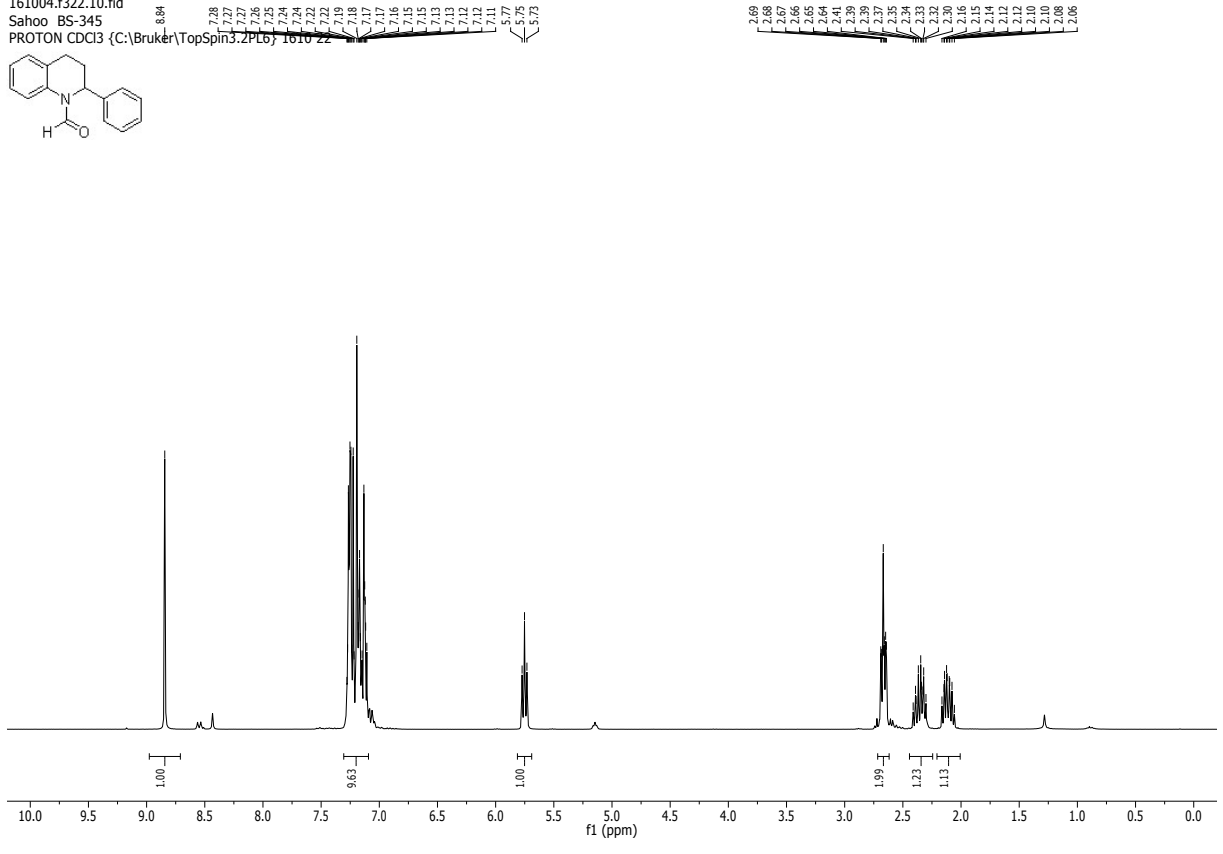

161004.f322.11.fid  
 Sahoo BS-345  
 C13CPD CDCl3 {C:\Bruker\TopSpin3.2\PL6} 1610.22

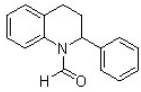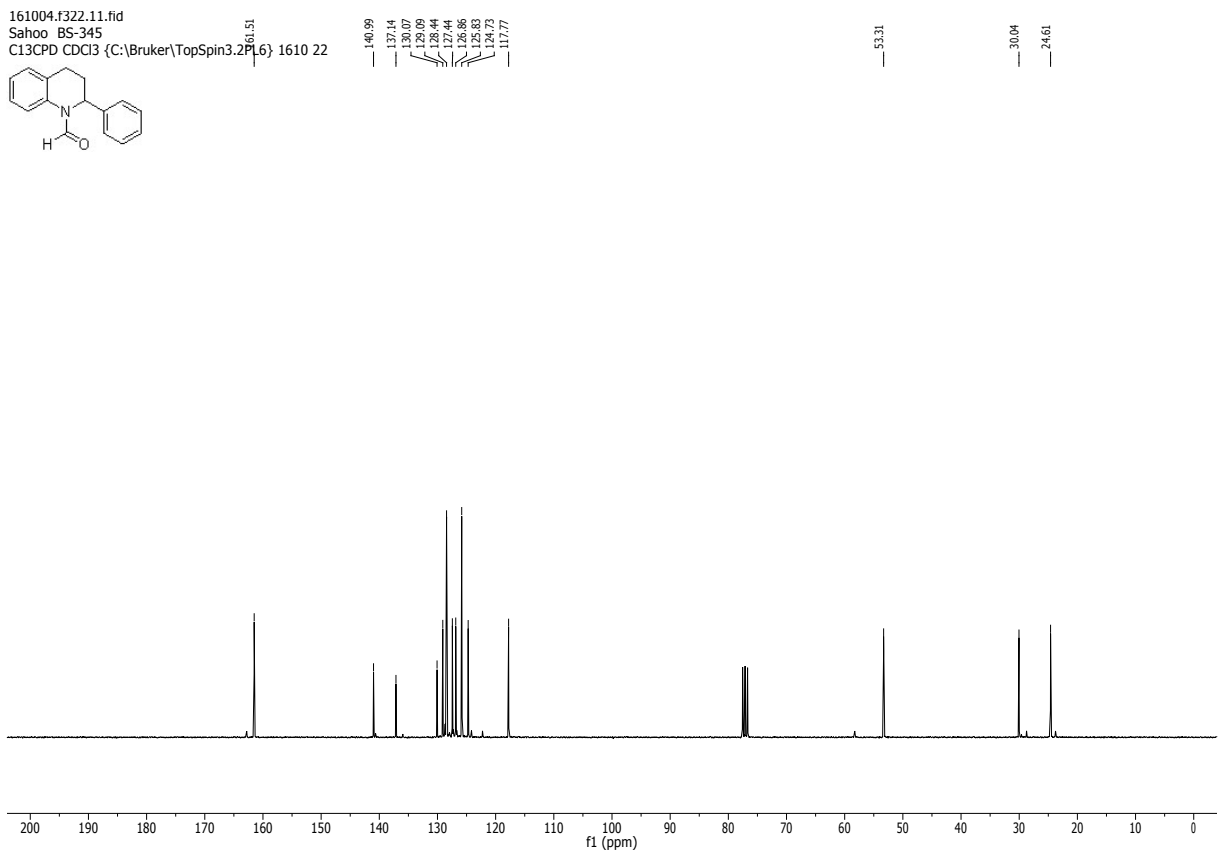

170112.410.10.1.1r  
F.Chen cf-BS-386  
Au1H CDCl3 /opt/topspin 1701 10

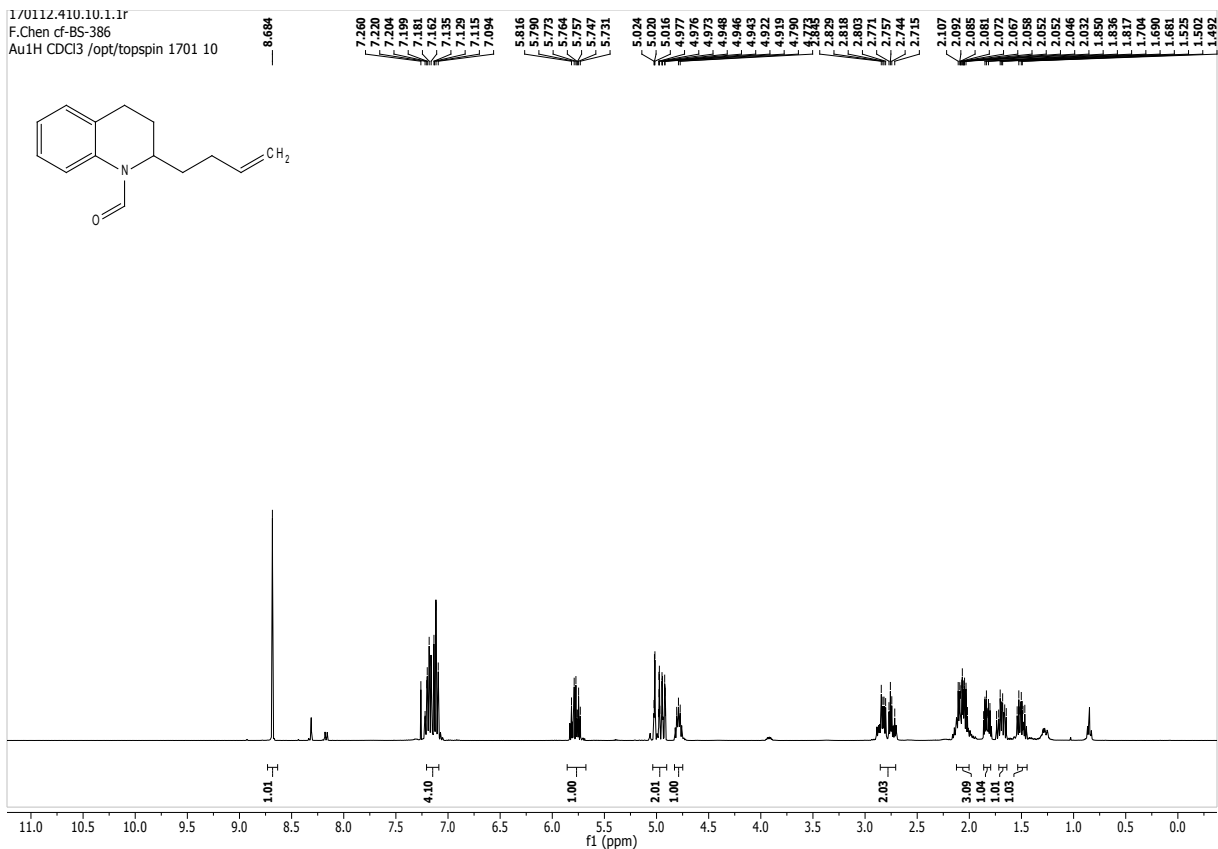

170112.410.11.1.1r  
F.Chen cf-BS-386  
Au13C CDCl3 /opt/topspin 1701 10

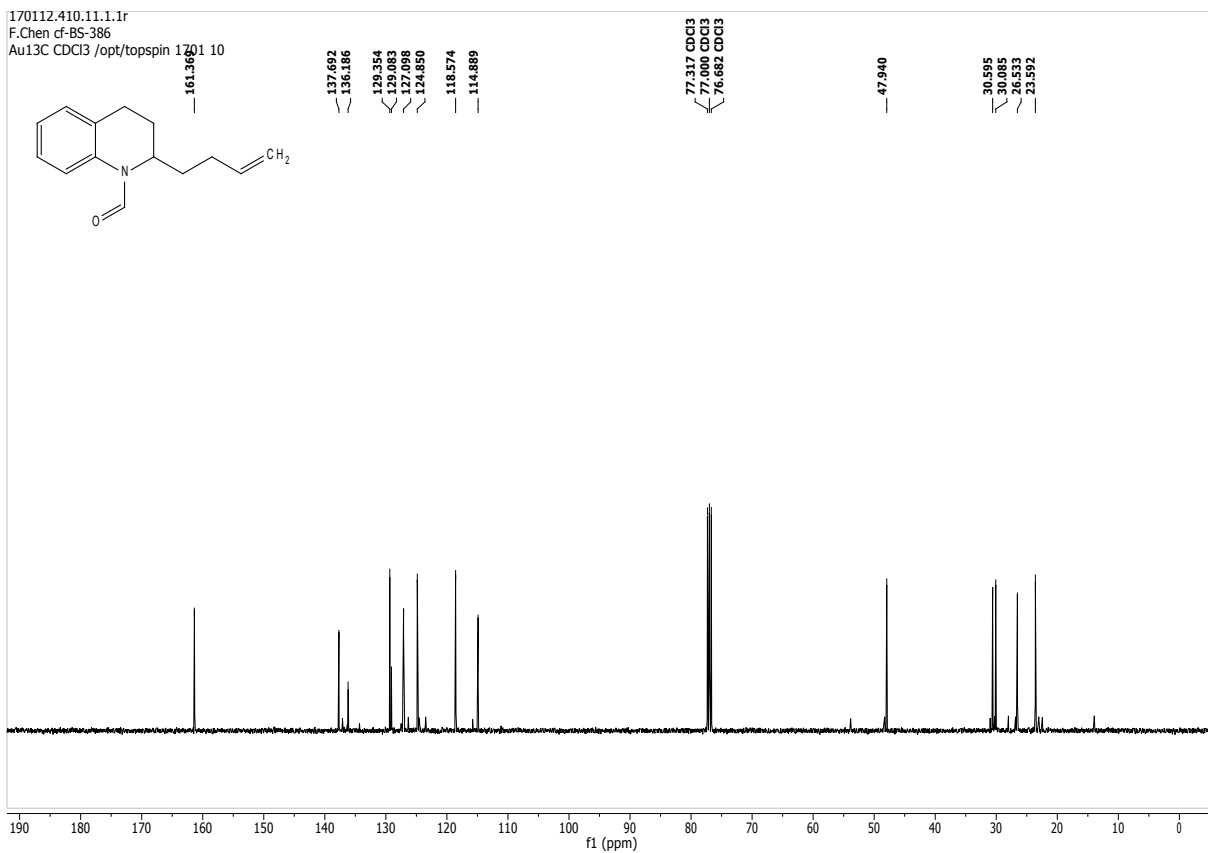

161018.f323.10.1.1r

Chen/ cf-1789

PROTON CDCl<sub>3</sub> {C:\Bruker\TopSpin3.2PL6} 1610 23

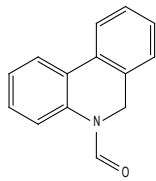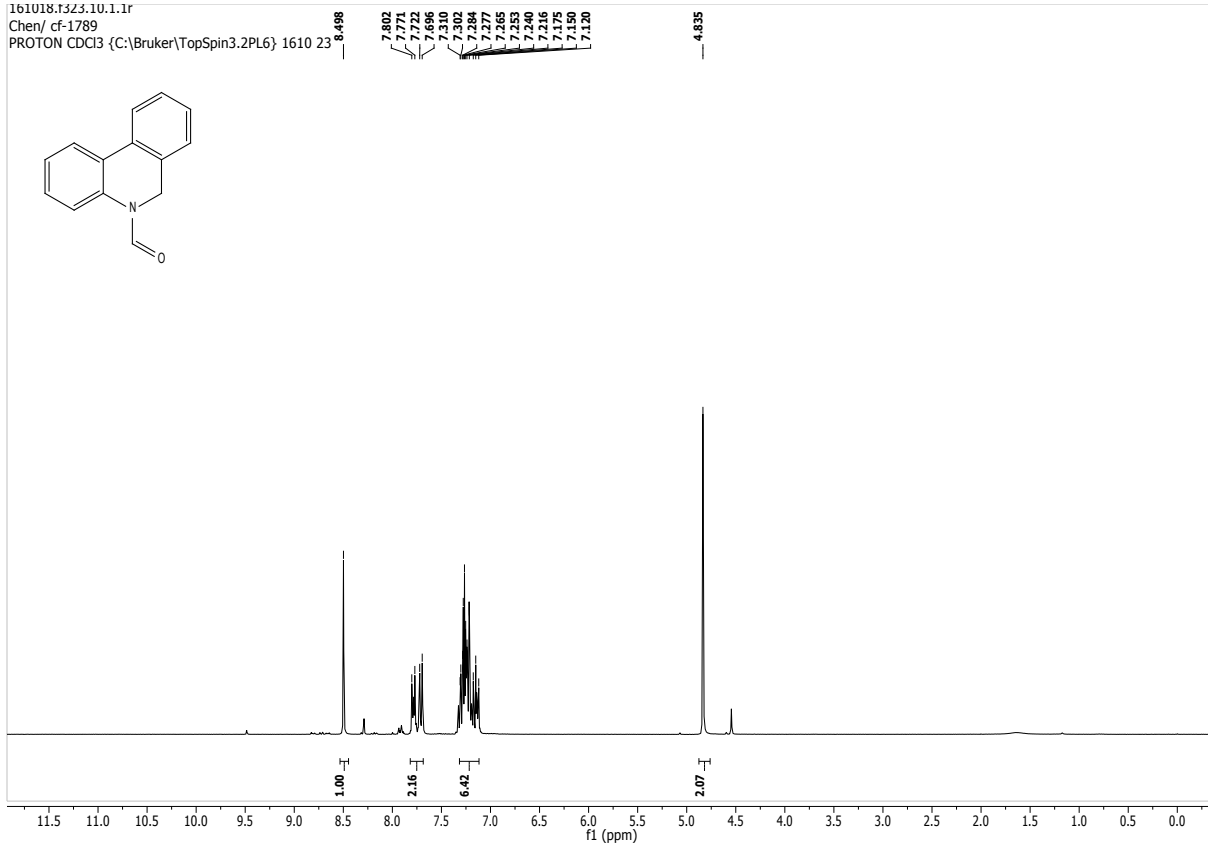

161018.f323.11.1.1r

Chen/ cf-1789

C13CPD CDCl<sub>3</sub> {C:\Bruker\TopSpin3.2PL6} 1610 23

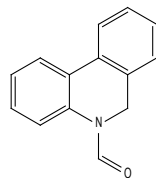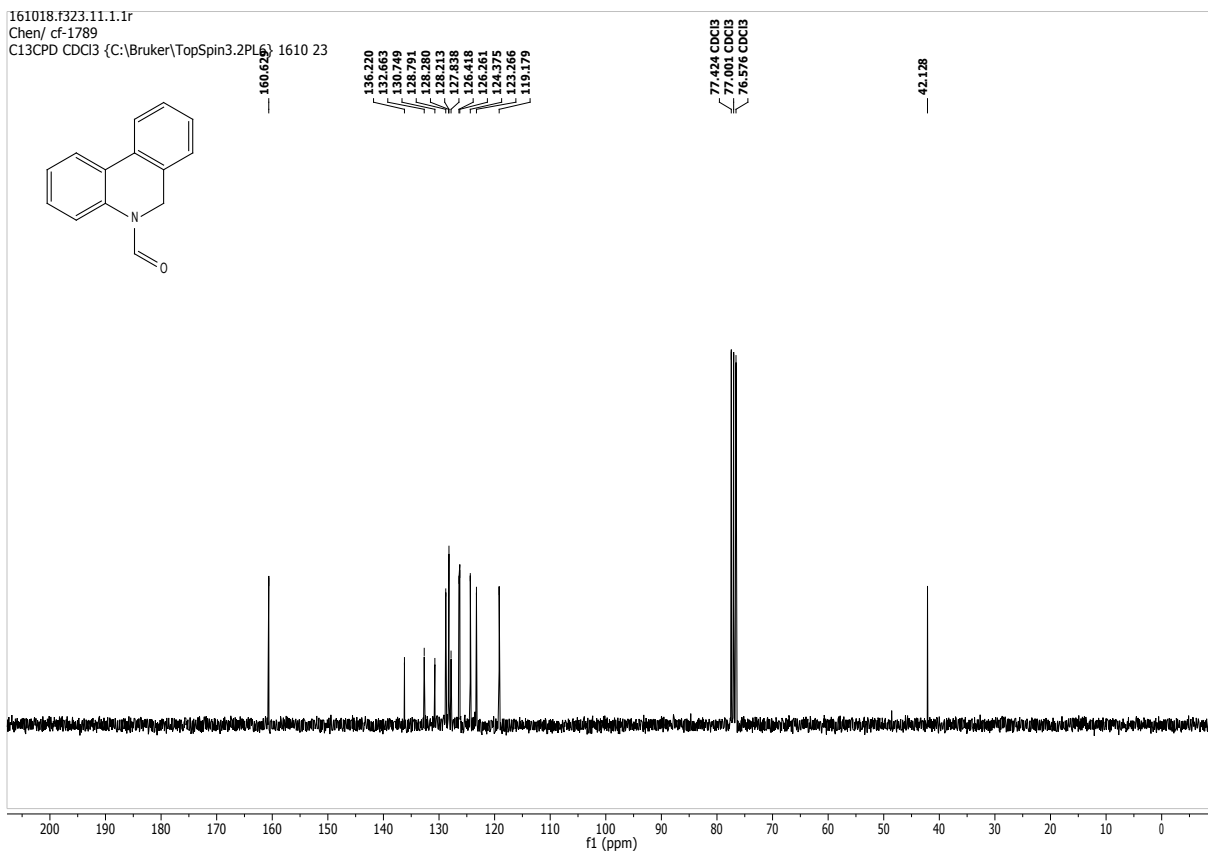

160929.f328.10.1.1r  
Feng Chen cf-1735  
PROTON CDCl3 {C:\Bruker\TopSpin3.2PL6} 1609 28

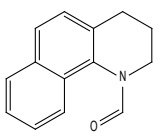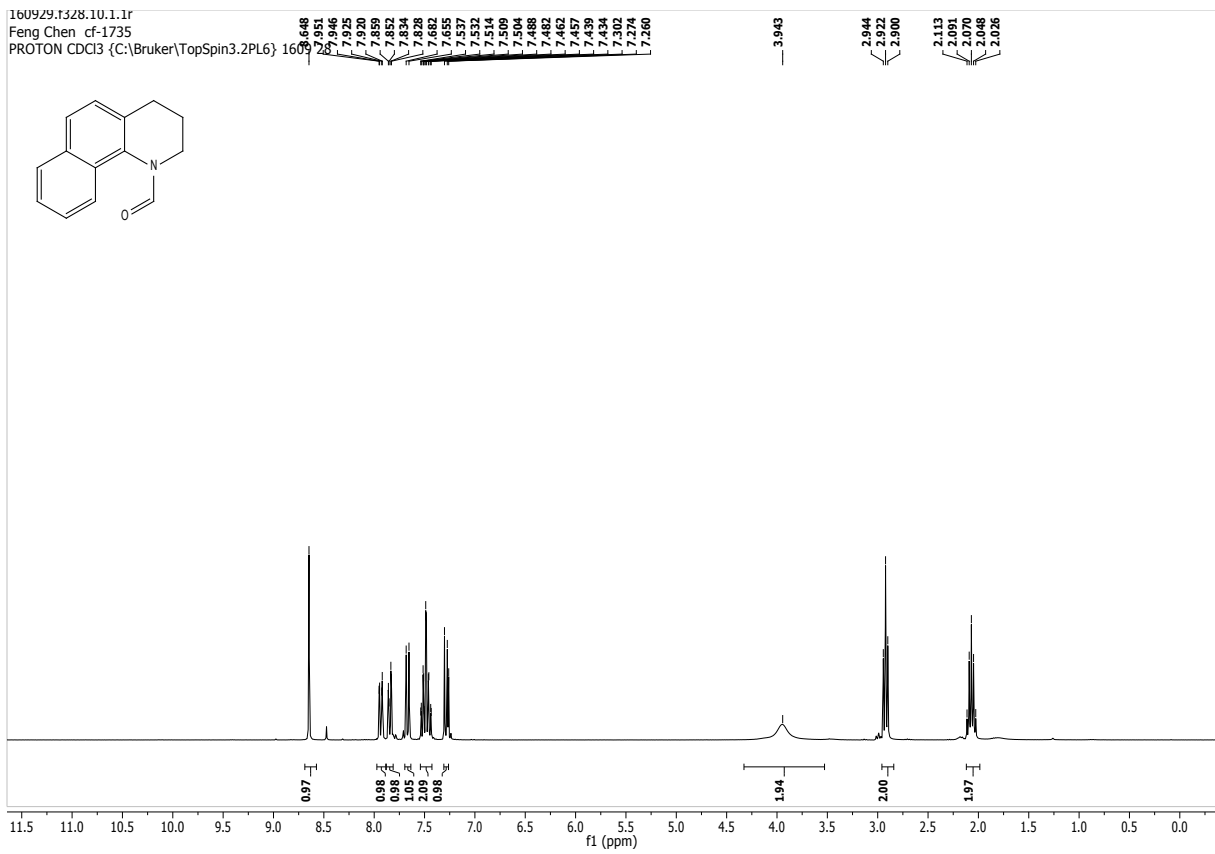

160929.f328.11.1.1r  
Feng Chen cf-1735  
C13CPD CDCl3 {C:\Bruker\TopSpin3.2PL6} 1609 28

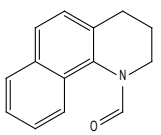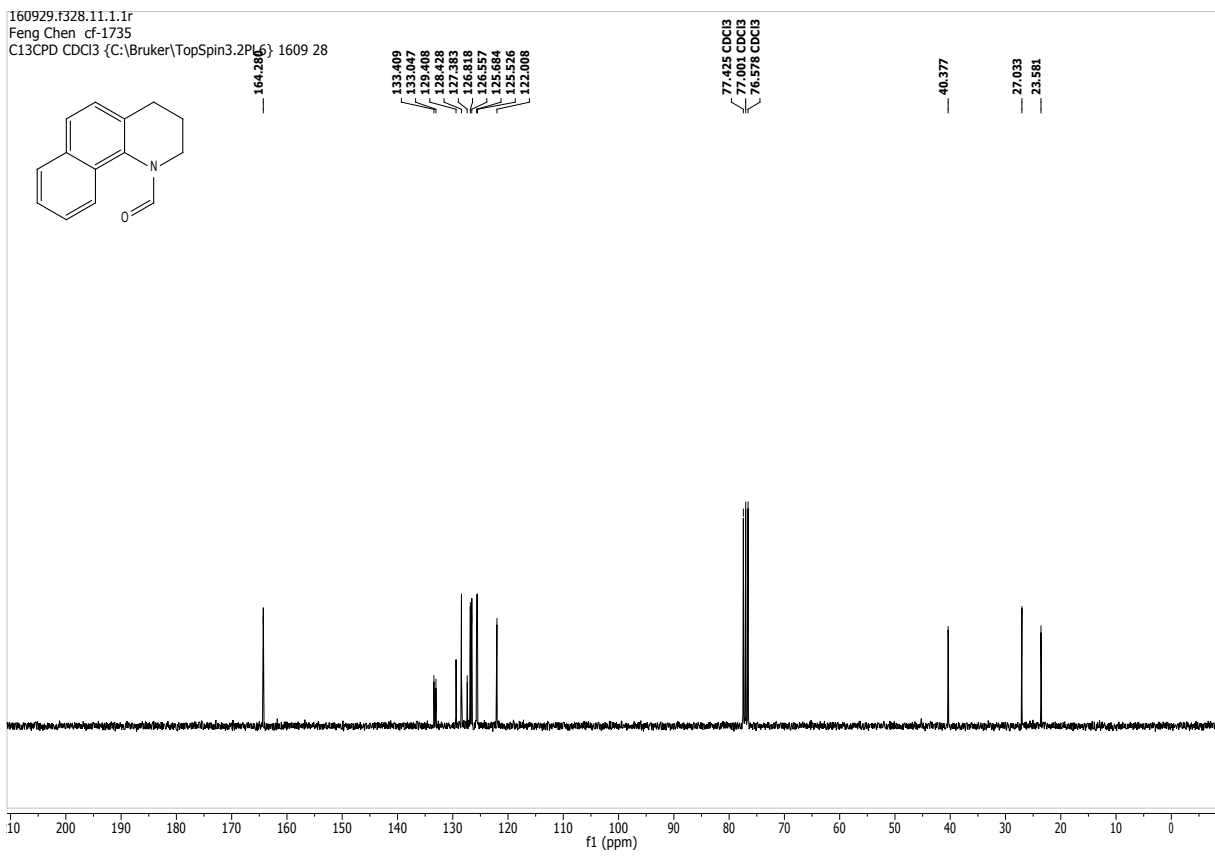

160930.f327.110.nd  
Sahoo BS-340-R  
PROTON CDCl3 {C:\Bruker\TopSpin3.2\PL6} 1609 27

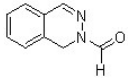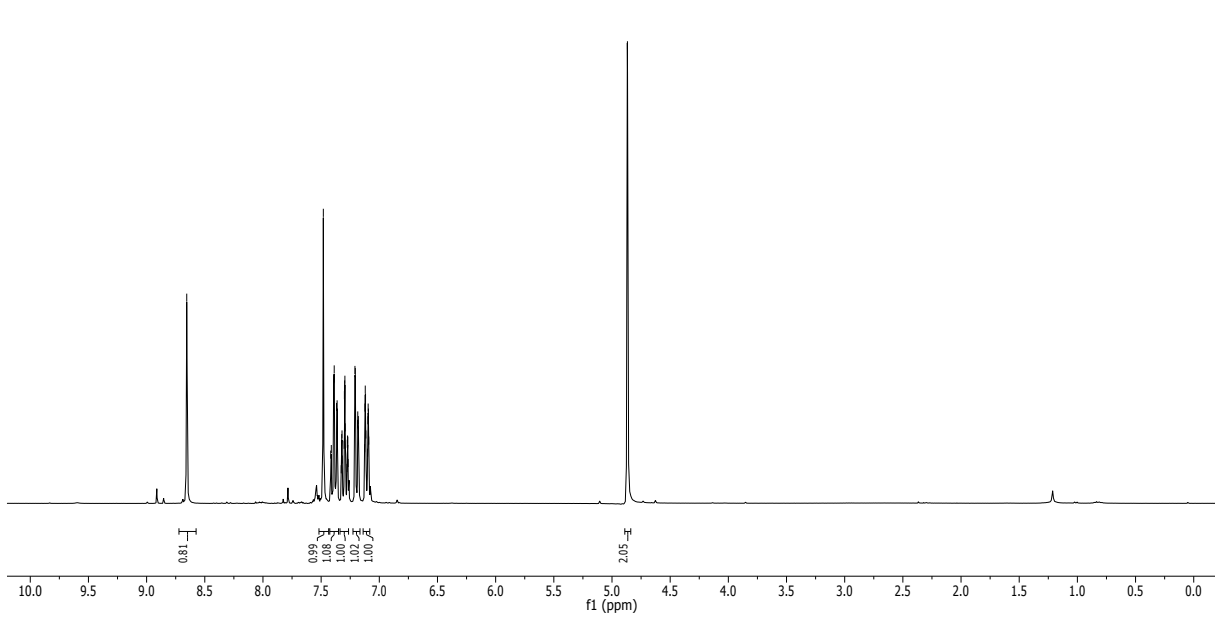

160930.f327.11.fid  
Sahoo BS-340-R  
C13CPD CDCl3 {C:\Bruker\TopSpin3.2\PL6} 1609 27

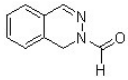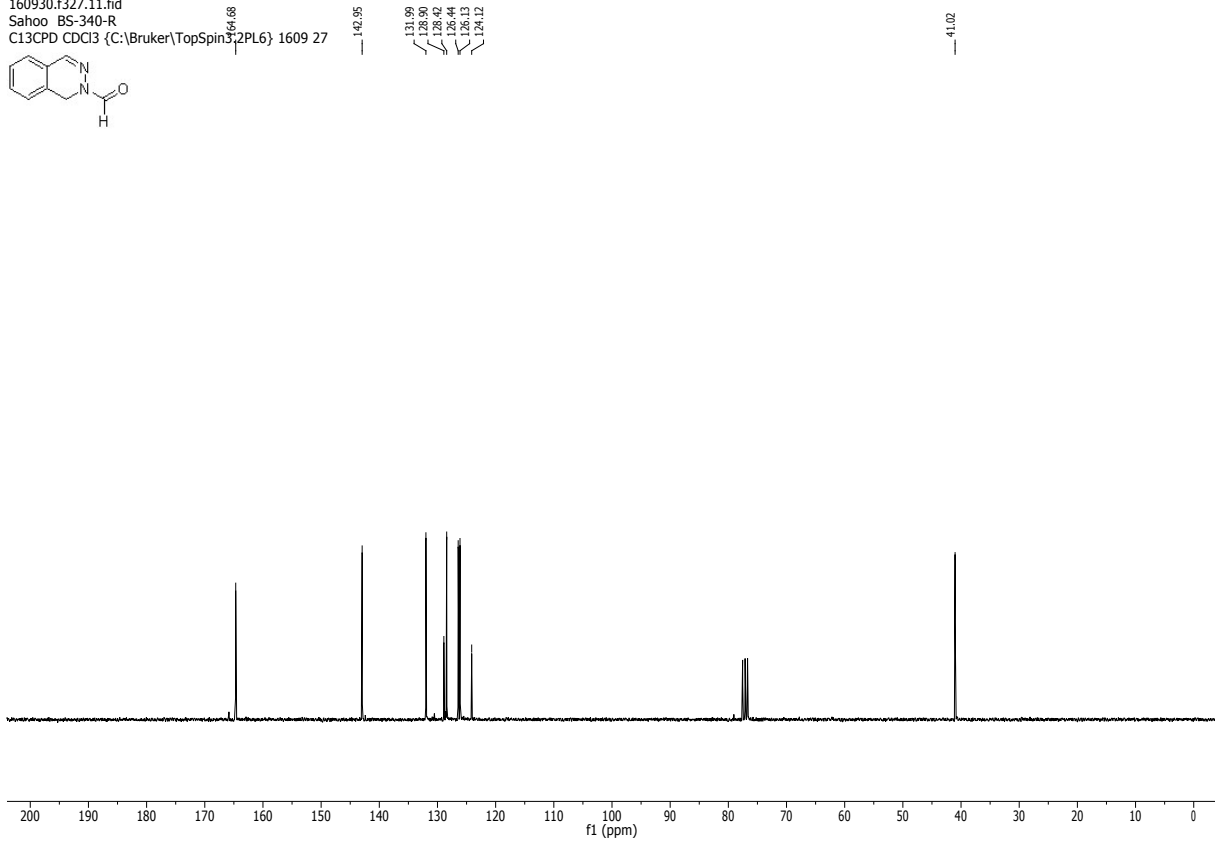



170112.411.10.hd  
F.Chen cf-BS-348R  
Au1H CDCl3 /opt/topspin 1701 11

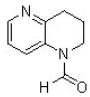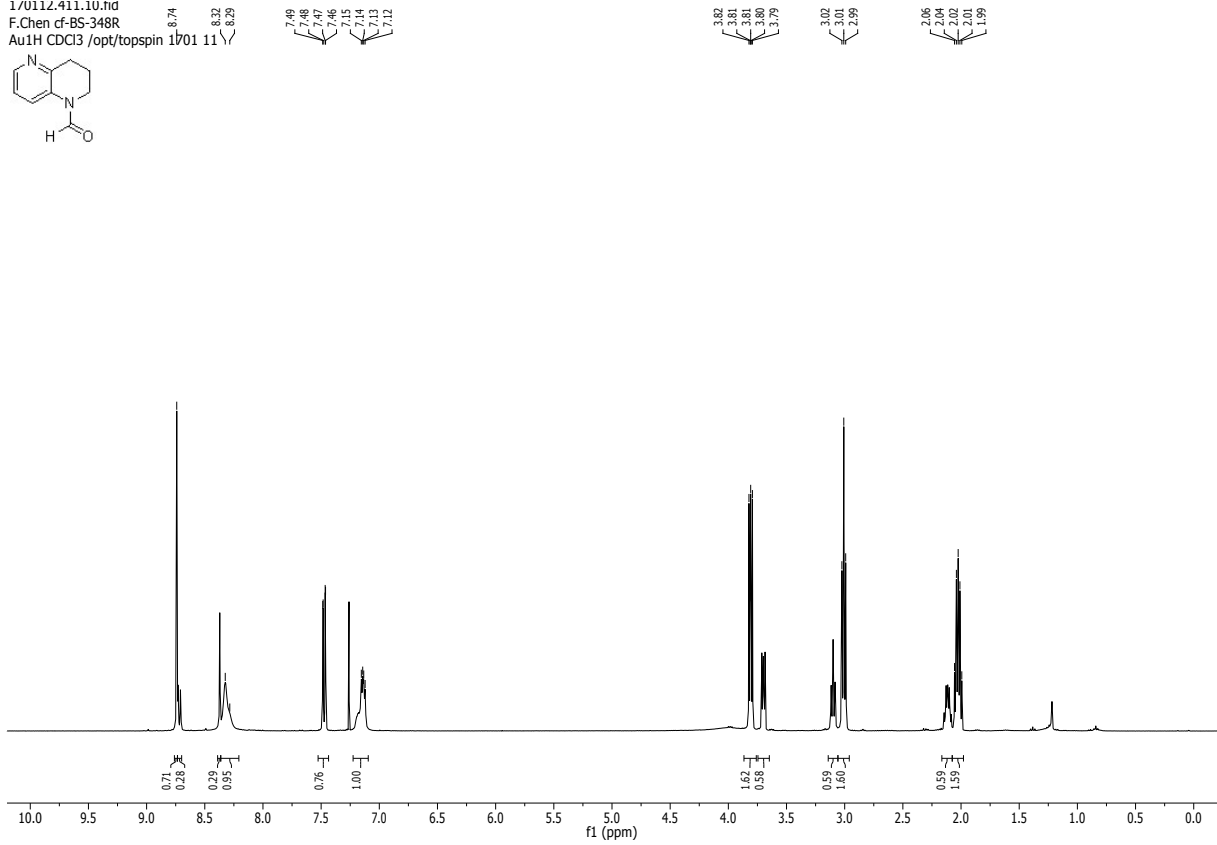

170112.411.11.fid  
F.Chen cf-BS-348R  
Au13C CDCl3 /opt/topspin 1701 11

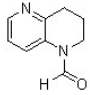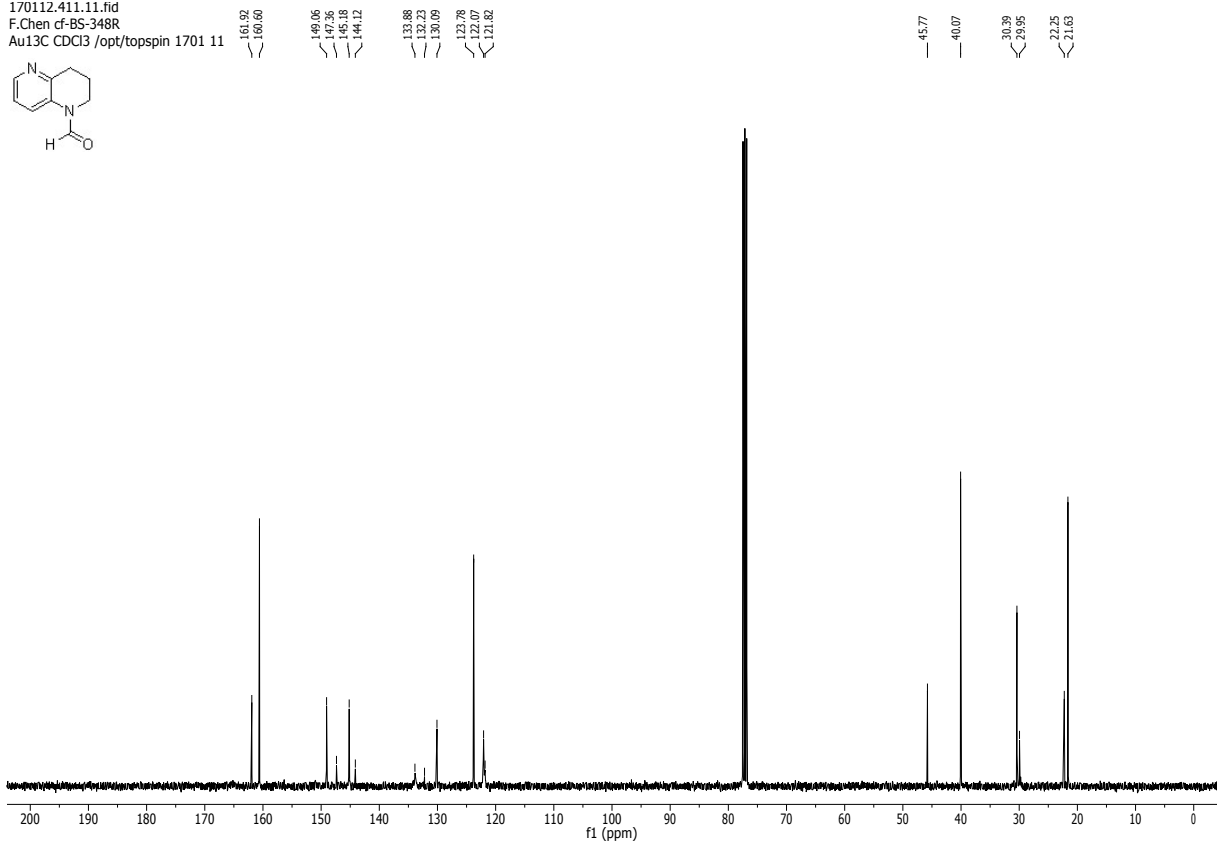

## 11. References:

1. J. Wu, C. Wang, W. Tang, A. Pettman and J. Xiao, *Chem. Eur. J.* **2012**, *18*, 9525-9529.
